# Supplementary material for: Archaeogenetics reconstructs demography and extreme parental consanguinity in a Bronze Age community from Southern Italy
Source: Springer Nature journal article supplement (doi:10.1038/s42003-025-09194-2), 2025-12-15
Supplement: MOESM2 [file 42003_2025_9194_MOESM2_ESM.pdf]

## Description of Additional Supplementary Files

**File name:** Supplementary Data 1

**Description:** Middle Chalcolithic to Late Bronze Age palaeogenetic data from the Italian peninsula (data taken from the Allen Ancient DNA Resource repository v62)

**File name:** Supplementary Data 2

**Description:** Summary statistics from MultiQC after EAGER processing of the raw sequence data. Label "A0101" denotes Twist-enriched libraries; "A0201" is used for 1240K libraries

**File name:** Supplementary Data 3

**Description:** Contamination estimates from AuthentiCT. Label "A0201" denotes 1240K-enriched libraries

**File name:** Supplementary Data 4

**Description:** Contamination estimates after contammix

**File name:** Supplementary Data 5

**Description:** Contamination estimates after hapCon. Label "A0101" denotes Twist-enriched libraries

**File name:** Supplementary Data 6

**Description:** Results from Pairwise Mismatch Rate calculation

**File name:** Supplementary Data 7

**Description:** Haplogrep3 results

**File name:** Supplementary Data 8

**Description:** Y haplogroup identification

**File name:** Supplementary Data 9

**Description:** Kinship estimates from READv2.

**File name:** Supplementary Data 10

**Description:** Kinship estimates from KIN

**File name:** Supplementary Data 11

**Description:** ancIBD results

**File name:** Supplementary Data 12

**Description:** Runs of homozygosity segments as detected by hapROH on the individuals from Grotta della Monaca and a reference set of the most inbred prehistoric individuals found in literature

**File name:** Supplementary Data 13

**Description:** HapROH estimate of effective population size. The main Grotta\_della\_Monaca population is composed of individuals GMO001, GMO005, GMO006, GMO009, GMO010, GMO012, GMO015 and GMO018.

**File name:** Supplementary Data 14

**Description:** Dataset used for PCA

**File name:** Supplementary Data 15

**Description:** Results from genetic affinities tested through f4-statistics. The main GMO cluster is composed of individuals GMO001, GMO006, GMO009, GMO015, GMO018 and GMO022.

**File name:** Supplementary Data 16

**Description:** Results from individual pairwise qpWave analysis

**File name:** Supplementary Data 17

**Description:** Results from group-based f4(Mbuti, OldSteppe; X, Anatolia\_N). The Grotta\_della\_Monaca cluster is composed of individuals GMO001, GMO005, GMO006, GMO009, GMO012, GMO015, GMO018 and GMO022.

**File name:** Supplementary Data 18

**Description:** Dataset used for qpWave and qpAdm admixture modelling

**File name:** Supplementary Data 19

**Description:** qpAdm individual distal modelling. \* denotes individuals which did not fulfill SNPs cutoff, and which are only reported for comparative reasons. Base right population set is OldAfrica, WHGB, Anatolia\_N and Afanasievo. Additional Levantine ancestry was tested by adding CHG/Iran\_N as either left or right populations. For this test, we report the fitting model with the lower standard errors in each component.

**File name:** Supplementary Data 20

**Description:** qpAdm group-based distal modelling. \* denotes individuals which did not fulfill SNPs cutoff, and which are only reported for comparative reasons. Base right population set is OldAfrica, WHGB, Anatolia\_N and Afanasievo. Additional Levantine ancestry was tested by adding CHG/Iran\_N as either left or right populations. For this test, we report the fitting model with the lower standard errors in each component. Additional North African ancestry was tested by adding OldNorthAfrican as source population and Morocco\_Iberomaurusian.AG as a right population, but not found in any of the tested population.

**File name:** Supplementary Data 21

**Description:** qpAdm proximal modelling

**File name:** Supplementary Data 22

**Description:** Screening results of SNPs associated with phenotypic traits and monogenic diseases. For each individual, SNPs coverage are reported as number of ancestral reads / number of derived reads

**File name:** Supplementary Data 23

**Description:** HirisPlex Phenotype prediction
