# Supplementary material for: Archaeogenetics reconstructs demography and extreme parental consanguinity in a Bronze Age community from Southern Italy
Source: Commun Biol. 2025 Dec 15;8:1766. doi: 10.1038/s42003-025-09194-2 (PMC12706022; doi:10.1038/s42003-025-09194-2)
Supplement: Supplementary file 3 — Supplementary Data 1-23 [file 42003_2025_9194_MOESM3_ESM.xlsx]

## Sheet: 1
Supplementary Data 1. Middle Chalcolithic to Late Bronze Age palaeogenetic data from the Italian peninsula (data taken from the Allen Ancient DNA Resource repository v62)
Master_ID	Published	Dating_Method	Simplified_date_in_BCE	Group	Latitude	Longitude	Age
GMO001	No	Archaeological	1700-1380	South_Italy	39.627	15.9749	Bronze Age
GMO004	No	Archaeological	1700-1380	South_Italy	39.627	15.9749	Bronze Age
GMO005	No	Radiocarbon	1616-1442	South_Italy	39.627	15.9749	Bronze Age
GMO006.merged	No	Archaeological	1700-1380	South_Italy	39.627	15.9749	Bronze Age
GMO007	No	Radiocarbon	1692-1512	South_Italy	39.627	15.9749	Bronze Age
GMO009	No	Archaeological	1700-1380	South_Italy	39.627	15.9749	Bronze Age
GMO010	No	Archaeological	1700-1380	South_Italy	39.627	15.9749	Bronze Age
GMO012	No	Archaeological	1700-1380	South_Italy	39.627	15.9749	Bronze Age
GMO015	No	Archaeological	1700-1380	South_Italy	39.627	15.9749	Bronze Age
GMO018	No	Radiocarbon	1670-1430	South_Italy	39.627	15.9749	Bronze Age
GMO019	No	Radiocarbon	1560-1380	South_Italy	39.627	15.9749	Bronze Age
GMO021	No	Archaeological	1700-1380	South_Italy	39.627	15.9749	Bronze Age
GMO022	No	Archaeological	1700-1380	South_Italy	39.627	15.9749	Bronze Age
GMO023	No	Archaeological	1700-1380	South_Italy	39.627	15.9749	Bronze Age
R2	Yes	Radiocarbon	6068-5993	South_Italy	41.958	13.5445	Neolithic
R3	Yes	Radiocarbon	5831-5723	South_Italy	41.958	13.5445	Neolithic
R8_Italy	Yes	Radiocarbon	5830-5718	South_Italy	41.958	13.5445	Neolithic
R10	Yes	Radiocarbon	5721-5634	South_Italy	41.958	13.5445	Neolithic
NEO695	Yes	Radiocarbon	5621-5479	Central_Italy	43.075	13.059	Neolithic
R9	Yes	Radiocarbon	5611-5479	South_Italy	41.958	13.5445	Neolithic
NEO834	Yes	Radiocarbon	5552-5368	Central_Italy	41.87	13.283	Neolithic
UZZ077	Yes	Radiocarbon	5476-5365	Sicily	38.11	12.7866	Neolithic
R18	Yes	Radiocarbon	5461-5221	Central_Italy	43.6978	13.0914	Neolithic
UZZ033	Yes	Archaeological	5380-5210	Sicily	38.11	12.7866	Neolithic
UZZ034	Yes	Radiocarbon	5376-5220	Sicily	38.11	12.7866	Neolithic
UZZ074	Yes	Radiocarbon	5327-5214	Sicily	38.11	12.7866	Neolithic
UZZ075	Yes	Radiocarbon	5327-5214	Sicily	38.11	12.7866	Neolithic
R17	Yes	Radiocarbon	5323-5216	Central_Italy	43.6978	13.0914	Neolithic
R6	Yes	Radiocarbon	5318-5084	South_Italy	41.958	13.5445	Neolithic
UZZ087	Yes	Radiocarbon	5311-5214	Sicily	38.11	12.7866	Neolithic
R16	Yes	Radiocarbon	5309-5126	Central_Italy	43.6978	13.0914	Neolithic
R1014	Yes	Radiocarbon	5214-5044	Central_Italy	41.367	13.2914	Neolithic
SLB	Yes	Radiocarbon	5084-2899	South_Italy	39.8741	16.3407	Neolithic
I4062	Yes	Radiocarbon	4984-4784	Sicily	37.724	12.916	Neolithic
UZZ061	Yes	Radiocarbon	4879-4719	Sicily	38.11	12.7866	Neolithic
LON003_LON004	Yes	Radiocarbon	4442-4252	Sardinia	39.8666	9.23335	Neolithic
NOE002	Yes	Radiocarbon	4325-4053	Sardinia	40.6661	8.59315	Neolithic
SID005	Yes	Radiocarbon	4310-4047	Sardinia	40.624	8.63669	Neolithic
NOE001	Yes	Radiocarbon	4246-4001	Sardinia	40.6661	8.59315	Neolithic
I15947	Yes	Radiocarbon	4200-3050	Sardinia	40.6267	8.32306	Neolithic
I15946	Yes	Radiocarbon	4158-3958	Sardinia	40.6267	8.32306	Neolithic
UZZ099	Yes	Radiocarbon	4050-3951	Sicily	38.11	12.7866	Neolithic
I15945	Yes	Radiocarbon	3967-3798	Sardinia	40.6267	8.32306	Neolithic
SUC008	Yes	Radiocarbon	3947-3779	Sardinia	40.8103	8.44221	Neolithic
I16166	Yes	Radiocarbon	3941-3658	Sardinia	40.4106	8.63972	Neolithic
I16165	Yes	Radiocarbon	3787-3652	Sardinia	40.4106	8.63972	Neolithic
R24	Yes	Radiocarbon	3599-3373	Sardinia	40.8103	8.44221	Chalcolithic
NEO830	Yes	Radiocarbon	3516-3369	Central_Italy	43.383	13.55	Chalcolithic
R27	Yes	Archaeological	3500-900	Sardinia	40.8103	8.44221	Chalcolithic
R29	Yes	Archaeological	3500-900	Sardinia	40.8103	8.44221	Chalcolithic
RISE487	Yes	Radiocarbon	3485-3103	North_Italy	45.26	10.379	Chalcolithic
Iceman	Yes	Radiocarbon	3371-3103	North_Italy	46.7691	10.7999	Chalcolithic
BRC022	Yes	Radiocarbon	3355-3028	North_Italy	45.4676	11.5898	Chalcolithic
I16183	Yes	Radiocarbon	3346-3098	Sardinia	40.6267	8.32306	Chalcolithic
FIL004	Yes	Radiocarbon	3338-3029	Sardinia	40.2781	8.76917	Chalcolithic
BRC001	Yes	Radiocarbon	3331-2921	North_Italy	45.4676	11.5898	Chalcolithic
NEO828	Yes	Archaeological	3300-3000	South_Italy	40.416	15.066	Chalcolithic
RISE489	Yes	Radiocarbon	2909-2576	North_Italy	45.26	10.379	Early Bronze Age
R4	Yes	Radiocarbon	2906-2880	South_Italy	41.958	13.5445	Early Bronze Age
R5_Italy	Yes	Radiocarbon	2905-2786	South_Italy	41.958	13.5445	Early Bronze Age
LSC005	Yes	Radiocarbon	2868-2497	Central_Italy	41.4251	13.2363	Early Bronze Age
SID006	Yes	Radiocarbon	2866-2577	Sardinia	40.624	8.63669	Early Bronze Age
LSC002	Yes	Radiocarbon	2859-2497	Central_Italy	41.4251	13.2363	Early Bronze Age
LSC011	Yes	Radiocarbon	2855-2488	Central_Italy	41.4251	13.2363	Early Bronze Age
NEO823	Yes	Archaeological	2852-2577	South_Italy	40.883	16.733	Early Bronze Age
I16164	Yes	Radiocarbon	2571-2343	Sardinia	40.4106	8.63972	Early Bronze Age
SEC002	Yes	Radiocarbon	2470-2306	Sardinia	40.7862	8.59581	Early Bronze Age
SEC005	Yes	Radiocarbon	2469-2306	Sardinia	40.7862	8.59581	Early Bronze Age
R26	Yes	Radiocarbon	2468-2306	Sardinia	40.8103	8.44221	Early Bronze Age
I14677	Yes	Radiocarbon	2464-2294	Sardinia	40.7897	8.59139	Early Bronze Age
SEC004	Yes	Radiocarbon	2463-2299	Sardinia	40.7862	8.59581	Early Bronze Age
SUC007	Yes	Radiocarbon	2462-2290	Sardinia	40.8103	8.44221	Early Bronze Age
SEC006	Yes	Radiocarbon	2461-2297	Sardinia	40.7862	8.59581	Early Bronze Age
I15942	Yes	Radiocarbon	2459-2209	Sardinia	40.6267	8.32306	Early Bronze Age
I14678	Yes	Radiocarbon	2454-2201	Sardinia	40.7897	8.59139	Early Bronze Age
I8561	Yes	Radiocarbon	2399-2153	Sicily	37.95	14.0833	Early Bronze Age
I15941	Yes	Radiocarbon	2343-2144	Sardinia	40.6267	8.32306	Early Bronze Age
I16169	Yes	Radiocarbon	2334-2140	Sardinia	40.6267	8.32306	Early Bronze Age
ISC001	Yes	Radiocarbon	2297-2139	Sardinia	40.6634	8.53865	Early Bronze Age
R28	Yes	Radiocarbon	2296-2144	Sardinia	40.8103	8.44221	Early Bronze Age
SUA005	Yes	Radiocarbon	2292-2141	Sardinia	39.87	9.2356	Early Bronze Age
PJU002	Yes	Radiocarbon	2292-2051	Sardinia	40.0667	8.60056	Early Bronze Age
SUC005	Yes	Radiocarbon	2288-2136	Sardinia	40.8103	8.44221	Early Bronze Age
I11443	Yes	Radiocarbon	2279-2102	Sicily	37.908	13.478	Early Bronze Age
I11442	Yes	Radiocarbon	2276-2060	Sicily	37.908	13.478	Early Bronze Age
JK2716	Yes	Radiocarbon	2274-2032	Sardinia	39.87	9.2356	Early Bronze Age
R25	Yes	Radiocarbon	2204-2038	Sardinia	40.8103	8.44221	Early Bronze Age
I14676	Yes	Radiocarbon	2200-2030	Sardinia	40.7897	8.59139	Early Bronze Age
I1979	Yes	Archaeological	2200-1930	North_Italy	44.78	10.29	Early Bronze Age
I2477	Yes	Archaeological	2200-1930	North_Italy	44.78	10.29	Early Bronze Age
I7774	Yes	Radiocarbon	2200-1650	Sicily	36.8831	14.5712	Early Bronze Age
UZZ057	Yes	Radiocarbon	2196-2031	Sicily	38.11	12.7866	Early Bronze Age
I2478	Yes	Radiocarbon	2196-1939	North_Italy	44.78	10.29	Early Bronze Age
I7807	Yes	Radiocarbon	2195-2027	Sicily	36.8831	14.5712	Early Bronze Age
I14675	Yes	Radiocarbon	2191-1973	Sardinia	40.7897	8.59139	Early Bronze Age
SUC001	Yes	Radiocarbon	2141-1975	Sardinia	40.8103	8.44221	Early Bronze Age
I3743	Yes	Radiocarbon	2136-1946	Sardinia	39.8666	9.23335	Early Bronze Age
RISE486	Yes	Radiocarbon	2136-1771	North_Italy	45.26	10.379	Early Bronze Age
SUC003	Yes	Radiocarbon	2131-1941	Sardinia	40.8103	8.44221	Early Bronze Age
I7800	Yes	Radiocarbon	2127-1900	Sicily	36.8831	14.5712	Early Bronze Age
SUA007	Yes	Radiocarbon	2026-1888	Sardinia	39.87	9.2356	Early Bronze Age
I7805	Yes	Radiocarbon	2017-1778	Sicily	36.8831	14.5712	Early Bronze Age
R22	Yes	Radiocarbon	2015-1826	Sardinia	40.8103	8.44221	Early Bronze Age
BRC010	Yes	Radiocarbon	1954-1746	North_Italy	45.4676	11.5898	Bronze Age
BRC030	Yes	Radiocarbon	1937-1695	North_Italy	45.4676	11.5898	Bronze Age
R11102	Yes	Radiocarbon	1925-1772	Central_Italy	42.0263	11.9483	Bronze Age
R11104	Yes	Radiocarbon	1923-1614	Central_Italy	42.0263	11.9483	Bronze Age
R11107	Yes	Radiocarbon	1923-1614	Central_Italy	42.0263	11.9483	Bronze Age
JK2723	Yes	Radiocarbon	1921-1746	Sardinia	39.87	9.2356	Bronze Age
JK2739	Yes	Radiocarbon	1882-1690	Sardinia	39.87	9.2356	Bronze Age
I7796	Yes	Radiocarbon	1880-1689	Sicily	36.8831	14.5712	Bronze Age
S1249	Yes	Archaeological	1800-1600	Sardinia	39.87	9.2356	Bronze Age
S1250	Yes	Archaeological	1800-1600	Sardinia	39.87	9.2356	Bronze Age
S1252	Yes	Archaeological	1800-1600	Sardinia	39.87	9.2356	Bronze Age
S1253	Yes	Archaeological	1800-1600	Sardinia	39.87	9.2356	Bronze Age
R11105	Yes	Radiocarbon	1736-1616	Central_Italy	42.0263	11.9483	Bronze Age
GCP003	Yes	Radiocarbon	1617-1462	Central_Italy	41.7585	13.3652	Bronze Age
BRC007	Yes	Radiocarbon	1615-1458	North_Italy	45.4676	11.5898	Bronze Age
BRC003	Yes	Radiocarbon	1608-1431	North_Italy	45.4676	11.5898	Bronze Age
I16161	Yes	Radiocarbon	1534-1438	Sardinia	40.6267	8.32306	Bronze Age
I16170	Yes	Radiocarbon	1491-1301	Sardinia	40.6267	8.32306	Bronze Age
JK2714	Yes	Radiocarbon	1411-1228	Sardinia	39.87	9.2356	Bronze Age
I10371	Yes	Radiocarbon	1400-900	Sicily	37.68	12.789	Bronze Age
I10373	Yes	Radiocarbon	1400-1100	Sicily	37.68	12.789	Bronze Age
I10552	Yes	Radiocarbon	1386-1212	Sardinia	39.6833	9.43333	Bronze Age
ORC004	Yes	Radiocarbon	1386-1135	Sardinia	39.6672	9.42611	Bronze Age
NEO806	Yes	Radiocarbon	1386-1129	South_Italy	40.957	17.29	Bronze Age
I3878	Yes	Radiocarbon	1382-1134	Sicily	37.68	12.789	Bronze Age
I10372	Yes	Radiocarbon	1377-1130	Sicily	37.68	12.789	Bronze Age
ORC003	Yes	Radiocarbon	1374-1126	Sardinia	39.6672	9.42611	Bronze Age
ORC007	Yes	Radiocarbon	1371-1125	Sardinia	39.6672	9.42611	Bronze Age
ORC001	Yes	Radiocarbon	1368-1123	Sardinia	39.6672	9.42611	Bronze Age
SUA006	Yes	Radiocarbon	1265-1112	Sardinia	39.87	9.2356	Bronze Age
ORC006	Yes	Radiocarbon	1263-1057	Sardinia	39.6672	9.42611	Bronze Age
ORC005	Yes	Radiocarbon	1261-1124	Sardinia	39.6672	9.42611	Bronze Age
I10554	Yes	Radiocarbon	1261-1059	Sardinia	39.6833	9.43333	Bronze Age
JK2720	Yes	Radiocarbon	1260-1054	Sardinia	39.87	9.2356	Bronze Age
I10553	Yes	Radiocarbon	1255-1055	Sardinia	39.6833	9.43333	Bronze Age
I3741	Yes	Radiocarbon	1221-1021	Sardinia	39.6833	9.43333	Bronze Age
ORC009	Yes	Radiocarbon	1211-1016	Sardinia	39.6672	9.42611	Bronze Age
ORC008	Yes	Radiocarbon	1198-991	Sardinia	39.6672	9.42611	Bronze Age
I10364	Yes	Radiocarbon	1150-800	Sardinia	40.5467	8.32156	Bronze Age
I3642	Yes	Radiocarbon	1121-936	Sardinia	40.5467	8.32156	Bronze Age
I3876	Yes	Radiocarbon	1107-901	Sicily	37.68	12.789	Bronze Age

## Sheet: 2
Supplementary Data 2. Summary statistics from MultiQC after EAGER processing of the raw sequence data. Label "A0101" denotes Twist-enriched libraries; "A0201" is used for 1240K libraries
Library	Samtools Flagstat (pre-samtools filter)_mqc-generalstats-samtools_flagstat_pre_samtools_filter-flagstat_total	Samtools Flagstat (pre-samtools filter)_mqc-generalstats-samtools_flagstat_pre_samtools_filter-mapped_passed	Samtools Flagstat (pre-samtools filter)_mqc-generalstats-samtools_flagstat_pre_samtools_filter-mapped_passed_pct	Samtools Flagstat (post-samtools filter)_mqc-generalstats-samtools_flagstat_post_samtools_filter-flagstat_total	Samtools Flagstat (post-samtools filter)_mqc-generalstats-samtools_flagstat_post_samtools_filter-mapped_passed_pct	QualiMap_mqc-generalstats-qualimap-avg_gc	QualiMap_mqc-generalstats-qualimap-general_error_rate	QualiMap_mqc-generalstats-qualimap-mean_coverage	Picard_mqc-generalstats-picard-PERCENT_DUPLICATION	DamageProfiler_mqc-generalstats-damageprofiler-mean_readlength	DamageProfiler_mqc-generalstats-damageprofiler-median	DamageProfiler_mqc-generalstats-damageprofiler-5_Prime1	DamageProfiler_mqc-generalstats-damageprofiler-5_Prime2	DamageProfiler_mqc-generalstats-damageprofiler-3_Prime1	DamageProfiler_mqc-generalstats-damageprofiler-3_Prime2	base snp_coverage_mqc-generalstats-base_snp_coverage-Total_Snps	base snp_coverage_mqc-generalstats-base_snp_coverage-Covered_Snps	base endorSpy_mqc-generalstats-base_endorspy-endogenous_dna	base endorSpy_mqc-generalstats-base_endorspy-endogenous_dna_post	base nuclear_contamination_mqc-generalstats-base_nuclear_contamination-Num_SNPs	base nuclear_contamination_mqc-generalstats-base_nuclear_contamination-Method1_ML_estimate	base nuclear_contamination_mqc-generalstats-base_nuclear_contamination-Method1_ML_SE	base nuclear_contamination_mqc-generalstats-base_nuclear_contamination-Method1_MOM_estimate	base nuclear_contamination_mqc-generalstats-base_nuclear_contamination-Method1_MOM_SE	base nuclear_contamination_mqc-generalstats-base_nuclear_contamination-Method2_ML_estimate	base nuclear_contamination_mqc-generalstats-base_nuclear_contamination-Method2_ML_SE	base nuclear_contamination_mqc-generalstats-base_nuclear_contamination-Method2_MOM_SE	base nuclear_contamination_mqc-generalstats-base_nuclear_contamination-Method2_MOM_estimate	SexDetErrmine_mqc-generalstats-sexdeterrmine-RateX	SexDetErrmine_mqc-generalstats-sexdeterrmine-RateY	SexDetErrmine_mqc-generalstats-sexdeterrmine-RateErrX	SexDetErrmine_mqc-generalstats-sexdeterrmine-RateErrY	mtnucratio_mqc-generalstats-mtnucratio-nucreads	mtnucratio_mqc-generalstats-mtnucratio-mtreads	mtnucratio_mqc-generalstats-mtnucratio-mt_cov_avg	Technology	Sequenced_libraries
GMO001 (merged_libraries)	78543881	58714424	74.7537	20781605	100	43.1239	0.93	0.3617	0.79	53.59	51	0.28	0.01	0	0	1233013	1168765	74.7537	26.4586	23037	0.354399	1.22e-11	0.350266	0.00217712	0.327665	2.54e-11	0.00323901	0.310111	1.00417	0.00452808	0.00145007	0.00011759	20781605	712	1.26264	Twist and 1240K	3SE+1PE
GMO001.A0101	63096167	55082144	87.3	49246844	100	42.48	0.85	0.3304	0.616081	54.8332	51	0.273558	0.0158745	0.00472104	0.00483823	1233013	945388	87.2987	78.0505	21484	0.363281	1.22e-11	0.351864	0.00316965	0.337447	1.28e-11	0.00623901	0.340781	1.01087	0.00446153	0.00149677	0.000120065	18906784	292	1.12373	Twist	1PE
GMO001.A0201	15447714	3632280	23.51	2297581	100	44.72	1.8	0.0313	0.184002	52.354	51	0.372318	0.213649	0.0155504	0.00709428	1233013	311331	23.5134	14.8733	1885	0.262231	3.2e-13	0.255491	0.0113685	0.272768	4.67e-13	0.0197719	0.271732	0.888754	0.00567381	0.00580881	0.000561836	1874821	443	1.3215	1240K	3SE
GMO002.A0201	13180657	52660	0.4	12345	100	44.9026	4.24	0.0001	0.227785	41.1824	36	0.257851	0.14647	0.0224009	0.0161713	1233013	960	0.399525	0.09366	1	0	0	0	0	0	0	0	0	0.552571	0.597325	0.0907024	0.115926	9533	3	0.00863057	1240K	3SE
GMO003.A0201	17390822	72799	0.42	27348	100	47.3008	1.79	0.0004	0.23786	54.7095	56	0.0604747	0.0313989	0.0169375	0.00783828	1233013	3708	0.418606	0.157255	1	0	0	0	0	0	0	0	0	0.66729	0.306366	0.0520645	0.043086	20843	7	0.0261331	1240K	3SE
GMO004.A0201	30948404	1306918	4.22	789631	100	39.3524	2.34	0.007	0.329496	41.546	39	0.501255	0.284977	0.00787371	0.00427869	1233013	88704	4.22289	2.55144	70	0.013484	7.2e-17	0.006771	0.0250227	-0.011852	4.32e-17	0.0120473	-0.025126	0.472649	0.556705	0.00842049	0.0112465	529451	223	0.550425	1240K	6SE
GMO005.A0201	45011824	15049240	33.43	10107249	100	45.4002	1.74	0.136	0.242715	55.7635	55	0.370256	0.217754	0.0174408	0.00818511	1233013	746979	33.434	22.4547	9707	0.311449	3e-12	0.293096	0.00501104	0.293419	5.87e-12	0.00922002	0.29539	0.877672	0.00555319	0.00284777	0.000274274	7654072	2437	7.75997	1240K	6SE
GMO006 (merged_libraries)	43713015	11434547	26.1582	6269836	100	44.6871	1.92	0.1081	0.16	53.08	52	0.38	0.01	0.03	0	1233013	690847	26.1582	14.3432	3021	0.014454	6.7e-12	0.019133	0.00500406	0.013	6.63e-12	0.00909765	0.007544	0.450647	0.553548	0.00218685	0.002984	6269836	3551	8.14315	1240K	3SE
GMO006.A0201	16532567	7954417	48.11	5294711	100	44.17	1.9	0.0756	0.16699	53.7886	52	0.377813	0.220844	0.0145627	0.00726687	1233013	580548	48.1136	32.0259	2499	0.023654	3.71e-14	0.022018	0.00500406	0.01319	7.98e-15	0.00689163	0.008868	0.448236	0.550144	0.00262352	0.00357842	4410548	2475	7.65617	1240K	3SE
GMO007.A0201	16974409	9703532	57.17	6806264	100	44.9003	1.73	0.1041	0.150917	56.5154	56	0.342427	0.200469	0.0152393	0.00721229	1233013	621831	57.1657	40.0972	3035	0.014542	4.73e-14	0.01676	0.00416813	0.018821	8.6e-15	0.00697442	0.021396	0.438933	0.547269	0.00239517	0.00329328	5779080	2848	9.40202	1240K	3SE
GMO008.A0201	14414717	94117	0.65	44688	100	43.5894	2.24	0.0006	0.197055	48.5269	45	0.304968	0.191855	0.0131477	0.00879729	1233013	6378	0.652923	0.310016	0	1.30879	0	0	0	1.30879	8.6e-15	8.6e-15	8.6e-15	0.983311	0.0310948	0.0482481	0.0103695	35882	22	0.0639145	1240K	3SE
GMO009 (merged_libraries)	83696947	35195161	42.0507	11570279	100	41.9403	1.01	0.1975	0.5	52.55	49	0.3	0.01	0.01	0	1233013	1085009	42.0507	13.824	13114	0.0979995	8.93e-12	0.088234	0.00880974	0.046	8.4e-13	0.00478989	0.129087	0.535627	0.502914	0.00144626	0.00172105	11570279	2698	6.85068	Twist and 1240K	6SE+1PE
GMO009.A0101	46398832	31825231	68.59	26984416	100	41.26	0.87	0.1729	0.627268	53.9247	49	0.290556	0.0163247	0.00445677	0	1233013	970625	68.5906	58.1575	12985	0.122856	3.64e-13	0.122847	0.00291852	0.130497	3.23e-12	0.00547296	0.131574	0.54338	0.498397	0.0015258	0.00179419	10057957	915	3.23453	Twist	1PE
GMO009.A0201	37298115	3369930	9.04	2051866	100	43.13	1.95	0.0247	0.262953	51.1776	49	0.388685	0.222071	0.012216	0	1233013	136748	9.03512	5.50126	469	0.073143	3.3e-15	0.070843	0.0162038	0.055033	1.31e-14	0.0232854	0.060754	0.455524	0.549582	0.00448215	0.00606038	1512322	2160	6.66618	1240K	6SE
GMO010 (merged_libraries)	101514561	59893753	59.0002	13644613	100	43.1007	0.78	0.2661	0.45	59.43	56	0.17	0.01	0.01	0	1233013	1130330	59.0002	13.441	21754	0.292466	3e-12	0.262147	0.0043911	0.298	4.12e-12	0.00587603	0.344598	1.02624	0.00680028	0.00186517	0.000183274	13644613	4212	13.7809	Twist and 1240K	6SE+1PE
GMO010.A0101	64018701	55683649	86.98	51105941	100	42.24	0.71	0.2291	0.772841	61.9231	56	0.16835	0.0100279	0.00535604	0.00459857	1233013	1094548	86.9803	79.8297	20622	0.332999	1.68e-11	0.317006	0.00317705	0.323091	6.74e-12	0.0061746	0.323241	1.03751	0.00658133	0.00197187	0.000189531	11609158	706	3.31136	Twist	1PE
GMO010.A0201	37495860	4210104	11.23	2931606	100	45.18	1.23	0.037	0.305686	56.9531	56	0.226633	0.11877	0.0170665	0.00765391	1233013	178782	11.2282	7.81848	2243	0.251933	6.28e-13	0.244154	0.0103805	0.270459	1.97e-13	0.0177905	0.26885	0.918966	0.00888498	0.00571231	0.000679537	2035455	3548	12.0299	1240K	6SE
GMO011.A0201	40060715	470681	1.17	288421	100	43.4785	1.77	0.0029	0.347242	49.0726	45	0.297457	0.156897	0.0112323	0.0067375	1233013	31522	1.17492	0.71996	28	0.221097	1.44e-16	0.213795	0.098295	0.221783	2.88e-16	0.153487	0.213795	0.860986	0.100608	0.0197758	0.00819903	188269	2362	6.46008	1240K	6SE
GMO012 (merged_libraries)	69569354	53926306	77.5145	21960059	100	43.7471	1.07	0.3385	0.97	46.89	43	0.31	0.01	0.01	0	1233013	1165481	77.5145	31.5657	22078	0.318767	1.33e-11	0.325519	0.00433929	0.299	3.44e-12	0.00701943	0.348777	0.936734	0.00366208	0.00140114	0.000105942	21960059	5527	18.1734	Twist and 1240K	3SE+1PE
GMO012.A0101	55347683	48818007	88.2	41890559	100	43.27	0.95	0.304	0.533307	48.7806	45	0.303466	0.0200618	0.00513594	0.0049564	1233013	1122532	88.2024	75.6862	20931	0.368578	2.56e-11	0.351137	0.00324533	0.347022	8.03e-12	0.00639432	0.350424	0.943196	0.00355923	0.00145417	0.00010801	19550046	1534	6.28493	Twist	1PE
GMO012.A0201	14221671	5108299	35.92	2867859	100	43.49	2.11	0.0346	0.159647	45.0131	42	0.428405	0.243745	0.00789151	0.00454538	1233013	353050	35.9191	20.1654	2091	0.268955	7.87e-14	0.258518	0.0109934	0.292527	3.12e-13	0.0196943	0.293289	0.843709	0.00514276	0.00520755	0.000492623	2410013	4659	15.8396	1240K	3SE
GMO013.A0201	13229536	87721	0.66	45054	100	44.8344	2.19	0.0005	0.212634	43.7564	41	0.293963	0.148438	0.00855107	0.00601651	1233013	6589	0.663069	0.340556	2	0.335793	0	0.335925	0.338448	0.735295	0	0.736377	0.719839	0.879834	0.0290995	0.0440555	0.00970383	35474	238	0.675056	1240K	3SE
GMO014.A0201	13503637	62525	0.46	8844	100	43.2368	7.09	0.0001	0.220715	37.2239	31	0.0397898	0.0288612	0.0304976	0.021865	1233013	307	0.463023	0.0654935	1	0	0	0	8.6e-15	8.6e-15	8.6e-15	8.6e-15	0	0.863042	1.15855	0.213184	0.304018	6892	0	0.0066003	1240K	3SE
GMO015.A0201	11249116	6184150	54.97	4599499	100	46.7391	1.21	0.06	0.327541	60.8884	64	0.236457	0.128685	0.0137454	0.00725586	1233013	423265	54.9745	40.8876	1138	0.027405	3.04e-15	0.023425	0.00656303	0.019014	1.2e-14	0.00925948	0.015407	0.44577	0.507476	0.0033419	0.00438765	3092976	8936	34.3895	1240K	3SE
GMO016.A0201	10006404	19184	0.19	7822	100	44.5474	6.12	0.0001	0.232038	39.4475	31	0.0817264	0.0465357	0.0224048	0.0206585	1233013	384	0.191717	0.0781699	0	1.30879	0	0	0	1.30879	0	0	0	0.518556	1.01434	0.140134	0.2425	6007	9	0.0277023	1240K	3SE
GMO017.A0201	13798963	185374	1.34	31282	100	47.7566	2.03	0.0004	0.256186	55.4622	56	0.0231848	0.01325	0.0181175	0.0135159	1233013	3883	1.34339	0.226698	0	1.30879	0	0	0	1.30879	0	0	0	0.701955	0.369031	0.051556	0.0456619	23268	13	0.0430925	1240K	3SE
GMO018.A0201	37031671	16547320	44.68	11325042	100	45.0231	1.59	0.145	0.274371	55.3554	54	0.337587	0.191786	0.0198225	0.00862018	1233013	760173	44.6842	30.582	9963	0.297356	2.03e-12	0.284057	0.00489255	0.286647	3.92e-12	0.00896774	0.287235	0.88324	0.0073731	0.00286599	0.000317027	8217776	2330	7.50081	1240K	6SE
GMO019.A0201	16598059	123816	0.75	56533	100	41.7419	2.27	0.0007	0.192967	46.0447	42	0.372509	0.223404	0.013678	0.00654379	1233013	7709	0.745967	0.3406	3	0.277014	0	0.318923	0.608587	-0.047795	0	0.374038	-0.04556	0.9684	0.068394	0.0434719	0.0139744	45624	31	0.0823224	1240K	3SE
GMO020.A0201	17364868	77395	0.45	17154	100	44.8775	3.25	0.0002	0.200245	45.0785	40	0.173611	0.0848682	0.0164136	0.0117609	1233013	1886	0.445699	0.0987857	0	1.30879	0	0	0	1.30879	0	0	0	0.881598	0.119755	0.0848746	0.0379343	13719	6	0.016899	1240K	3SE
GMO021.A0201	14908247	3348077	22.46	2219006	100	44.48	1.96	0.0314	0.194155	55.0678	54	0.388129	0.226699	0.0164473	0.0077337	1233013	330984	22.4579	14.8844	733	0.007787	3.05e-15	0.00096	0.00771513	0.012486	4.18e-15	0.0128872	0.011204	0.455518	0.562317	0.00401211	0.00548833	1788175	676	2.04146	1240K	3SE
GMO022.A0201	12881986	2456745	19.07	1421129	100	45.6188	2.3	0.0166	0.240477	48.1152	46	0.421757	0.244357	0.00996936	0.00457015	1233013	204535	19.0712	11.0319	268	0.040085	4.54e-16	0.030084	0.0196837	0.029463	3e-15	0.0253946	0.013269	0.423787	0.499255	0.00498006	0.00665367	1079380	461	1.26827	1240K	3SE
GMO023.A0201	12272201	132053	1.08	85722	100	42.66	2.51	0.0011	0.170423	50.3828	48	0.392182	0.227485	0.0112881	0.00837029	1233013	12448	1.07603	0.698506	0	1.30879	0	0	0	1.30879	0	0	0	0.474198	0.520838	0.0241947	0.0311887	71113	356	1.14998	1240K	3SE

## Sheet: 3
Supplementary Data 3. Contamination estimates from AuthentiCT. Label "A0201" denotes 1240K-enriched libraries
Library	Contam	std_err
GMO001.A0201	0.001	0.005181
GMO002.A0201	0.368802	0.020157
GMO003.A0201	0.728739	0.019427
GMO004.A0201	0.001	0.004508
GMO005.A0201	0.020476	0.005379
GMO006.A0201	0.001	0.005084
GMO007.A0201	0.081994	0.004958
GMO008.A0201	0.36023	0.006818
GMO009.A0201	0.001	0.005112
GMO009.A0201_pmd	0.001	0.003146
GMO010.A0201	0.040564	0.00983
GMO011.A0201	0.223536	0.006572
GMO012.A0201	0.001	0.004893
GMO013.A0201	0.001	0.015202
GMO014.A0201	0.601161	n/a
GMO015.A0201	0.202974	0.006588
GMO016.A0201	0.425107	0.124578
GMO017.A0201	0.555696	n/a
GMO018.A0201	0.001	0.00621
GMO019.A0201	0.249332	0.005791
GMO020.A0201	0.611398	0.016143
GMO021.A0201	0.010606	0.004663
GMO022.A0201	0.001	0.00396
GMO023.A0201	0.001	0.005566

## Sheet: 4
Supplementary Data 4. Contamination estimates after contammix
Sample	reads	MAP_authentic	lower_bound	upper_bound
GMO001 (merged_libraries)	319	0.988559	0.689665	0.998231
GMO004.A0201	13	0.935431	0.0539286	0.985464
GMO005.A0201	1904	0.997484	0.955002	0.999541
GMO006 (merged libraries)	2916	0.996747	0.952453	0.999448
GMO007.A0201	2320	0.958477	0.905918	0.984671
GMO009 (merged libraries)	2494	0.985571	0.943077	0.998354
GMO010 (merged libraries)	3585	0.977097	0.938784	0.995261
GMO011.A0201	1802	0.988506	0.944763	0.999112
GMO012 (merged libraries)	5345	0.998227	0.971781	0.999685
GMO013.A0201	11	0.909969	0.0314752	0.979056
GMO015.A0201	7700	0.991438	0.962008	0.998945
GMO018.A0201	1783	0.963042	0.904986	0.989751
GMO022.A0201	63	0.973293	0.463338	0.994873

## Sheet: 5
Supplementary Data 5. Contamination estimates after hapCon. Label "A0101" denotes Twist-enriched libraries
Library	Number of target sites covered by at least one read	MLE for contamination using BFGS	Notes
GMO001.A0101	46369	0,408164 (0,404582 - 0,411747)	Female
GMO001.A0201	15536	0,352696 (0,334919 - 0,370474)	Female
GMO003.A0201	156	0,5 (-0,126042 - 1,126042)	Low coverage
GMO004.A0201	2740	0,044028 (0,017247 - 0,070809)	Not contaminated
GMO005.A0201	32790	0,406106 (0,397647 - 0,414565)	Female
GMO006.A0201	17857	0,020412 (0,015528 - 0,025295)	Not contaminated
GMO007.A0201	19574	0,012063 (0,008247 - 0,015878)	Not contaminated
GMO008.A0201	388	0,5 (0,081999 - 0,918001)	Female
GMO009.A0101	40036	0,128273 (0,123839 - 0,132707)	Possibly contaminated
GMO009.A0201	8180	0,084176 (0,068657 - 0,099694)	Possibly contaminated
GMO010.A0101	46066	0,406505 (0,401708 - 0,411301)	Female
GMO010.A0201	17139	0,356104 (0,339546 - 0,372662)	Female
GMO011.A0201	1752	0,437007 (0,315228 - 0,558787)	Female
GMO012.A0101	46130	0,40979 (0,406015 - 0,413565)	Female
GMO012.A0201	16390	0,35112 (0,334381 - 0,367859)	Female
GMO013.A0201	381	0,5 (nan - nan)	Female
GMO014.A0201	15	0,046618 (-1,920748 - 2,013984)	Female
GMO015.A0201	13024	0,010336 (0,005377 - 0,015294)	Not contaminated
GMO016.A0201	11	0,213494 (-3,024527 - 3,451515)	Low coverage
GMO017.A0201	180	0,0 (-1,194601 - 1,194601)	Low coverage
GMO018.A0201	33903	0,391252 (0,382856 - 0,399648)	Female
GMO019.A0201	476	0,5 (0,205406 - 0,794594)	Female
GMO020.A0201	107	0,431069 (-0,143068 - 1,005206)	Female
GMO021.A0201	9833	0,020836 (0,012548 - 0,029124)	Not contaminated
GMO022.A0201	5887	0,020076 (0,007058 - 0,033094)	Not contaminated
GMO023.A0201	361	0,000759 (-0,304751 - 0,306269)	Not contaminated

## Sheet: 6
Supplementary Data 6. Results from Pairwise Mismatch Rate calculation
Individual 1	Individual 2	nSNPs	nmismatch	pmismatch	SE	Z-value	Relative reduction	Rval	Average	Estimate
GMO002	GMO014	0	0	0	#DIV/0!	#DIV/0!	-1	2	0.240392
GMO002	GMO016	3	0	0	0	#DIV/0!	-1	2	0.240392
GMO008	GMO014	3	0	0	0	#DIV/0!	-1	2	0.240392
GMO013	GMO014	4	0	0	0	#DIV/0!	-1	2	0.240392
GMO014	GMO016	4	0	0	0	#DIV/0!	-1	2	0.240392
GMO016	GMO017	9	0	0	0	#DIV/0!	-1	2	0.240392
GMO019	GMO014	7	0	0	0	#DIV/0!	-1	2	0.240392
GMO020	GMO016	3	0	0	0	#DIV/0!	-1	2	0.240392
GMO023	GMO014	2	0	0	0	#DIV/0!	-1	2	0.240392
GMO006	GMO021	186638	23242	0.12453	0.00152858	75.7894	-0.481972	0.963943	0.240392	Same ind
GMO022	GMO007	135950	20929	0.15395	0.00195762	44.1506	-0.359588	0.719177	0.240392	First degree
GMO023	GMO006	7285	952	0.13068	0.00789786	13.8898	-0.456389	0.912777	0.240392	Same ind
GMO023	GMO021	4561	636	0.13944	0.0102585	9.83964	-0.419948	0.839896	0.240392	Same ind
GMO018	GMO019	5752	952	0.16551	0.00980039	7.63949	-0.3115	0.623001	0.240392	First degree
GMO002	GMO006	602	115	0.19103	0.0320441	1.54006	-0.205341	0.410681	0.240392
GMO004	GMO016	53	6	0.11321	0.0870452	1.46097	-0.529061	1.05812	0.240392
GMO021	GMO005	232567	55306	0.23781	0.00176564	1.45556	-0.010742	0.021484	0.240392
GMO019	GMO023	116	17	0.14655	0.0656724	1.42876	-0.390371	0.780743	0.240392
GMO023	GMO013	110	16	0.14545	0.0672294	1.41203	-0.394947	0.789895	0.240392
GMO011	GMO016	14	1	0.07143	0.137662	1.22728	-0.702861	1.40572	0.240392
GMO008	GMO017	29	3	0.10345	0.113105	1.21064	-0.569662	1.13932	0.240392
GMO002	GMO021	379	73	0.19261	0.0405127	1.17914	-0.198768	0.397536	0.240392
GMO013	GMO017	28	3	0.10714	0.116901	1.13977	-0.554312	1.10862	0.240392
GMO019	GMO008	74	11	0.14865	0.0827086	1.10907	-0.381636	0.763271	0.240392
GMO006	GMO005	400067	95602	0.23896	0.00134844	1.05307	-0.00595814	0.0119163	0.240392
GMO019	GMO011	304	60	0.19737	0.0456553	0.942059	-0.178967	0.357934	0.240392
GMO019	GMO006	4666	1072	0.22975	0.0123169	0.863042	-0.0442705	0.088541	0.240392
GMO015	GMO016	166	32	0.19277	0.0612342	0.777506	-0.198102	0.396205	0.240392
GMO016	GMO010	349	73	0.20917	0.043542	0.716779	-0.129881	0.259761	0.240392
GMO013	GMO021	2511	576	0.22939	0.0167807	0.654917	-0.0457681	0.0915361	0.240392
GMO011	GMO017	155	31	0.2	0.0642575	0.628409	-0.168027	0.336053	0.240392
GMO008	GMO007	4177	974	0.23318	0.0130855	0.550228	-0.0300022	0.0600043	0.240392
GMO013	GMO003	45	8	0.17778	0.113988	0.549181	-0.260459	0.520918	0.240392
GMO022	GMO004	22624	5379	0.23776	0.00566058	0.46285	-0.01095	0.0219	0.240392
GMO008	GMO005	4801	1127	0.23474	0.0122338	0.461017	-0.0235128	0.0470256	0.240392
GMO019	GMO004	909	207	0.22772	0.0278186	0.45509	-0.052715	0.10543	0.240392
GMO023	GMO005	8877	2099	0.23645	0.00901956	0.43572	-0.0163994	0.0327988	0.240392
GMO022	GMO019	1985	461	0.23224	0.0189553	0.429431	-0.0339124	0.0678249	0.240392
GMO019	GMO005	5717	1348	0.23579	0.0112283	0.408788	-0.0191449	0.0382898	0.240392
GMO008	GMO020	17	3	0.17647	0.184919	0.345611	-0.265908	0.531816	0.240392
GMO002	GMO007	631	145	0.22979	0.0334954	0.316163	-0.0441041	0.0882082	0.240392
GMO022	GMO002	276	62	0.22464	0.0502424	0.313281	-0.0655274	0.131055	0.240392
GMO023	GMO020	26	5	0.19231	0.154585	0.310962	-0.200016	0.400032	0.240392
GMO019	GMO012	7192	1709	0.23763	0.0100378	0.273964	-0.0114908	0.0229815	0.240392
GMO002	GMO004	122	27	0.22131	0.075168	0.253698	-0.0793798	0.15876	0.240392
GMO020	GMO017	11	2	0.18182	0.232584	0.251781	-0.243653	0.487306	0.240392
GMO008	GMO016	6	1	0.16667	0.304293	0.242234	-0.306675	0.61335	0.240392
GMO014	GMO017	6	1	0.16667	0.304293	0.242234	-0.306675	0.61335	0.240392
GMO020	GMO003	15	3	0.2	0.206559	0.195489	-0.168027	0.336053	0.240392
GMO016	GMO012	358	83	0.23184	0.0446076	0.191447	-0.0355764	0.0711528	0.240392
GMO019	GMO003	46	10	0.21739	0.121631	0.189015	-0.0956865	0.191373	0.240392
GMO019	GMO017	41	9	0.21951	0.129285	0.161426	-0.0868676	0.173735	0.240392
GMO013	GMO009	5795	1385	0.239	0.0112046	0.123164	-0.00579174	0.0115835	0.240392
GMO023	GMO016	5	1	0.2	0.357771	0.112866	-0.168027	0.336053	0.240392
GMO023	GMO003	57	13	0.22807	0.111152	0.11075	-0.0512591	0.102518	0.240392
GMO002	GMO011	31	7	0.22581	0.150191	0.0970097	-0.0606604	0.121321	0.240392
GMO013	GMO006	4117	985	0.23925	0.013298	0.0849751	-0.00475177	0.00950355	0.240392
GMO023	GMO008	90	21	0.23333	0.0891658	0.0790662	-0.0293782	0.0587564	0.240392
GMO022	GMO008	1699	406	0.23896	0.0206919	0.068626	-0.00595814	0.0119163	0.240392
GMO013	GMO016	9	2	0.22222	0.277159	0.065522	-0.0755943	0.151189	0.240392
GMO013	GMO004	790	189	0.23924	0.0303569	0.0375533	-0.00479337	0.00958675	0.240392
GMO015	GMO019	3437	825	0.24003	0.0145704	0.0240213	-0.00150708	0.00301416	0.240392
GMO019	GMO021	2822	678	0.24026	0.0160851	0.0074603	-0.000550309	0.00110062	0.240392
GMO017	GMO003	25	6	0.24	0.170833	0.00222439	-0.00163187	0.00326375	0.240392
GMO002	GMO020	4	1	0.25	0.433013	-0.0222164	0.0399668	-0.0799336	0.240392
GMO019	GMO016	4	1	0.25	0.433013	-0.0222164	0.0399668	-0.0799336	0.240392
GMO019	GMO013	70	17	0.24286	0.102505	-0.0241938	0.0102653	-0.0205307	0.240392
GMO015	GMO020	877	212	0.24173	0.0289139	-0.0466903	0.0055647	-0.0111294	0.240392
GMO008	GMO004	735	178	0.24218	0.0316037	-0.0569553	0.00743664	-0.0148733	0.240392
GMO018	GMO008	4769	1151	0.24135	0.0123926	-0.0782728	0.00398395	-0.00796789	0.240392
GMO015	GMO008	2905	702	0.24165	0.0158849	-0.07995	0.00523191	-0.0104638	0.240392
GMO022	GMO023	3149	761	0.24166	0.0152573	-0.0838942	0.00527351	-0.010547	0.240392
GMO008	GMO001	5937	1433	0.24137	0.0111072	-0.0891317	0.00406714	-0.00813429	0.240392
GMO020	GMO011	72	18	0.25	0.102062	-0.0942564	0.0399668	-0.0799336	0.240392
GMO021	GMO016	149	37	0.24832	0.0707879	-0.112166	0.0329782	-0.0659564	0.240392
GMO019	GMO020	11	3	0.27273	0.268564	-0.120455	0.134521	-0.269041	0.240392
GMO020	GMO021	695	170	0.2446	0.0326103	-0.129407	0.0175035	-0.035007	0.240392
GMO002	GMO012	901	220	0.24417	0.0286237	-0.132408	0.0157148	-0.0314295	0.240392
GMO004	GMO020	245	61	0.24898	0.0552529	-0.155648	0.0357237	-0.0714475	0.240392
GMO023	GMO017	50	13	0.26	0.124064	-0.158144	0.0815655	-0.163131	0.240392
GMO008	GMO021	2439	593	0.24313	0.0173722	-0.158299	0.0113885	-0.022777	0.240392
GMO021	GMO003	1463	357	0.24402	0.0224582	-0.162079	0.0150908	-0.0301816	0.240392
GMO020	GMO014	3	1	0.33333	0.54433	-0.17076	0.386609	-0.773217	0.240392
GMO013	GMO012	6159	1492	0.24225	0.0109187	-0.171266	0.00772783	-0.0154557	0.240392
GMO002	GMO013	18	5	0.27778	0.211144	-0.17713	0.155528	-0.311056	0.240392
GMO002	GMO015	436	108	0.24771	0.0413477	-0.177277	0.0304407	-0.0608814	0.240392
GMO023	GMO011	489	121	0.24744	0.0390284	-0.180894	0.0293175	-0.0586351	0.240392
GMO021	GMO017	1419	347	0.24454	0.0228202	-0.182295	0.0172539	-0.0345078	0.240392
GMO020	GMO005	1418	347	0.24471	0.0228336	-0.189633	0.0179611	-0.0359222	0.240392
GMO013	GMO005	5007	1216	0.24286	0.0121201	-0.204618	0.0102653	-0.0205307	0.240392
GMO002	GMO001	906	224	0.24724	0.0286651	-0.239315	0.0284856	-0.0569711	0.240392
GMO008	GMO009	5568	1354	0.24318	0.0114985	-0.24351	0.0115965	-0.023193	0.240392
GMO008	GMO006	3904	952	0.24385	0.0137449	-0.252458	0.0143836	-0.0287672	0.240392
GMO019	GMO007	4985	1214	0.24353	0.0121582	-0.259084	0.0130525	-0.0261049	0.240392
GMO004	GMO011	3485	851	0.24419	0.0145546	-0.261774	0.015798	-0.0315959	0.240392
GMO013	GMO008	59	16	0.27119	0.115757	-0.266161	0.128114	-0.256229	0.240392
GMO019	GMO001	7186	1750	0.24353	0.0101265	-0.311066	0.0130525	-0.0261049	0.240392
GMO015	GMO017	1786	441	0.24692	0.0204074	-0.320472	0.0271544	-0.0543088	0.240392
GMO004	GMO014	38	11	0.28947	0.14714	-0.333628	0.204157	-0.408314	0.240392
GMO020	GMO010	1716	425	0.24767	0.0208407	-0.349796	0.0302743	-0.0605486	0.240392
GMO002	GMO005	727	183	0.25172	0.0321924	-0.352257	0.0471218	-0.0942435	0.240392
GMO002	GMO017	5	2	0.4	0.438178	-0.364281	0.663947	-1.32789	0.240392
GMO016	GMO003	5	2	0.4	0.438178	-0.364281	0.663947	-1.32789	0.240392
GMO014	GMO003	2	1	0.5	0.707107	-0.367158	1.07993	-2.15987	0.240392
GMO002	GMO009	843	212	0.25148	0.0298861	-0.37141	0.0461234	-0.0922468	0.240392
GMO023	GMO007	7712	1883	0.24416	0.0097836	-0.386361	0.0156732	-0.0313463	0.240392
GMO002	GMO010	880	222	0.25227	0.0292815	-0.406058	0.0494097	-0.0988194	0.240392
GMO002	GMO019	11	4	0.36364	0.290082	-0.424914	0.512694	-1.02539	0.240392
GMO013	GMO020	11	4	0.36364	0.290082	-0.424914	0.512694	-1.02539	0.240392
GMO011	GMO003	119	33	0.27731	0.0820758	-0.44995	0.153573	-0.307146	0.240392
GMO002	GMO008	14	5	0.35714	0.25612	-0.45588	0.485655	-0.97131	0.240392
GMO006	GMO017	2328	579	0.24871	0.017918	-0.464896	0.0346006	-0.0692011	0.240392
GMO022	GMO014	76	22	0.28947	0.104044	-0.471821	0.204157	-0.408314	0.240392
GMO006	GMO014	184	50	0.27174	0.0655905	-0.478118	0.130402	-0.260805	0.240392
GMO002	GMO018	751	192	0.25566	0.0318366	-0.47995	0.0635116	-0.127023	0.240392
GMO013	GMO011	301	80	0.26578	0.0509238	-0.498784	0.10561	-0.211219	0.240392
GMO019	GMO009	6779	1665	0.24561	0.0104561	-0.500188	0.021705	-0.04341	0.240392
GMO018	GMO020	1425	359	0.25193	0.0230003	-0.502167	0.0479953	-0.0959907	0.240392
GMO002	GMO003	10	4	0.4	0.309839	-0.515171	0.663947	-1.32789	0.240392
GMO018	GMO023	8787	2154	0.24513	0.00917791	-0.517547	0.0197082	-0.0394165	0.240392
GMO014	GMO011	13	5	0.38462	0.269865	-0.53449	0.599968	-1.19994	0.240392
GMO004	GMO021	33029	8024	0.24294	0.00471951	-0.542429	0.0105981	-0.0211963	0.240392
GMO015	GMO014	146	41	0.28082	0.0743852	-0.543657	0.168174	-0.336348	0.240392
GMO018	GMO016	266	72	0.27068	0.0544849	-0.556117	0.125993	-0.251986	0.240392
GMO004	GMO017	412	109	0.26456	0.0434627	-0.556339	0.100534	-0.201069	0.240392
GMO018	GMO014	219	60	0.27397	0.0602749	-0.55728	0.139679	-0.279358	0.240392
GMO022	GMO011	7786	1915	0.24595	0.00976104	-0.570636	0.0231193	-0.0462387	0.240392
GMO016	GMO009	324	87	0.26852	0.0492433	-0.571448	0.117008	-0.234015	0.240392
GMO023	GMO004	1308	333	0.25459	0.0240904	-0.589861	0.0590606	-0.118121	0.240392
GMO008	GMO011	264	72	0.27273	0.0548204	-0.590109	0.134521	-0.269041	0.240392
GMO019	GMO010	7006	1727	0.2465	0.0102978	-0.594301	0.0254073	-0.0508145	0.240392
GMO022	GMO020	504	133	0.26389	0.0392643	-0.598763	0.0977474	-0.195495	0.240392
GMO013	GMO007	4365	1084	0.24834	0.0130789	-0.608613	0.0330614	-0.0661228	0.240392
GMO016	GMO001	356	96	0.26966	0.0470409	-0.622437	0.12175	-0.2435	0.240392
GMO002	GMO023	18	7	0.38889	0.229809	-0.646233	0.617731	-1.23546	0.240392
GMO006	GMO016	245	68	0.27755	0.0572165	-0.649638	0.154571	-0.309142	0.240392
GMO021	GMO011	11331	2784	0.2457	0.00808855	-0.65772	0.0220794	-0.0441587	0.240392
GMO006	GMO020	1162	299	0.25731	0.0256483	-0.660082	0.0703754	-0.140751	0.240392
GMO008	GMO003	38	13	0.34211	0.153921	-0.660924	0.423132	-0.846264	0.240392
GMO022	GMO013	1803	458	0.25402	0.0205036	-0.66525	0.0566895	-0.113379	0.240392
GMO022	GMO016	121	36	0.29752	0.0831213	-0.687429	0.237644	-0.475287	0.240392
GMO015	GMO013	3109	781	0.25121	0.0155567	-0.696162	0.0450002	-0.0900005	0.240392
GMO017	GMO010	3511	880	0.25064	0.014628	-0.701394	0.0426291	-0.0852582	0.240392
GMO014	GMO007	190	55	0.28947	0.0658031	-0.746014	0.204157	-0.408314	0.240392
GMO018	GMO003	2851	720	0.25254	0.0162739	-0.747211	0.0505329	-0.101066	0.240392
GMO014	GMO005	220	63	0.28636	0.0609557	-0.754318	0.19122	-0.382439	0.240392
GMO008	GMO012	5952	1482	0.24899	0.0112102	-0.768052	0.0357653	-0.0715307	0.240392
GMO014	GMO021	103	32	0.31068	0.0911966	-0.770862	0.292388	-0.584775	0.240392
GMO015	GMO023	5526	1378	0.24937	0.0116402	-0.772325	0.0373461	-0.0746922	0.240392
GMO018	GMO017	2894	732	0.25294	0.016161	-0.777181	0.0521968	-0.104394	0.240392
GMO014	GMO010	276	78	0.28261	0.0542059	-0.779066	0.17562	-0.35124	0.240392
GMO016	GMO005	285	81	0.28421	0.0534343	-0.82026	0.182276	-0.364552	0.240392
GMO013	GMO001	6152	1535	0.24951	0.0110341	-0.827432	0.0379285	-0.0758569	0.240392
GMO017	GMO012	3620	914	0.25249	0.0144413	-0.838567	0.0503249	-0.10065	0.240392
GMO015	GMO003	1692	437	0.25827	0.0212809	-0.84066	0.0743689	-0.148738	0.240392
GMO004	GMO006	53599	13063	0.24372	0.00370884	-0.90055	0.0138428	-0.0276857	0.240392
GMO003	GMO009	3275	833	0.25435	0.0152198	-0.917886	0.0580622	-0.116124	0.240392
GMO013	GMO010	5995	1503	0.25071	0.0111956	-0.922686	0.0429203	-0.0858406	0.240392
GMO018	GMO013	5013	1262	0.25175	0.01226	-0.927409	0.0472466	-0.0944931	0.240392
GMO017	GMO001	3630	926	0.2551	0.0144704	-1.01725	0.0611821	-0.122364	0.240392
GMO008	GMO010	5765	1453	0.25204	0.0114368	-1.01952	0.0484529	-0.0969059	0.240392
GMO015	GMO004	39968	9785	0.24482	0.00430152	-1.03219	0.0184187	-0.0368374	0.240392
GMO004	GMO003	408	117	0.28676	0.0447793	-1.03575	0.192884	-0.385767	0.240392
GMO014	GMO009	264	79	0.29924	0.0563667	-1.04423	0.244799	-0.489597	0.240392
GMO022	GMO003	983	267	0.27162	0.0283735	-1.10103	0.129903	-0.259806	0.240392
GMO020	GMO001	1752	462	0.2637	0.0210545	-1.1076	0.096957	-0.193914	0.240392
GMO020	GMO007	1276	342	0.26803	0.0247995	-1.11494	0.114969	-0.229938	0.240392
GMO023	GMO012	11039	2755	0.24957	0.0082379	-1.11558	0.0381781	-0.0763561	0.240392
GMO023	GMO001	11019	2755	0.25002	0.00825033	-1.16844	0.04005	-0.0801	0.240392
GMO003	GMO005	2763	719	0.26022	0.016694	-1.18845	0.0824806	-0.164961	0.240392
GMO006	GMO003	2303	604	0.26227	0.0183318	-1.1941	0.0910084	-0.182017	0.240392
GMO015	GMO011	13845	3452	0.24933	0.00735352	-1.2171	0.0371797	-0.0743594	0.240392
GMO007	GMO003	2482	651	0.26229	0.0176589	-1.24074	0.0910916	-0.182183	0.240392
GMO007	GMO016	248	78	0.31452	0.0589693	-1.25727	0.308361	-0.616723	0.240392
GMO014	GMO012	286	89	0.31119	0.0547532	-1.29326	0.294509	-0.589018	0.240392
GMO022	GMO017	1008	280	0.27778	0.0282153	-1.32552	0.155528	-0.311056	0.240392
GMO020	GMO012	1758	472	0.26849	0.0211395	-1.32974	0.116883	-0.233765	0.240392
GMO014	GMO001	283	89	0.31449	0.055201	-1.34255	0.308237	-0.616473	0.240392
GMO020	GMO009	1647	445	0.27019	0.0218838	-1.36219	0.123955	-0.247909	0.240392
GMO007	GMO017	2557	676	0.26437	0.0174422	-1.3754	0.0997441	-0.199488	0.240392
GMO003	GMO010	3376	882	0.26126	0.0151221	-1.38076	0.0868069	-0.173614	0.240392
GMO003	GMO012	3497	915	0.26165	0.0148653	-1.43085	0.0884293	-0.176859	0.240392
GMO022	GMO021	77020	18859	0.24486	0.00309885	-1.4457	0.0185851	-0.0371702	0.240392
GMO023	GMO010	10747	2714	0.25254	0.00838196	-1.45074	0.0505329	-0.101066	0.240392
GMO006	GMO011	18519	4626	0.2498	0.00636218	-1.48062	0.0391348	-0.0782696	0.240392
GMO023	GMO009	10264	2599	0.25322	0.00858454	-1.49571	0.0533616	-0.106723	0.240392
GMO004	GMO005	65884	16172	0.24546	0.00335329	-1.51493	0.021081	-0.042162	0.240392
GMO004	GMO007	57165	14065	0.24604	0.00360282	-1.57099	0.0234937	-0.0469874	0.240392
GMO003	GMO001	3495	926	0.26495	0.0149296	-1.64573	0.102157	-0.204314	0.240392
GMO007	GMO011	19837	4986	0.25135	0.00615986	-1.78088	0.0455826	-0.0911652	0.240392
GMO017	GMO009	3370	908	0.26944	0.0152853	-1.90117	0.120835	-0.241669	0.240392
GMO018	GMO004	66644	16446	0.24677	0.0033401	-1.91312	0.0265304	-0.0530609	0.240392
GMO022	GMO015	94624	23253	0.24574	0.00279916	-1.91486	0.0222458	-0.0444915	0.240392
GMO004	GMO009	78907	19447	0.24645	0.00306826	-1.97832	0.0251993	-0.0503985	0.240392
GMO011	GMO005	22917	5775	0.252	0.00573591	-2.02583	0.0482865	-0.0965731	0.240392
GMO011	GMO009	27644	6946	0.25127	0.0052175	-2.08721	0.0452498	-0.0904997	0.240392
GMO017	GMO005	2900	798	0.27517	0.0165863	-2.09751	0.144671	-0.289341	0.240392
GMO004	GMO012	83677	20707	0.24746	0.00298363	-2.37295	0.0294007	-0.0588015	0.240392
GMO018	GMO011	23265	5923	0.25459	0.00571211	-2.4877	0.0590606	-0.118121	0.240392
GMO022	GMO006	125959	31052	0.24652	0.00242872	-2.52808	0.0254905	-0.0509809	0.240392
GMO022	GMO005	154844	38110	0.24612	0.00218931	-2.62183	0.0238265	-0.047653	0.240392
GMO015	GMO021	139493	34383	0.24649	0.0023078	-2.64754	0.0253657	-0.0507313	0.240392
GMO011	GMO012	29526	7538	0.2553	0.00507509	-2.93985	0.0620141	-0.124028	0.240392
GMO022	GMO018	155175	38337	0.24706	0.00218978	-3.05053	0.0277368	-0.0554736	0.240392
GMO004	GMO001	83702	20923	0.24997	0.00299327	-3.20386	0.039842	-0.079684	0.240392
GMO011	GMO001	29499	7590	0.2573	0.00509041	-3.3239	0.0703338	-0.140668	0.240392
GMO011	GMO010	28774	7472	0.25968	0.00516962	-3.73335	0.0802343	-0.160469	0.240392
GMO021	GMO007	201646	49953	0.24773	0.0019227	-3.82275	0.0305239	-0.0610478	0.240392
GMO004	GMO010	81500	20605	0.25282	0.00304487	-4.08555	0.0516976	-0.103395	0.240392
GMO018	GMO021	233136	57836	0.24808	0.00178899	-4.30411	0.0319799	-0.0639597	0.240392
GMO022	GMO012	193260	48205	0.24943	0.00196847	-4.59748	0.0375957	-0.0751913	0.240392
GMO022	GMO001	192945	48169	0.24965	0.00197066	-4.70402	0.0385108	-0.0770217	0.240392
GMO022	GMO009	178707	44726	0.25028	0.00204938	-4.83074	0.0411316	-0.0822631	0.240392
GMO021	GMO009	277042	68898	0.24869	0.00164246	-5.05947	0.0345174	-0.0690347	0.240392
GMO015	GMO006	236123	58937	0.2496	0.00178127	-5.17608	0.0383029	-0.0766057	0.240392
GMO021	GMO001	298188	74495	0.24983	0.00158558	-5.95998	0.0392596	-0.0785192	0.240392
GMO015	GMO005	299609	74863	0.24987	0.0015819	-5.99913	0.039426	-0.078852	0.240392
GMO022	GMO010	187354	47301	0.25247	0.00200732	-6.02294	0.0502417	-0.100483	0.240392
GMO006	GMO007	343520	85660	0.24936	0.00147633	-6.08265	0.0373045	-0.074609	0.240392
GMO015	GMO007	257206	64506	0.2508	0.00170943	-6.09559	0.0432947	-0.0865894	0.240392
GMO021	GMO012	298385	74988	0.25131	0.00158817	-6.88213	0.0454162	-0.0908324	0.240392
GMO015	GMO018	300877	75602	0.25127	0.0015815	-6.88588	0.0452498	-0.0904997	0.240392
GMO018	GMO006	401642	100411	0.25	0.00136651	-7.03986	0.0399668	-0.0799336	0.240392
GMO021	GMO010	289698	73118	0.25239	0.0016141	-7.44067	0.0499089	-0.0998178	0.240392
GMO006	GMO001	528359	132108	0.25003	0.00119147	-8.09923	0.0400916	-0.0801832	0.240392
GMO006	GMO009	488109	122268	0.25049	0.00124038	-8.15071	0.0420051	-0.0840103	0.240392
GMO007	GMO005	436453	109700	0.25134	0.00131321	-8.34596	0.045541	-0.091082	0.240392
GMO005	GMO009	646012	161173	0.24949	0.00107675	-8.46065	0.0378453	-0.0756905	0.240392
GMO018	GMO007	438845	110377	0.25152	0.00130994	-8.50422	0.0462898	-0.0925796	0.240392
GMO015	GMO009	365823	92463	0.25275	0.00143705	-8.60789	0.0514064	-0.102813	0.240392
GMO018	GMO005	518348	130215	0.25121	0.00120481	-8.98899	0.0450002	-0.0900005	0.240392
GMO015	GMO001	396878	100450	0.2531	0.00138032	-9.21528	0.0528624	-0.105725	0.240392
GMO007	GMO012	581898	146501	0.25176	0.00113794	-10.0005	0.0472882	-0.0945763	0.240392
GMO015	GMO012	397242	101033	0.25434	0.00138191	-10.102	0.0580206	-0.116041	0.240392
GMO007	GMO009	535570	135215	0.25247	0.00118725	-10.1832	0.0502417	-0.100483	0.240392
GMO015	GMO010	384970	98055	0.25471	0.00140444	-10.2034	0.0595598	-0.11912	0.240392
GMO006	GMO012	528697	133557	0.25262	0.00119517	-10.2412	0.0508656	-0.101731	0.240392
GMO007	GMO001	581301	147309	0.25341	0.00114099	-11.4199	0.0541519	-0.108304	0.240392
GMO006	GMO010	512231	130283	0.25434	0.00121696	-11.4712	0.0580206	-0.116041	0.240392
GMO005	GMO001	701547	177174	0.25255	0.00103745	-11.7307	0.0505745	-0.101149	0.240392
GMO018	GMO009	657625	166377	0.253	0.00107216	-11.7706	0.0524464	-0.104893	0.240392
GMO018	GMO001	713591	180684	0.2532	0.00102953	-12.4523	0.0532784	-0.106557	0.240392
GMO007	GMO010	563438	143701	0.25504	0.00116139	-12.6228	0.0609325	-0.121865	0.240392
GMO005	GMO012	701753	177920	0.25354	0.00103864	-12.6704	0.0546927	-0.109385	0.240392
GMO018	GMO012	713540	180967	0.25362	0.00103013	-12.8527	0.0550255	-0.110051	0.240392
GMO018	GMO010	691408	176252	0.25492	0.00104825	-13.8707	0.0604333	-0.120867	0.240392
GMO005	GMO010	679823	173533	0.25526	0.00105761	-14.0695	0.0618477	-0.123695	0.240392
GMO001	GMO009	1004996	255751	0.25448	0.000868969	-16.2261	0.058603	-0.117206	0.240392
GMO009	GMO012	1002389	255196	0.25459	0.000870222	-16.3292	0.0590606	-0.118121	0.240392
GMO001	GMO012	1093622	279016	0.25513	0.000833715	-17.6919	0.0613069	-0.122614	0.240392
GMO010	GMO009	973731	249549	0.25628	0.000884856	-17.969	0.0660908	-0.132182	0.240392
GMO001	GMO010	1059703	271761	0.25645	0.000848388	-18.9418	0.0667979	-0.133596	0.240392
GMO010	GMO012	1057056	271217	0.25658	0.00084959	-19.068	0.0673387	-0.134677	0.240392

## Sheet: 7
Supplementary Data 7. Haplogrep3 results
Sample	Haplogrep assignment	Haplogrep rank	Haplogrep quality	Fasta range	Supporting variants (after visual inspection)	Haplogroup
GMO001	L3	1	1	9750-9918 9925-9942 2785-2900 2988-3143 674-844 6161-6282 2351-2376 2382-2444 2509-2590 6476-6576 1990-2062 15573-15582 15584-15586 15588-15592 15599-15604 15610-15668 13333-13396 12451-12503	73G;263G;750G;2706G;7028T;9055A;9698C;10398G;10550G;11299C ;11467G;11719A;12308G;12372A;13117G;14167T;14798C;15326G;16093C;16224C	K1a3 (85%)
GMO001	L3a	2	1	9750-9918 9925-9942 2785-2900 2988-3143 674-844 6161-6282 2351-2376 2382-2444 2509-2590 6476-6576 1990-2062 15573-15582 15584-15586 15588-15592 15599-15604 15610-15668 13333-13396 12451-12503	na	na
GMO001	L3b'f	3	1	9750-9918 9925-9942 2785-2900 2988-3143 674-844 6161-6282 2351-2376 2382-2444 2509-2590 6476-6576 1990-2062 15573-15582 15584-15586 15588-15592 15599-15604 15610-15668 13333-13396 12451-12503	na	na
GMO002	mtMRCA	1	0.5	na	na	na
GMO002	L0	2	0.5	na	na	na
GMO002	L0a'b'f'g'k	3	0.5	na	na	na
GMO003	mtMRCA	1	0.5	na	na	na
GMO003	L0	2	0.5	na	na	na
GMO003	L0a'b'f'g'k	3	0.5	na	na	na
GMO004	mtMRCA	1	0.5	na	15172A;15326G
GMO004	L0	2	0.5	na	na	na
GMO004	L0a'b'f'g'k	3	0.5	na	na	na
GMO005	H3am	1	0.946	9721-9963 10031-10439 10475-10476 10495-10512 10531-10667 10677-10965 11066-11427 11529-11534 11551-11569 11694-11894 11970-12158 12176-13050 13067-13324 13326-13329 13333-13514 13548-13592 13629-14130 14132-14220 14271-14407 14436-14507 14544-14589 14627-14895 14904-14989 14992-15001 15003-15005 15031 15037-16386 16390-16554 2150-2453 2455-2462 2524-2566 2623-2681 2693-2695 2699-2709 2711-2926 2…	152C;263G;750G;1438G;4769G;13477A;15326G;16519C	H+152C! (95%)
GMO005	H3+152!	2	0.9388	9721-9963 10031-10439 10475-10476 10495-10512 10531-10667 10677-10965 11066-11427 11529-11534 11551-11569 11694-11894 11970-12158 12176-13050 13067-13324 13326-13329 13333-13514 13548-13592 13629-14130 14132-14220 14271-14407 14436-14507 14544-14589 14627-14895 14904-14989 14992-15001 15003-15005 15031 15037-16386 16390-16554 2150-2453 2455-2462 2524-2566 2623-2681 2693-2695 2699-2709 2711-2926 2…	na	na
GMO005	H3i	3	0.9388	9721-9963 10031-10439 10475-10476 10495-10512 10531-10667 10677-10965 11066-11427 11529-11534 11551-11569 11694-11894 11970-12158 12176-13050 13067-13324 13326-13329 13333-13514 13548-13592 13629-14130 14132-14220 14271-14407 14436-14507 14544-14589 14627-14895 14904-14989 14992-15001 15003-15005 15031 15037-16386 16390-16554 2150-2453 2455-2462 2524-2566 2623-2681 2693-2695 2699-2709 2711-2926 2…	na	na
GMO006	H5a+152C!	1	0.9606	7850-7943 8114-8184 8423-8483 8630-8733 9019-9096 9286-9365 9503-9504 9506-9566 9723-9983 9990-10427 10531-10695 10697-10951 11060-11125 11127 11129-11132 11136-11496 11552-11573 11590-11591 11685-11939 11960 11971-13515 13518-14212 14232-14416 14426-14505 14520-14591 14641-14906 14914-14990 15003 15017-16559 2665-3422 3435-3439 3441-3481 3483-3491 3496-3944 18-281 284 286-295 300-653 702-754 800…	152C;263G;456T;750G;1438G;2626C;4336C;4769G;6040G;15326G;15553A;16304C	H5a+152C! (95%)
GMO006	H5	2	0.9528	7850-7943 8114-8184 8423-8483 8630-8733 9019-9096 9286-9365 9503-9504 9506-9566 9723-9983 9990-10427 10531-10695 10697-10951 11060-11125 11127 11129-11132 11136-11496 11552-11573 11590-11591 11685-11939 11960 11971-13515 13518-14212 14232-14416 14426-14505 14520-14591 14641-14906 14914-14990 15003 15017-16559 2665-3422 3435-3439 3441-3481 3483-3491 3496-3944 18-281 284 286-295 300-653 702-754 800…	na	na
GMO006	H5a	3	0.9528	7850-7943 8114-8184 8423-8483 8630-8733 9019-9096 9286-9365 9503-9504 9506-9566 9723-9983 9990-10427 10531-10695 10697-10951 11060-11125 11127 11129-11132 11136-11496 11552-11573 11590-11591 11685-11939 11960 11971-13515 13518-14212 14232-14416 14426-14505 14520-14591 14641-14906 14914-14990 15003 15017-16559 2665-3422 3435-3439 3441-3481 3483-3491 3496-3944 18-281 284 286-295 300-653 702-754 800…	na	na
GMO007	J1c1	1	0.9704	7848-7920 8120-8213 8423-8486 8494-8496 8503-8506 8636-8747 9031-9106 9270-9370 9509-9557 9729-9996 10009-10013 10015-10437 10439-10442 10447-10449 10453-10465 10474-10995 10997 11056-11487 11512-11537 11544-11577 11734-11914 11945-11948 11952-12818 12820-12827 12829-13507 13513-13588 13606-14216 14230-14236 14246-14423 14426 14430-14513 14515-14607 14610 14612-14613 14623-14989 15030-16549 2687-…	73G;185A;228A;263G;295T;462T;482C;489C;750G;1438G;2706G;3010A;3394C;4216C;4769G;7028T;10398G;11251G;11719A;12612G;13708A;14766T;14798C;15326G;15452A;16069T;16126C;16192T	J1c1 (97%)
GMO007	J1c1b	2	0.9704	7848-7920 8120-8213 8423-8486 8494-8496 8503-8506 8636-8747 9031-9106 9270-9370 9509-9557 9729-9996 10009-10013 10015-10437 10439-10442 10447-10449 10453-10465 10474-10995 10997 11056-11487 11512-11537 11544-11577 11734-11914 11945-11948 11952-12818 12820-12827 12829-13507 13513-13588 13606-14216 14230-14236 14246-14423 14426 14430-14513 14515-14607 14610 14612-14613 14623-14989 15030-16549 2687-…	na	na
GMO007	J1c1b1	3	0.9704	7848-7920 8120-8213 8423-8486 8494-8496 8503-8506 8636-8747 9031-9106 9270-9370 9509-9557 9729-9996 10009-10013 10015-10437 10439-10442 10447-10449 10453-10465 10474-10995 10997 11056-11487 11512-11537 11544-11577 11734-11914 11945-11948 11952-12818 12820-12827 12829-13507 13513-13588 13606-14216 14230-14236 14246-14423 14426 14430-14513 14515-14607 14610 14612-14613 14623-14989 15030-16549 2687-…	na	na
GMO008	mtMRCA	1	0.5	na	na	na
GMO008	L0	2	0.5	na	na	na
GMO008	L0a'b'f'g'k	3	0.5	na	na	na
GMO009	H3am	1	0.9678	8638-8742 9036-9089 9275-9365 9501-9554 9720-9986 10001-10076 10093-10187 10197-10199 10203-10428 10430-10433 10464-10490 10496-10506 10545-10676 10707-10945 11064-11120 11155-11417 11450-11463 11677-11899 11972-12131 12182-13057 13086-13203 13205-13307 13332-13419 13429-13431 13443-13444 13449-13594 13627-13677 13679-13681 13683-14116 14130-14205 14263-14424 14428-14431 14438-14599 14638-14700 1…	263G;750G;3798T;4769G;15326G;16519C	H3am (96%)
GMO009	H102	2	0.9587	8638-8742 9036-9089 9275-9365 9501-9554 9720-9986 10001-10076 10093-10187 10197-10199 10203-10428 10430-10433 10464-10490 10496-10506 10545-10676 10707-10945 11064-11120 11155-11417 11450-11463 11677-11899 11972-12131 12182-13057 13086-13203 13205-13307 13332-13419 13429-13431 13443-13444 13449-13594 13627-13677 13679-13681 13683-14116 14130-14205 14263-14424 14428-14431 14438-14599 14638-14700 1…	na	na
GMO009	H	3	0.9518	8638-8742 9036-9089 9275-9365 9501-9554 9720-9986 10001-10076 10093-10187 10197-10199 10203-10428 10430-10433 10464-10490 10496-10506 10545-10676 10707-10945 11064-11120 11155-11417 11450-11463 11677-11899 11972-12131 12182-13057 13086-13203 13205-13307 13332-13419 13429-13431 13443-13444 13449-13594 13627-13677 13679-13681 13683-14116 14130-14205 14263-14424 14428-14431 14438-14599 14638-14700 1…	na	na
GMO010	U8b1b1	1	0.9409	7842-7941 8016-8077 8118-8217 8417-8504 8635-8759 9033-9104 9266-9384 9498 9500-9561 9724-9991 10015 10020-10438 10465-10466 10470-11005 11007-11011 11056-11059 11061-11121 11124-11126 11142-11431 11510-11611 11650-11659 11661-11664 11722-11944 11949-14213 14241-14516 14524-14600 14625-14628 14630-15133 15147-16547 1648-1784 1846-1915 1975-3948 28-66 87-1064 6130-6312 6355-6616 6652-6716 5301-550…	73G;195C;263G;750G;1438G;2706G;3480G;4769G;5165T;6340T;7028T;8038C;8417T;9055A;9698C;11467G;11719A;12372A;14053G;14167T;14766T;15080G;15326G;16189C;16234T;16239T;16324C;16519C	U8b1b1 (96%)
GMO010	U8b1b	2	0.9325	7842-7941 8016-8077 8118-8217 8417-8504 8635-8759 9033-9104 9266-9384 9498 9500-9561 9724-9991 10015 10020-10438 10465-10466 10470-11005 11007-11011 11056-11059 11061-11121 11124-11126 11142-11431 11510-11611 11650-11659 11661-11664 11722-11944 11949-14213 14241-14516 14524-14600 14625-14628 14630-15133 15147-16547 1648-1784 1846-1915 1975-3948 28-66 87-1064 6130-6312 6355-6616 6652-6716 5301-550…	na	na
GMO010	U8b1	3	0.9243	7842-7941 8016-8077 8118-8217 8417-8504 8635-8759 9033-9104 9266-9384 9498 9500-9561 9724-9991 10015 10020-10438 10465-10466 10470-11005 11007-11011 11056-11059 11061-11121 11124-11126 11142-11431 11510-11611 11650-11659 11661-11664 11722-11944 11949-14213 14241-14516 14524-14600 14625-14628 14630-15133 15147-16547 1648-1784 1846-1915 1975-3948 28-66 87-1064 6130-6312 6355-6616 6652-6716 5301-550…	na	na
GMO011	U1a1a	1	0.9149	11748-11885 11977-12143 12148-12151 12172-12314 12319-12354 12399-13046 13100-13195 13211-13307 13330 13332-13409 13435-13504 13545-13599 13614-13623 13625-13628 13630-13655 13659-13668 13685-14113 14136-14213 14278-14328 14338 14378-14383 14447-14517 14525-14527 14533-14578 14641-14704 14758-14890 14917-14984 15017-15138 15164-15169 15172-15368 15372-15373 15375-15376 15378-15380 15387-16184 161…	73G;385G;750G;1438G;2218T;2706G;3158.1T (Insertion);3543T;3591A;4769G;4991A;6026A;7581C;11719A;12308G;12879C;13104G;13422G;14070G;14364A;14766T;15148A;15326G;15954C;16249C	U1a1a (97%)
GMO011	U1a1a2	2	0.9149	11748-11885 11977-12143 12148-12151 12172-12314 12319-12354 12399-13046 13100-13195 13211-13307 13330 13332-13409 13435-13504 13545-13599 13614-13623 13625-13628 13630-13655 13659-13668 13685-14113 14136-14213 14278-14328 14338 14378-14383 14447-14517 14525-14527 14533-14578 14641-14704 14758-14890 14917-14984 15017-15138 15164-15169 15172-15368 15372-15373 15375-15376 15378-15380 15387-16184 161…	na	na
GMO011	U1a1a1	3	0.9084	11748-11885 11977-12143 12148-12151 12172-12314 12319-12354 12399-13046 13100-13195 13211-13307 13330 13332-13409 13435-13504 13545-13599 13614-13623 13625-13628 13630-13655 13659-13668 13685-14113 14136-14213 14278-14328 14338 14378-14383 14447-14517 14525-14527 14533-14578 14641-14704 14758-14890 14917-14984 15017-15138 15164-15169 15172-15368 15372-15373 15375-15376 15378-15380 15387-16184 161…	na	na
GMO012	H2c	1	0.9653	7855-7944 8011-8070 8072 8079 8106-8238 8412-8556 8626-8750 9034-9120 9255-9386 9505-9564 9712-10438 10468-10983 11060-11616 11652-14228 14234-14238 14246 14248-14602 14631-16381 16385-16387 16389-16556 1655-1812 1845-1918 1964-2473 2489-3948 9-228 245-309 311-1072 6136-6618 6620-6623 6644-6745 1233-1428 4850-5044 5302-5496 4270-4376 6893-6979 5802-5865 7230-7289	263G;310C;750G;4769G;13708A;13934T;15326G;16311C	H2c (96%)
GMO012	H3am	2	0.9612	7855-7944 8011-8070 8072 8079 8106-8238 8412-8556 8626-8750 9034-9120 9255-9386 9505-9564 9712-10438 10468-10983 11060-11616 11652-14228 14234-14238 14246 14248-14602 14631-16381 16385-16387 16389-16556 1655-1812 1845-1918 1964-2473 2489-3948 9-228 245-309 311-1072 6136-6618 6620-6623 6644-6745 1233-1428 4850-5044 5302-5496 4270-4376 6893-6979 5802-5865 7230-7289	na	na
GMO012	H3+16311T!	3	0.9587	7855-7944 8011-8070 8072 8079 8106-8238 8412-8556 8626-8750 9034-9120 9255-9386 9505-9564 9712-10438 10468-10983 11060-11616 11652-14228 14234-14238 14246 14248-14602 14631-16381 16385-16387 16389-16556 1655-1812 1845-1918 1964-2473 2489-3948 9-228 245-309 311-1072 6136-6618 6620-6623 6644-6745 1233-1428 4850-5044 5302-5496 4270-4376 6893-6979 5802-5865 7230-7289	na	na
GMO013	mtMRCA	1	0.5	na	709A;750G;4917G;6261A;8697A;10463C;11251G;11719A;11812G;13368A;14233G;15326G;15607G;16126C;16519C	T2c1 (72%)
GMO013	L0	2	0.5	na	na	na
GMO013	L0a'b'f'g'k	3	0.5	na	na	na
GMO014	mtMRCA	1	0.5	na	na	na
GMO014	L0	2	0.5	na	na	na
GMO014	L0a'b'f'g'k	3	0.5	na	na	na
GMO015	H1e	1	0.9627	3-677 682 686-1071 1223-1462 1502-1577 1603-1811 1817-1823 1844-1942 2023-3972 4037-4117 4250-4382 4838-5059 5283-5517 5776-5879 6191-6602 6641-6750 6874-7004 7188-7324 7641-7711 7805-7954 8000-8248 8398-8565 8613-8762 9016-9125 9257-9394 9477-9611 9700-11631 11635-16564	263G;750G;1438G;3010A;4769G;5460A;6779G;15326G;16172C;16224C;16519C	H1e (96%)
GMO015	H1e8	2	0.9627	3-677 682 686-1071 1223-1462 1502-1577 1603-1811 1817-1823 1844-1942 2023-3972 4037-4117 4250-4382 4838-5059 5283-5517 5776-5879 6191-6602 6641-6750 6874-7004 7188-7324 7641-7711 7805-7954 8000-8248 8398-8565 8613-8762 9016-9125 9257-9394 9477-9611 9700-11631 11635-16564	na	na
GMO015	H1e8a	3	0.9627	3-677 682 686-1071 1223-1462 1502-1577 1603-1811 1817-1823 1844-1942 2023-3972 4037-4117 4250-4382 4838-5059 5283-5517 5776-5879 6191-6602 6641-6750 6874-7004 7188-7324 7641-7711 7805-7954 8000-8248 8398-8565 8613-8762 9016-9125 9257-9394 9477-9611 9700-11631 11635-16564	na	na
GMO016	mtMRCA	1	0.5	na	na	na
GMO016	L0	2	0.5	na	na	na
GMO016	L0a'b'f'g'k	3	0.5	na	na	na
GMO017	mtMRCA	1	0.5	na	na	na
GMO017	L0	2	0.5	na	na	na
GMO017	L0a'b'f'g'k	3	0.5	na	na	na
GMO018	K1a	1	0.9297	9733-9965 9970 10016-10185 10187-10191 10196-10227 10237-10411 10543-10935 10938-10939 10941-10943 11070-11118 11154 11156-11384 11391-11394 11397-11406 11455-11492 11548-11591 11728-11868 11884 11972-11973 11976-12107 12166-12388 12390-13056 13061-13310 13312-13500 13537-13593 13644-14197 14246-14420 14426-14491 14502-14503 14525 14527-14595 14641-14706 14754-14971 15008-15362 15364-16149 16154-…	73G;263G;497T;750G;1189C;1811G;2706G;3480G;5773A;6861A;7028T;9055A;9698C;10398G;10550G;11025C;11299C;11467G;11719A;12308G;12372A;14167T;14766T;14798C;15326G;16224C;16311C	K1a2a (97%)
GMO018	K1a2	2	0.9297	9733-9965 9970 10016-10185 10187-10191 10196-10227 10237-10411 10543-10935 10938-10939 10941-10943 11070-11118 11154 11156-11384 11391-11394 11397-11406 11455-11492 11548-11591 11728-11868 11884 11972-11973 11976-12107 12166-12388 12390-13056 13061-13310 13312-13500 13537-13593 13644-14197 14246-14420 14426-14491 14502-14503 14525 14527-14595 14641-14706 14754-14971 15008-15362 15364-16149 16154-…	na	na
GMO018	K1a2a	3	0.9297	9733-9965 9970 10016-10185 10187-10191 10196-10227 10237-10411 10543-10935 10938-10939 10941-10943 11070-11118 11154 11156-11384 11391-11394 11397-11406 11455-11492 11548-11591 11728-11868 11884 11972-11973 11976-12107 12166-12388 12390-13056 13061-13310 13312-13500 13537-13593 13644-14197 14246-14420 14426-14491 14502-14503 14525 14527-14595 14641-14706 14754-14971 15008-15362 15364-16149 16154-…	na	na
GMO019	mtMRCA	1	0.5	na	na	na
GMO019	L0	2	0.5	na	na	na
GMO019	L0a'b'f'g'k	3	0.5	na	na	na
GMO020	mtMRCA	1	0.5	na	na	na
GMO020	L0	2	0.5	na	na	na
GMO020	L0a'b'f'g'k	3	0.5	na	na	na
GMO022	mtMRCA	1	0.5	15624-15683 15718-15761 9827-9889 9894-9899 9903-9909 3759-3816 15287-15342 326-380	263G;3010A;4769G;5460A;15326G;16172C;16224C;16519C	H1e (88%)
GMO022	L0	2	0.5	15624-15683 15718-15761 9827-9889 9894-9899 9903-9909 3759-3816 15287-15342 326-380	na	na
GMO022	L0a'b'f'g'k	3	0.5	15624-15683 15718-15761 9827-9889 9894-9899 9903-9909 3759-3816 15287-15342 326-380	na	na

## Sheet: 8
Supplementary Data 8. Y haplogroup identification
GMO004													GMO006													GMO007													GMO009
subgroup_name	start	ancestral	derived	name	A	C	G	T	ancFreq	derFreq	diff		subgroup_name	start	ancestral	derived	name	A	C	G	T	ancFreq	derFreq	diff		subgroup_name	start	ancestral	derived	name	A	C	G	T	ancFreq	derFreq	diff		subgroup_name	start	ancestral	derived	name	A	C	G	T	ancFreq	derFreq
A0-T	22191266	G	C	L1155	0	1	0	0	0	1	1		A0-T	2790726	T	C	L1085	0	1	0	0	0	1	1		A0-T	6859819	T	C	L1101	0	1	0	0	0	1	1		A0-T	2790726	T	C	L1085	0	1	0	0	0	1
A00	16611917	C	T	FGC13215/YP1487	0	0	0	1	0	1	1		A0-T	6859819	T	C	L1101	0	2	0	0	0	2	2		A0-T	7590048	C	T	L1105	0	0	0	2	0	2	2		A0-T	6847637	C	A	L1098	2	0	0	0	0	2
A1b	18759708	C	A	L1053	1	0	0	0	0	1	1		A0-T	7590048	C	T	L1105	0	0	0	5	0	5	5		A0-T	13888035	A	C	L1116	0	2	0	0	0	2	2		A0-T	6847842	A	G	L1099	0	0	2	0	0	2
B2b1a2a~	23081407	C	T	Z38199	0	0	0	1	0	1	1		A0-T	13888035	A	C	L1116	0	1	0	0	0	1	1		A0-T	14231291	T	C	L1118	0	2	0	0	0	2	2		A0-T	6859819	T	C	L1101	0	1	0	0	0	1
BT	22191243	G	A	L1061/PF1101	1	0	0	0	0	1	1		A0-T	14231291	T	C	L1118	0	1	0	0	0	1	1		A0-T	14496439	G	T	L1120	0	0	0	2	0	2	2		A0-T	7590048	C	T	L1105	0	0	0	5	0	5
BT	17353147	A	G	L1220/M9212	0	0	2	0	0	2	2		A0-T	14496439	G	T	L1120	0	0	0	4	0	4	4		A0-T	14496448	G	A	L1121	2	0	0	0	0	2	2		A0-T	13888035	A	C	L1116	0	2	0	0	0	2
BT	21866840	A	T	M42	0	0	0	1	0	1	1		A0-T	14496448	G	A	L1121	2	0	0	0	0	2	2		A0-T	15425676	C	T	L1123	0	0	0	2	0	2	2		A0-T	14231291	T	C	L1118	0	3	0	0	0	3
BT	2842830	A	G	M8951	0	0	1	0	0	1	1		A0-T	15425676	C	T	L1123	0	0	0	3	0	3	3		A0-T	16428812	C	T	L1128	0	0	0	2	0	2	2		A0-T	14496439	G	T	L1120	0	0	0	8	0	8
BT	8677316	C	G	M9036	0	0	1	0	0	1	1		A0-T	16281810	A	G	L1127	0	0	1	0	0	1	1		A0-T	16596846	T	C	L1129	0	1	0	0	0	1	1		A0-T	14496448	G	A	L1121	8	0	0	0	0	8
BT	14096790	C	A	M9081	1	0	0	0	0	1	1		A0-T	16661010	T	G	L1130	0	0	1	0	0	1	1		A0-T	16661010	T	G	L1130	0	0	2	0	0	2	2		A0-T	15425676	C	T	L1123	0	0	0	4	0	4
BT	15112480	C	T	M9128	0	0	0	1	0	1	1		A0-T	18147303	C	A	L1135	1	0	0	0	0	1	1		A0-T	18147303	C	A	L1135	2	0	0	0	0	2	2		A0-T	15467768	A	G	L1125	0	0	6	0	0	6
BT	17147159	C	T	M9197	0	0	0	1	0	1	1		A0-T	19047091	C	T	L1137	0	0	0	1	0	1	1		A0-T	21593345	A	G	L1143	0	0	2	0	0	2	2		A0-T	16281810	A	G	L1127	1	0	3	0	1	3
BT	17192307	G	C	M9199	0	1	0	0	0	1	1		A0-T	21593345	A	G	L1143	0	0	3	0	0	3	3		A0-T	21739790	C	T	L1145	0	0	0	1	0	1	1		A0-T	16428812	C	T	L1128	0	0	0	5	0	5
BT	17670193	G	A	M9227	1	0	0	0	0	1	1		A0-T	21739790	C	T	L1145	0	0	0	3	0	3	3		A0-T	21903971	A	G	L1150	0	0	1	0	0	1	1		A0-T	16661010	T	G	L1130	1	0	2	0	0	2
BT	17940510	C	A	M9240	1	0	0	0	0	1	1		A0-T	22191266	G	C	L1155	0	4	0	1	0	4	4		A0-T	22191266	G	C	L1155	0	5	0	0	0	5	5		A0-T	16718811	A	G	L1132	0	0	2	0	0	2
BT	17966904	C	A	M9242	2	0	0	0	0	2	2		A00	19524048	G	A	A2893	1	0	0	0	0	1	1		A00	19097297	G	A	FGC27188/YP3384	1	0	0	0	0	1	1		A0-T	18147303	C	A	L1135	1	0	0	0	0	1
BT	18067088	T	A	M9245	1	0	0	0	0	1	1		A00	16422266	C	T	FGC26663	0	0	0	1	0	1	1		A00-T	8000437	C	T	A21325	0	0	0	2	0	2	2		A0-T	18914286	A	G	L1136	0	0	1	0	0	1
BT	18242832	G	A	M9254	1	0	0	0	0	1	1		A00	22106570	T	C	FGC27566	0	1	0	0	0	1	1		A00-T	14060565	A	T	A21330	0	0	0	1	0	1	1		A0-T	19047091	C	T	L1137	0	0	0	3	0	3
BT	18585407	T	G	M9255	0	0	1	0	0	1	1		A00	23186945	G	A	FGC27842/YP3693	1	0	0	0	0	1	1		A00-T	14823508	A	G	A21331	0	0	1	0	0	1	1		A0-T	21288562	C	T	L1142	0	0	0	1	0	1
BT	19207843	C	A	M9282	1	0	0	0	0	1	1		A00	23449748	C	T	FGC27893	0	0	0	1	0	1	1		A00-T	21333111	C	T	A21347	0	0	0	1	0	1	1		A0-T	21593345	A	G	L1143	0	0	4	0	0	4
BT	21268114	C	G	M9312	0	0	1	0	0	1	1		A00-T	8484364	T	C	A21327	0	2	0	0	0	2	2		A00-T	24479585	T	C	A21354	0	1	0	0	0	1	1		A0-T	21903971	A	G	L1150	0	0	4	0	0	4
BT	21627877	C	T	M9334	0	0	0	1	0	1	1		A00-T	8750802	G	A	A21508	1	0	0	0	0	1	1		A00-T	7268643	A	G	A21503	0	0	1	0	0	1	1		A0-T	14289022	A	T	L1235	0	0	0	1	0	1
BT	22625732	C	T	M9356	0	0	0	1	0	1	1		A00-T	8837660	G	C	A21509	0	1	0	0	0	1	1		A00-T	14301669	A	G	A21511	0	0	1	0	0	1	1		A00	17439824	C	T	A2825/YP3210	0	0	0	1	0	1
BT	14886273	G	T	P97	0	0	0	1	0	1	1		A00-T	14301669	A	G	A21511	0	0	1	0	0	1	1		A00-T	17336145	T	C	A21524	0	1	0	0	0	1	1		A00	8121754	G	A	FGC25643/V1633/YP2628	1	0	0	0	0	1
BT	18262817	G	A	Y8320	1	0	0	0	0	1	1		A00-T	19240029	T	C	A21539	0	1	0	0	0	1	1		A00-T	17949678	T	A	A21530	1	0	0	0	0	1	1		A00	15106316	G	A	FGC26409/YP2950	1	0	0	0	0	1
BT	28787653	G	C	Z40384	0	3	0	0	0	3	3		A00-T	19301476	T	A	A21541	3	0	0	0	0	3	3		A00-T	19301476	T	A	A21541	2	0	0	0	0	2	2		A00-T	6783040	G	C	A21321	0	2	0	0	0	2
BT	8594070	G	A	Z40389	1	0	0	0	0	1	1		A00-T	22147146	T	A	A21551	2	0	0	0	0	2	2		A00-T	22177952	T	C	A21552	0	1	0	0	0	1	1		A00-T	6976525	G	A	A21322	2	0	0	0	0	2
BT	23201899	A	C	Z40411	0	1	0	0	0	1	1		A00-T	22810276	A	T	A21555	0	0	0	1	0	1	1		A00-T	23974816	C	G	A21560	0	0	2	0	0	2	2		A00-T	7645634	G	T	A21323	0	0	0	5	0	5
C1a2a2	8485673	G	A	Y10496/Z29347	1	0	0	0	0	1	1		A00-T~	17552685	C	G	A8844	0	0	1	0	0	1	1		A0a1a	6851720	G	A	V151	2	0	0	0	0	2	2		A00-T	7665890	C	T	A21324	0	0	0	5	0	5
C1b2a1c1	15948212	C	T	Z32337	0	0	0	1	0	1	1		A000-T	8581403	A	T	A8838	0	0	0	3	0	3	3		A1	22957136	G	A	L1084	3	0	0	0	0	3	3		A00-T	8000437	C	T	A21325	0	0	0	10	0	10
C2a1a1b1b	8886075	C	T	Y11605/Z30407	0	0	0	1	0	1	1		A0000	2825900	C	T	A8864	0	0	0	1	0	1	1		A1	8466995	G	A	L1112	1	0	0	0	0	1	1		A00-T	8050193	A	G	A21326	0	0	4	0	0	4
CT	6831340	C	T	CTS543/M5584	0	0	0	1	0	1	1		A0a1a	16181147	A	G	V161.1	0	0	1	0	0	1	1		A1	2710154	A	G	P305	0	0	1	0	0	1	1		A00-T	8484364	T	C	A21327	0	2	0	0	0	2
CT	7153375	C	T	M5591/PF223	0	0	0	1	0	1	1		A1	8466995	G	A	L1112	2	0	0	0	0	2	2		A1	4898665	C	G	V171	0	0	1	0	0	1	1		A00-T	8772556	A	G	A21328	1	0	2	0	1	2
CT	7597185	G	A	M5603/PF1415/V226	1	0	0	0	0	1	1		A1	16181147	A	G	V161.2	0	0	1	0	0	1	1		A1	4957608	A	G	V174	0	0	1	0	0	1	1		A00-T	9894894	A	G	A21329	0	0	4	0	0	4
CT	8526565	G	A	M5632	1	0	0	0	0	1	1		A1	17645335	A	G	V250	0	0	1	0	0	1	1		A1b	18759708	C	A	L1053	5	0	0	0	0	5	5		A00-T	14060565	A	T	A21330	0	0	0	7	0	7
CT	14207088	C	A	M5656	1	0	0	0	0	1	1		A1b	18180294	A	G	L1009	0	0	2	0	0	2	2		A1b	8349696	G	C	V1820	0	1	0	0	0	1	1		A00-T	14823508	A	G	A21331	0	0	4	0	0	4
CT	18940202	A	G	M5754	0	0	1	0	0	1	1		A1b	18759708	C	A	L1053	5	0	0	0	0	5	5		A1b	14774366	C	T	V2590	0	0	0	6	0	6	6		A00-T	15074709	T	C	A21332	0	6	0	0	0	6
CT	18948988	T	C	M5756/PF951	0	1	0	0	0	1	1		A1b	23551003	T	A	L989	1	0	0	0	0	1	1		A1b	19109333	C	T	V3785	0	0	0	1	0	1	1		A00-T	15238264	T	G	A21333	0	0	3	0	0	3
CT	18974195	C	T	M5760	0	0	0	1	0	1	1		A1b	15426248	C	T	P108	0	0	0	1	0	1	1		A1b	21217762	T	C	Y8291	0	1	0	0	0	1	1		A00-T	15437950	C	T	A21334	0	0	0	5	0	5
CT	21250559	C	G	M5775	0	0	2	0	0	2	2		A1b	8349696	G	C	V1820	0	3	0	0	0	3	3		B~	16698481	G	A	CTS6146/M9181	1	0	0	0	0	1	1		A00-T	15457365	C	T	A21335	0	0	0	1	0	1
CT	23126086	C	T	M5814	0	0	0	1	0	1	1		A1b	7589303	G	T	V221	0	0	0	1	0	1	1		B~	23607731	C	T	M8927	0	0	0	2	0	2	2		A00-T	15521974	T	A	A21336	2	0	0	0	0	2
CT	28789895	A	T	Y1580	0	0	0	1	0	1	1		A1b	14774366	C	T	V2590	0	0	0	1	0	1	1		B2b1a2a~	21182843	G	A	Z38166	1	0	0	0	0	1	1		A00-T	16787966	T	A	A21337	5	0	0	0	0	5
D2	17631594	C	T	FT54215	0	0	0	1	0	1	1		A1b	23446521	A	G	Y8300	0	0	1	0	0	1	1		B2b1b~	16779407	G	A	M7124	1	0	0	0	0	1	1		A00-T	17286125	A	C	A21338	0	3	0	0	0	3
E1a1	17415831	G	A	Z17457	1	0	0	0	0	1	1		A1b	2990766	T	C	Y9448^^	0	1	0	0	0	1	1		B3	14138540	G	A	L1390	1	0	0	0	0	1	1		A00-T	17314992	A	T	A21339	0	0	0	1	0	1
E1b1a1	21646710	C	T	Page106	0	0	0	1	0	1	1		A1b1a1a2a1a~	6662712	C	T	PF3627.1/V218.1	0	0	0	7	0	7	7		B3a	13679213	G	A	Z11559	1	0	0	0	0	1	1		A00-T	18068583	C	T	A21340	0	0	0	4	0	4
E1b1a1a1a1c1a1a3c2b1b~	7681017	C	T	Z37412	0	0	0	1	0	1	1		B2~	13657723	C	T	Z11793	0	0	0	1	0	1	1		B3a	15724866	G	A	Z11584	1	0	0	0	0	1	1		A00-T	18777067	T	G	A21341	0	0	4	0	0	4
E1b1a1a1a1c1a1a3d4	16951112	C	A	CTS6508	1	0	0	0	0	1	1		B2b1a1~	8651787	G	A	M8369/V2426	1	0	0	0	0	1	1		BT	22191243	G	A	L1061/PF1101	4	0	0	0	0	4	4		A00-T	18906821	G	A	A21342	2	0	0	0	0	2
E1b1a1a1a1c1b2a	23443721	C	T	M4297	0	0	0	1	0	1	1		B2b1a2~	19381920	G	A	M7694	1	0	0	0	0	1	1		BT	2669416	A	G	L1071/M8945	0	0	1	0	0	1	1		A00-T	19039593	C	A	A21343	8	0	0	0	0	8
E1b1b1a1	16925303	G	A	CTS6475/PF2144	1	0	0	0	0	1	1		B3~	15846385	C	T	Z5482	0	0	0	1	0	1	1		BT	17353147	A	G	L1220/M9212	0	0	2	0	0	2	2		A00-T	19039594	C	A	A21344	8	0	0	0	0	8
E1b1b1a1a1	13862889	G	A	FGC14370	1	0	0	0	0	1	1		BT	22191243	G	A	L1061/PF1101	8	0	0	0	0	8	8		BT	6932831	G	A	L413/PF1409/V31	4	0	0	0	0	4	4		A00-T	21297986	C	T	A21346	0	0	0	1	0	1
E1b1b1a1b1a10f~	6677325	C	T	A9479	0	0	0	1	0	1	1		BT	17353147	A	G	L1220/M9212	0	0	1	0	0	1	1		BT	10008803	C	G	L418	0	0	2	0	0	2	2		A00-T	21333111	C	T	A21347	0	0	0	6	0	6
E1b1b1b1b1a~	23768261	G	A	FGC18923/Y10561	1	0	0	0	0	1	1		BT	6932831	G	A	L413/PF1409/V31	4	0	0	0	0	4	4		BT	21253574	A	C	L438	0	1	0	0	0	1	1		A00-T	21988588	A	G	A21348	0	0	1	0	0	1
E1b1b1b2a1a1a1a1a1a1~	17562116	C	T	Z36157	0	0	0	1	0	1	1		BT	22178817	G	T	L440	0	0	0	1	0	1	1		BT	22178817	G	T	L440	0	0	0	2	0	2	2		A00-T	22063871	C	T	A21349	0	0	0	2	0	2
E2b1a1~	16598219	G	A	CTS5991/Z984	1	0	0	0	0	1	1		BT	17510373	C	T	L962	0	0	0	1	0	1	1		BT	17510373	C	T	L962	0	0	0	1	0	1	1		A00-T	22148539	G	T	A21350	0	0	0	3	0	3
F	21147336	T	C	F3136/M3741/PF2737	0	1	0	0	0	1	1		BT	21674225	T	C	L969	0	1	0	0	0	1	1		BT	21674225	T	C	L969	0	1	0	0	0	1	1		A00-T	23532272	C	T	A21352	0	0	0	1	0	1
F	22673903	T	G	F3335/M3754/PF2758	0	0	1	0	0	1	1		BT	9869354	C	A	M11760	1	0	0	0	0	1	1		BT	9869354	C	A	M11760	1	0	0	0	0	1	1		A00-T	23566217	G	A	A21353	3	0	0	0	0	3
F	8131538	G	T	F3692/M3650	0	0	0	1	0	1	1		BT	21866840	A	T	M42	0	0	0	1	0	1	1		BT	22748506	T	G	M299	0	0	2	0	0	2	2		A00-T	24479585	T	C	A21354	0	6	0	0	0	6
F	2756471	A	T	M3637/PF2589/V186	0	0	0	1	0	1	1		BT	2712956	G	A	M8947	1	0	0	0	0	1	1		BT	21866840	A	T	M42	0	0	0	1	0	1	1		A00-T	2765243	A	G	A21499	1	0	6	0	1	6
F	17493513	C	T	P158/PF2706	0	0	0	2	0	2	2		BT	2868656	A	T	M8953/PF1405/V216	0	0	0	2	0	2	2		BT	2712956	G	A	M8947	1	0	0	0	0	1	1		A00-T	7194612	G	A	A21501	6	0	0	0	0	6
G	14190447	A	G	CTS2125/M3511	0	0	1	0	0	1	1		BT	2889399	T	C	M8954	0	2	0	0	0	2	2		BT	2889399	T	C	M8954	0	2	0	0	0	2	2		A00-T	7268643	A	G	A21503	0	0	3	0	0	3
G	14243137	C	T	CTS2271/M3516	0	0	0	1	0	1	1		BT	2899711	A	G	M8955	0	0	1	0	0	1	1		BT	2906950	C	T	M8956	0	0	0	1	0	1	1		A00-T	7273302	A	G	A21504	0	0	3	0	0	3
G	6716150	T	C	CTS373/M3448	0	1	0	0	0	1	1		BT	2906950	C	T	M8956	0	0	0	1	0	1	1		BT	6859691	C	T	M8969/PF1407/V21	0	0	0	3	0	3	3		A00-T	8183705	G	A	A21506	1	0	0	0	0	1
G	16439267	G	A	CTS5699/M3542	1	0	0	0	0	1	1		BT	6634305	A	G	M8957	0	0	1	0	0	1	1		BT	6865490	A	G	M8970	0	0	1	0	0	1	1		A00-T	8438184	A	G	A21507	0	0	1	0	0	1
G	17281783	G	A	CTS7092/M3555/PF3006	2	0	0	0	0	2	2		BT	6719048	T	G	M8961	0	0	1	0	0	1	1		BT	6936412	G	C	M8971	0	1	0	0	0	1	1		A00-T	8750802	G	A	A21508	3	0	0	0	0	3
G	17610571	G	A	CTS7674/M3562/PF3015	1	0	0	0	0	1	1		BT	6779907	G	A	M8967	1	0	0	0	0	1	1		BT	7037901	G	C	M8976	0	2	0	0	0	2	2		A00-T	8837660	G	C	A21509	0	2	0	0	0	2
G	18979775	T	A	CTS9593/M3570	1	0	0	0	0	1	1		BT	6859691	C	T	M8969/PF1407/V21	0	0	0	4	0	4	4		BT	7171532	G	T	M8977	0	0	0	2	0	2	2		A00-T	9095130	G	C	A21510	0	7	0	0	0	7
G	16185081	A	G	F2076/L524/PF3136	0	0	1	0	0	1	1		BT	6865490	A	G	M8970	0	0	2	0	0	2	2		BT	7324963	A	G	M8986	0	0	2	0	0	2	2		A00-T	14816973	A	G	A21513	1	0	5	0	1	5
G	17533325	A	C	L522/PF3011	0	1	0	0	0	1	1		BT	6936412	G	C	M8971	0	1	0	0	0	1	1		BT	7531097	T	C	M8988	0	1	0	0	0	1	1		A00-T	14860080	G	A	A21514	1	0	0	0	0	1
G	7992031	T	C	M3258/PF2872	0	1	0	0	0	1	1		BT	7221998	C	A	M8979	1	0	0	0	0	1	1		BT	7621889	C	T	M8993	0	0	0	6	0	6	6		A00-T	14909481	T	C	A21515	0	1	0	0	0	1
G	8563874	C	T	M3485/PF2888	0	0	0	1	0	1	1		BT	7302697	G	A	M8983	1	0	0	0	0	1	1		BT	7661695	A	C	M8994	0	1	0	0	0	1	1		A00-T	15008055	G	T	A21516	0	0	0	7	0	7
G	21648433	C	G	M3593/PF3063	0	0	1	0	0	1	1		BT	7324963	A	G	M8986	0	0	2	0	0	2	2		BT	7838397	A	G	M9001	0	0	2	0	0	2	2		A00-T	15435646	C	A	A21517	6	0	0	0	0	6
G1a1a2b2a	18029400	G	A	BZ3813	1	0	0	0	0	1	1		BT	7531097	T	C	M8988	0	1	0	0	0	1	1		BT	7890655	C	G	M9003	1	0	2	0	0	2	2		A00-T	15550843	A	C	A21518	0	2	0	0	0	2
G2	8719593	G	A	F1393/M3270/PF2893	1	0	0	0	0	1	1		BT	7621889	C	T	M8993	0	0	0	2	0	2	2		BT	7904101	G	A	M9005	1	0	0	0	0	1	1		A00-T	15701527	T	C	A21519	0	1	0	0	0	1
G2a	23244026	C	T	P15/PF3112	0	0	0	1	0	1	1		BT	7735760	C	G	M8997	1	0	1	0	0	1	1		BT	7907933	G	A	M9006	2	0	0	0	0	2	2		A00-T	15964383	C	T	A21520	0	0	0	7	0	7
G2a1a	16284599	G	A	FGC612/Z6573	1	0	0	0	0	1	1		BT	7890655	C	G	M9003	1	0	6	0	0	6	6		BT	8021764	G	A	M9010	1	0	0	0	0	1	1		A00-T	16254215	C	G	A21521	0	0	7	0	0	7
G2a2b	18759690	C	T	L190/M485	0	0	0	1	0	1	1		BT	7904101	G	A	M9005	3	0	0	0	0	3	3		BT	8226191	C	A	M9017	1	0	0	0	0	1	1		A00-T	16310223	G	A	A21522	4	0	0	0	0	4
G2a2b1	19305343	G	A	M3377/S22095	1	0	0	0	0	1	1		BT	7907933	G	A	M9006	2	0	0	0	0	2	2		BT	8330559	T	C	M9019	0	1	0	0	0	1	1		A00-T	16544138	C	G	A21523	0	0	3	0	0	3
G2a2b2a	8687649	G	C	PF3330	0	1	0	0	0	1	1		BT	8021764	G	A	M9010	2	0	0	0	0	2	2		BT	8337827	T	C	M9020	0	2	0	0	0	2	2		A00-T	17336145	T	C	A21524	0	4	0	0	0	4
G2a2b2a1	28617051	C	T	CTS12570	0	0	0	1	0	1	1		BT	8057835	G	A	M9011	2	0	0	0	0	2	2		BT	8446082	A	T	M9025	0	0	0	2	0	2	2		A00-T	17576868	G	A	A21526	5	0	0	0	0	5
G2a2b2a1a1b	8418172	G	A	Z730	1	0	0	0	0	1	1		BT	8226191	C	A	M9017	2	0	0	0	0	2	2		BT	8596399	A	G	M9031	0	0	4	0	0	4	4		A00-T	17819925	G	A	A21527	1	0	0	0	0	1
G2a2b2a1a1b1a	23080197	A	G	CTS11352/Z759	0	0	1	0	0	1	1		BT	8330559	T	C	M9019	0	2	0	0	0	2	2		BT	8635293	C	A	M9032	5	0	0	0	0	5	5		A00-T	17853472	A	G	A21528	0	0	2	0	0	2
G2a2b2a1a1b1a1~	18409360	A	T	Z753	0	0	0	1	0	1	1		BT	8337827	T	C	M9020	0	2	0	0	0	2	2		BT	8662142	G	A	M9034	2	0	0	0	0	2	2		A00-T	17853637	A	C	A21529	0	1	0	0	0	1
G2a2b2a1a1b1a1a2a2a1	23592051	G	A	F3484.2	1	0	0	0	0	1	1		BT	8446082	A	T	M9025	0	0	0	6	0	6	6		BT	8869241	G	A	M9041	2	0	0	0	0	2	2		A00-T	17949678	T	A	A21530	5	0	0	0	0	5
G2a2b2a1a1b1a1a2a2d1~	14365543	G	A	Z40696	1	0	0	0	0	1	1		BT	8520679	C	A	M9027	1	0	0	0	0	1	1		BT	8881498	G	A	M9042	2	0	0	0	0	2	2		A00-T	18053502	G	A	A21531	2	0	0	0	0	2
H1a2a	21682092	G	A	Z14147	1	0	0	0	0	1	1		BT	8596399	A	G	M9031	0	0	4	0	0	4	4		BT	9106630	A	G	M9046	0	0	5	0	0	5	5		A00-T	18674223	A	T	A21533	0	0	0	3	0	3
H1a2b1a	6954541	G	A	Z14317	1	0	0	0	0	1	1		BT	8635293	C	A	M9032	4	0	0	0	0	4	4		BT	14018605	G	A	M9076	1	0	0	0	0	1	1		A00-T	18680521	G	T	A21534	0	0	0	1	0	1
H1a2b1a1~	7612093	C	T	M11083/V1270	0	0	0	1	0	1	1		BT	8662142	G	A	M9034	1	0	0	0	0	1	1		BT	14069414	C	T	M9079	0	0	0	1	0	1	1		A00-T	19046950	C	T	A21537	0	0	0	3	0	3
I	22200336	G	A	PF3822	1	0	0	0	0	1	1		BT	8677316	C	G	M9036	0	0	1	0	0	1	1		BT	14075450	C	T	M9080	0	0	0	1	0	1	1		A00-T	19080461	C	A	A21538	2	0	0	0	0	2
I1	14454653	G	A	CTS2738^/Z2759^	1	0	0	0	0	1	1		BT	8869241	G	A	M9041	1	0	0	0	0	1	1		BT	14096790	C	A	M9081	5	0	0	0	0	5	5		A00-T	19240029	T	C	A21539	0	6	0	0	0	6
I2a1b1a2b1a2a3b~	8572130	G	A	Y11154	1	0	0	0	0	1	1		BT	8881498	G	A	M9042	4	0	0	0	0	4	4		BT	14108214	T	A	M9083	1	0	0	0	0	1	1		A00-T	19249895	G	T	A21540	0	0	0	7	0	7
J (Notes)	21868533	G	A	L230	1	0	0	0	0	1	1		BT	9106630	A	G	M9046	0	0	1	0	0	1	1		BT	14386666	G	A	M9097	1	0	0	0	0	1	1		A00-T	19301476	T	A	A21541	1	0	0	0	0	1
J1a2a1a2d2b2b2c4d2a2a5a1d1a1a~	16314350	G	A	ZS8485	1	0	0	0	0	1	1		BT	9842503	T	C	M9057	0	1	0	0	0	1	1		BT	14461702	G	A	M9099	1	0	0	0	0	1	1		A00-T	21310642	G	T	A21543	0	0	0	3	0	3
J1a2a2a1~	8453180	C	T	FGC6040	0	0	0	1	0	1	1		BT	14013228	T	C	M9075	0	2	0	0	0	2	2		BT	14472914	C	T	M9100	0	0	0	3	0	3	3		A00-T	21402121	T	C	A21544	0	4	0	0	0	4
N1a1a1a1a	16828515	C	T	CTS6336/M2049	0	0	0	1	0	1	1		BT	14018605	G	A	M9076	1	0	0	0	0	1	1		BT	14588372	G	A	M9105	1	0	0	0	0	1	1		A00-T	21430317	C	T	A21545	0	0	0	1	0	1
O2a2a1a2a2	9823261	C	T	Y26416	0	0	0	1	0	1	1		BT	14075450	C	T	M9080	0	0	0	1	0	1	1		BT	14726334	A	C	M9112	0	1	0	0	0	1	1		A00-T	21709943	C	T	A21547	0	0	0	2	0	2
O2a2b1a1a1a1a2	24478400	C	T	F3660	0	0	0	1	0	1	1		BT	14108214	T	A	M9083	1	0	0	0	0	1	1		BT	14885368	C	T	M9118/Page81	0	0	0	1	0	1	1		A00-T	21733657	G	A	A21548	3	0	0	0	0	3
Q1a1b	16611917	C	T	FGC13215.2/YP1487.2	0	0	0	1	0	1	1		BT	14123744	C	T	M9087	0	0	0	1	0	1	1		BT	15063698	C	A	M9124	2	0	0	0	0	2	2		A00-T	22052999	C	T	A21549	0	0	0	2	0	2
R1a1a1b1a1a1a2e~	14327570	G	A	YP5950	1	0	0	0	0	1	1		BT	14344506	C	G	M9094	0	0	3	0	0	3	3		BT	15095089	C	T	M9126	0	0	0	1	0	1	1		A00-T	22144606	C	T	A21550	0	0	0	1	0	1
R1a1a1b1a3a1a2d1~	14914358	C	T	YP1440	0	0	0	1	0	1	1		BT	14386666	G	A	M9097	1	0	0	0	0	1	1		BT	15112480	C	T	M9128	0	0	0	5	0	5	5		A00-T	22147146	T	A	A21551	4	0	0	0	0	4
R1b1a1b1a1a2c1a2a1a1c	2738075	C	T	ZS347	0	0	0	1	0	1	1		BT	14401169	T	C	M9098	0	1	0	0	0	1	1		BT	15256839	A	G	M9133	0	0	1	0	0	1	1		A00-T	22177952	T	C	A21552	0	10	0	0	0	10
R1b1b2a1	18045957	C	T	SK2066	0	0	0	1	0	1	1		BT	14461702	G	A	M9099	1	0	0	0	0	1	1		BT	15381787	C	G	M9135	0	0	1	0	0	1	1		A00-T	22558617	T	C	A21553	0	5	0	0	0	5
S1a	21612650	G	A	Z41341	1	0	0	0	0	1	1		BT	14472914	C	T	M9100	0	0	0	1	0	1	1		BT	15382324	C	G	M9136	0	0	4	0	0	4	4		A00-T	22810276	A	T	A21555	0	0	0	6	0	6
T1a1a1a1b1a	19397234	G	A	PF7453	1	0	0	0	0	1	1		BT	14588372	G	A	M9105	4	0	0	0	0	4	4		BT	15450357	C	A	M9138	1	0	0	0	0	1	1		A00-T	23159597	G	A	A21556	5	0	0	0	0	5
													BT	14713690	T	A	M9109	1	0	0	0	0	1	1		BT	15542606	A	T	M9141	0	0	0	3	0	3	3		A00-T	23352212	C	T	A21557	0	0	0	6	0	6
													BT	14720802	G	A	M9110	1	0	0	0	0	1	1		BT	15558761	G	T	M9142	0	0	0	2	0	2	2		A00-T	23958217	C	T	A21559	0	0	0	2	0	2
													BT	14723798	T	C	M9111	0	1	0	0	0	1	1		BT	15569966	T	C	M9143	0	3	0	0	0	3	3		A00-T	23974816	C	G	A21560	0	0	8	0	0	8
													BT	14839376	T	C	M9117	0	2	0	1	1	2	1		BT	15905094	G	T	M9152	0	0	0	1	0	1	1		A00-T	15467231	A	G	A21739	1	0	3	0	1	3
													BT	14980170	C	T	M9121	0	0	0	1	0	1	1		BT	15995289	C	T	M9157	0	0	0	1	0	1	1		A00-T	21868167	T	C	A21740	0	2	0	0	0	2
													BT	15112480	C	T	M9128	0	0	0	3	0	3	3		BT	16332337	C	T	M9166	0	0	0	1	0	1	1		A00-T	21894527	C	T	A21741	0	0	0	5	0	5
													BT	15132194	T	G	M9129	0	0	3	0	0	3	3		BT	16403627	G	A	M9169	1	0	0	0	0	1	1		A00-T	21905071	T	C	A21742	0	4	0	0	0	4
													BT	15256839	A	G	M9133	0	0	1	0	0	1	1		BT	16538095	C	T	M9173	0	0	0	1	0	1	1		A00-T	3407219	A	C	A8833	0	4	0	0	0	4
													BT	15382324	C	G	M9136	0	0	7	0	0	7	7		BT	16542464	A	C	M9174/S1572	0	2	0	0	0	2	2		A00-T	14223272	C	T	A8841	0	0	0	3	0	3
													BT	15514552	T	C	M9140	0	2	0	0	0	2	2		BT	16913677	T	C	M9187	0	2	0	0	0	2	2		A00-T	15776449	T	C	A8843	0	3	0	0	0	3
													BT	15542606	A	T	M9141	0	0	0	1	0	1	1		BT	16959883	A	G	M9189	0	0	4	0	0	4	4		A00-T	19011949	A	C	A8849	0	3	0	0	0	3
													BT	15569966	T	C	M9143	0	2	0	0	0	2	2		BT	17041558	G	A	M9193	1	0	0	0	0	1	1		A00-T	23511507	G	A	A8853	5	0	0	0	0	5
													BT	15656524	G	C	M9146	0	1	0	0	0	1	1		BT	17063750	T	A	M9195	2	0	0	0	0	2	2		A00-T	18888394	A	G	PR2921	0	0	3	0	0	3
													BT	15905094	G	T	M9152	0	0	0	1	0	1	1		BT	17147159	C	T	M9197	0	0	0	1	0	1	1		A00-T~	6787694	C	T	A8834	0	0	0	3	0	3
													BT	16332337	C	T	M9166	0	0	0	3	0	3	3		BT	17192307	G	C	M9199	0	3	0	0	0	3	3		A00-T~	9447822	A	T	A8839	0	0	0	3	0	3
													BT	16538095	C	T	M9173	0	0	0	1	0	1	1		BT	17324151	A	G	M9210	0	0	2	0	0	2	2		A00-T~	14599389	G	A	A8842	2	0	0	0	0	2
													BT	16542464	A	C	M9174/S1572	0	2	0	0	0	2	2		BT	17372321	G	A	M9213	1	0	0	0	0	1	1		A00-T~	18894222	A	G	A8847	0	0	1	0	0	1
													BT	16766467	A	G	M9182	0	0	1	0	0	1	1		BT	17504731	G	A	M9218	2	0	0	0	0	2	2		A000-T	7628234	A	G	A8835	0	0	1	0	0	1
													BT	16913677	T	C	M9187	0	3	0	0	0	3	3		BT	17620657	C	T	M9221	0	0	0	2	0	2	2		A000-T	7816364	C	G	A8836	0	0	3	0	0	3
													BT	16959883	A	G	M9189	0	0	3	0	0	3	3		BT	17670179	C	T	M9226	0	0	0	4	0	4	4		A000-T	7905288	T	G	A8837	0	0	4	0	0	4
													BT	17041558	G	A	M9193	1	0	0	0	0	1	1		BT	17670193	G	A	M9227	4	0	0	0	0	4	4		A000-T	8581403	A	T	A8838	0	0	0	5	0	5
													BT	17063750	T	A	M9195	2	0	0	0	0	2	2		BT	17753892	G	A	M9231	1	0	0	0	0	1	1		A000-T	17878622	C	G	A8845	0	0	4	0	0	4
													BT	17192307	G	C	M9199	0	1	0	0	0	1	1		BT	17886479	G	A	M9237	1	0	0	0	0	1	1		A000-T	19011940	G	T	A8848	0	0	0	4	0	4
													BT	17270785	C	A	M9204	1	0	0	0	0	1	1		BT	17903900	T	G	M9238	0	0	1	0	0	1	1		A000-T	22996423	T	A	A8852	4	0	0	0	0	4
													BT	17298439	G	A	M9209	5	0	0	0	0	5	5		BT	17909260	G	A	M9239	1	0	0	0	0	1	1		A0000	17529461	C	T	A8944	0	1	0	2	1	2
													BT	17324151	A	G	M9210	0	0	2	0	0	2	2		BT	17940510	C	A	M9240	5	0	0	0	0	5	5		A0a1a	16181147	A	G	V161.1	0	0	2	0	0	2
													BT	17388578	A	G	M9214	0	0	1	0	0	1	1		BT	17966904	C	A	M9242	2	0	0	0	0	2	2		A1	16392856	A	T	L1002	0	0	0	2	0	2
													BT	17393971	C	T	M9215	0	0	0	2	0	2	2		BT	18053867	T	A	M9244	1	0	0	0	0	1	1		A1	16773792	T	C	L1004	0	3	0	1	1	3
													BT	17504731	G	A	M9218	1	0	0	0	0	1	1		BT	18067088	T	A	M9245	2	0	0	0	0	2	2		A1	22957136	G	A	L1084	2	0	0	0	0	2
													BT	17511829	T	C	M9219	0	3	0	1	1	3	2		BT	18069115	G	A	M9246	1	0	0	0	0	1	1		A1	8466995	G	A	L1112	3	0	0	0	0	3
													BT	17623760	G	A	M9223	1	0	0	0	0	1	1		BT	18113973	G	A	M9248	4	0	0	0	0	4	4		A1	8087059	G	A	L986	5	0	0	0	0	5
													BT	17642965	C	T	M9225	0	0	0	1	0	1	1		BT	18585407	T	G	M9255	0	0	1	0	0	1	1		A1	2710154	A	G	P305	0	0	3	0	0	3
													BT	17670179	C	T	M9226	0	0	0	1	0	1	1		BT	18589521	G	A	M9257	1	0	0	0	0	1	1		A1	16181147	A	G	V161.2	0	0	2	0	0	2
													BT	17670193	G	A	M9227	1	0	0	0	0	1	1		BT	18814791	G	A	M9263	3	0	0	0	0	3	3		A1	17947672	G	A	V168	2	0	0	0	0	2
													BT	17674985	G	T	M9228	0	0	0	2	0	2	2		BT	18917853	C	T	M9267	0	0	0	1	0	1	1		A1	4898665	C	G	V171	0	0	2	0	0	2
													BT	17728330	T	C	M9230	0	1	0	0	0	1	1		BT	19207843	C	A	M9282	2	0	0	0	0	2	2		A1	4957608	A	G	V174	0	0	1	0	0	1
													BT	17886479	G	A	M9237	2	0	0	0	0	2	2		BT	19233322	T	C	M9284	0	1	0	0	0	1	1		A1	7658712	C	T	V241	0	0	0	3	0	3
													BT	17903900	T	G	M9238	0	0	1	0	0	1	1		BT	19249565	C	G	M9286	0	0	1	0	0	1	1		A1	17645335	A	G	V250	0	0	1	0	0	1
													BT	17940510	C	A	M9240	4	0	0	0	0	4	4		BT	19306455	A	C	M9288/PF985/V3998	0	1	0	0	0	1	1		A1b	18180294	A	G	L1009	0	0	2	0	0	2
													BT	17966904	C	A	M9242	1	0	0	0	0	1	1		BT	19325165	C	T	M9290	0	0	0	1	0	1	1		A1b	21646577	C	A	L1013	3	0	0	0	0	3
													BT	18053867	T	A	M9244	1	0	0	0	0	1	1		BT	19337259	T	C	M9291	0	1	0	0	0	1	1		A1b	18759708	C	A	L1053	11	0	0	0	0	11
													BT	18067088	T	A	M9245	1	0	0	0	0	1	1		BT	19416000	C	G	M9293	0	0	2	0	0	2	2		A1b	23551003	T	A	L989	7	0	0	0	0	7
													BT	18069115	G	A	M9246	3	0	0	0	0	3	3		BT	19457726	G	A	M9296	1	0	0	0	0	1	1		A1b	8349696	G	C	V1820	0	4	0	0	0	4
													BT	18113973	G	A	M9248	3	0	0	0	0	3	3		BT	19519830	T	C	M9298/Z12903	0	1	0	0	0	1	1		A1b	7589303	G	T	V221	0	0	0	5	0	5
													BT	18162272	G	A	M9252	4	0	0	0	0	4	4		BT	21069381	G	A	M9300	1	0	0	0	0	1	1		A1b	14774366	C	T	V2590	0	0	0	4	0	4
													BT	18585407	T	G	M9255	0	0	3	0	0	3	3		BT	21122071	A	G	M9303	0	0	1	0	0	1	1		A1b	19109333	C	T	V3785	0	0	0	8	0	8
													BT	18814791	G	A	M9263	1	0	0	0	0	1	1		BT	21259569	C	T	M9311	0	0	0	2	0	2	2		A1b	19390790	C	A	V4076	2	0	0	0	0	2
													BT	18917853	C	T	M9267	0	0	0	3	0	3	3		BT	21289152	T	G	M9315	0	0	2	0	0	2	2		A1b	4794693	T	C	Y10848^^	0	2	0	0	0	2
													BT	19149592	C	A	M9280	3	0	0	0	0	3	3		BT	21311141	C	T	M9317	0	0	0	1	0	1	1		A1b	4501479	C	A	Y10870^^	7	0	0	0	0	7
													BT	19207843	C	A	M9282	6	0	0	0	0	6	6		BT	21326695	A	G	M9319	0	0	1	0	0	1	1		A1b	5249920	C	T	Y10882^^	0	0	0	5	0	5
													BT	19233322	T	C	M9284	0	1	0	0	0	1	1		BT	21391240	G	A	M9321	2	0	0	0	0	2	2		A1b	7427431	A	G	Y8278	0	0	3	0	0	3
													BT	19235631	C	T	M9285	0	0	0	4	0	4	4		BT	21486590	T	C	M9325	0	2	0	0	0	2	2		A1b	14394777	C	A	Y8281	2	0	0	0	0	2
													BT	19306455	A	C	M9288/PF985/V3998	0	3	0	0	0	3	3		BT	21490191	A	G	M9326	0	0	1	0	0	1	1		A1b	16307001	A	G	Y8285	0	0	1	0	0	1
													BT	19325165	C	T	M9290	0	0	0	1	0	1	1		BT	21627877	C	T	M9334	0	0	0	3	0	3	3		A1b	17758428	T	G	Y8289	0	0	3	0	0	3
													BT	19337259	T	C	M9291	0	1	0	0	0	1	1		BT	21637759	A	G	M9335	0	0	3	0	0	3	3		A1b	21217762	T	C	Y8291	0	2	0	0	0	2
													BT	19391922	T	C	M9292	0	1	0	0	0	1	1		BT	21698424	G	C	M9340	0	1	0	0	0	1	1		A1b	23011519	A	G	Y8294	0	0	2	0	0	2
													BT	19416000	C	G	M9293	0	0	1	0	0	1	1		BT	21968581	G	T	M9343	0	0	0	1	0	1	1		A1b	23032020	A	T	Y8295	0	0	0	10	0	10
													BT	21122071	A	G	M9303	0	0	2	0	0	2	2		BT	22719912	G	A	M9357	1	0	0	0	0	1	1		A1b	23125773	C	A	Y8296	2	0	0	0	0	2
													BT	21259569	C	T	M9311	0	0	0	1	0	1	1		BT	22727889	C	T	M9359	0	0	0	2	0	2	2		A1b	23125972	A	C	Y8297	0	2	0	0	0	2
													BT	21268114	C	G	M9312	0	0	2	0	0	2	2		BT	22730555	A	G	M9360	0	0	2	0	0	2	2		A1b	23264209	A	G	Y8298	0	0	2	0	0	2
													BT	21289152	T	G	M9315	0	0	1	0	0	1	1		BT	22817840	G	C	M9365	0	1	0	1	0	1	1		A1b	23446521	A	G	Y8300	0	0	3	0	0	3
													BT	21311141	C	T	M9317	0	0	0	2	0	2	2		BT	22879049	T	C	M9367	0	1	0	0	0	1	1		A1b	23596262	C	G	Y8302	0	0	1	0	0	1
													BT	21326695	A	G	M9319	0	0	1	0	0	1	1		BT	22931502	C	T	M9370	0	0	0	1	0	1	1		A1b	24472112	A	G	Y8303	0	0	1	0	0	1
													BT	21391240	G	A	M9321	2	0	0	0	0	2	2		BT	23010471	C	T	M9373	0	0	0	4	0	4	4		A1b	6788449	T	C	Z11900	0	3	0	0	0	3
													BT	21567686	C	G	M9331	0	0	2	0	0	2	2		BT	23070865	A	C	M9376	0	2	0	0	0	2	2		A1b	22111732	T	C	Z17899	0	3	0	0	0	3
													BT	21627877	C	T	M9334	0	0	0	5	0	5	5		BT	23244049	G	C	M9379	0	2	0	0	0	2	2		A1b	23572106	G	A	Z17900	8	0	0	0	0	8
													BT	21646196	G	A	M9336/Page26	2	0	0	0	0	2	2		BT	23405276	T	C	M9389	0	1	0	0	0	1	1		B2~	16387247	C	T	CTS5599/M8783	0	0	0	1	0	1
													BT	21698424	G	C	M9340	0	1	0	0	0	1	1		BT	23565114	T	A	M9394	4	0	0	0	0	4	4		B2b1a1~	7081062	G	A	M8354	1	0	0	0	0	1
													BT	22625732	C	T	M9356	0	0	0	1	0	1	1		BT	21938158	C	A	M94	1	0	0	0	0	1	1		B2b1a2~	15942595	G	A	M7647	2	0	0	0	0	2
													BT	22719912	G	A	M9357	1	0	0	0	0	1	1		BT	14886273	G	T	P97	0	0	0	3	0	3	3		B2b1a2a~	21658897	G	A	Z38174	1	0	0	0	0	1
													BT	22727889	C	T	M9359	0	0	0	3	0	3	3		BT	2657176	T	C	SRY10831.1	0	2	0	0	0	2	2		BT	21183571	C	T	L1060/PF1021	0	0	0	2	0	2
													BT	22730555	A	G	M9360	0	0	2	0	0	2	2		BT	7126782	G	A	Y8310	1	0	0	0	0	1	1		BT	22191243	G	A	L1061/PF1101	4	0	0	0	0	4
													BT	22730777	T	C	M9361	0	1	0	0	0	1	1		BT	9381562	G	A	Y8311	1	0	0	0	0	1	1		BT	8613037	G	A	L1062/PF302	3	0	0	0	0	3
													BT	22798764	G	A	M9362	1	0	0	0	0	1	1		BT	18262817	G	A	Y8320	2	0	0	0	0	2	2		BT	17353147	A	G	L1220/M9212	0	0	4	0	0	4
													BT	22817840	G	C	M9365	0	1	0	0	0	1	1		BT	20817229	G	A	Y8322	1	0	0	0	0	1	1		BT	6932831	G	A	L413/PF1409/V31	4	0	0	0	0	4
													BT	22879049	T	C	M9367	0	1	0	0	0	1	1		BT	7021041	G	T	Z17365	0	0	0	1	0	1	1		BT	10008803	C	G	L418	0	0	3	0	0	3
													BT	22931502	C	T	M9370	0	0	0	2	0	2	2		BT	13806787	G	A	Z17371	3	0	0	0	0	3	3		BT	21253574	A	C	L438	0	5	1	0	0	5
													BT	23010471	C	T	M9373	0	0	0	3	0	3	3		BT	28746408	G	C	Z17390	0	2	0	0	0	2	2		BT	22178817	G	T	L440	0	0	0	7	0	7
													BT	23070865	A	C	M9376	0	1	0	0	0	1	1		BT	9930675	C	T	Z40372	0	0	0	1	0	1	1		BT	23117154	C	A	L604/PF1243	1	0	0	0	0	1
													BT	23244049	G	C	M9379	0	5	0	0	0	5	5		BT	13665248	G	A	Z40379	3	0	0	0	0	3	3		BT	17510373	C	T	L962	0	0	0	2	0	2
													BT	23565114	T	A	M9394	3	0	0	0	0	3	3		BT	13821858	C	G	Z40381	0	0	2	0	0	2	2		BT	21674225	T	C	L969	0	4	0	0	0	4
													BT	23757465	G	C	M9397	0	1	0	0	0	1	1		BT	28787653	G	C	Z40384	0	9	0	1	0	9	9		BT	9869354	C	A	M11760	2	0	0	0	0	2
													BT	21938158	C	A	M94	1	0	0	0	0	1	1		BT	7563503	G	A	Z40386	1	0	0	0	0	1	1		BT	15022370	G	A	M251/M9122	4	0	0	0	0	4
													BT	24377975	G	T	M9406	0	0	0	1	0	1	1		BT	8594070	G	A	Z40389	2	0	0	0	0	2	2		BT	22748506	T	G	M299	1	0	4	0	0	4
													BT	2790584	G	C	PF1404/V202/V29	0	1	0	0	0	1	1		BT	15261255	C	T	Z40392	0	0	0	2	0	2	2		BT	21866840	A	T	M42	0	0	0	4	0	4
													BT	7645425	A	G	PF1410/V235	0	0	1	0	0	1	1		BT	21248962	G	A	Z40394	1	0	0	0	0	1	1		BT	2842830	A	G	M8951	0	0	4	0	0	4
													BT	17287394	T	A	PF1412/V64	1	0	0	0	0	1	1		BT	13202478	G	A	Z40398	1	0	0	0	0	1	1		BT	2855637	C	T	M8952	0	0	0	2	0	2
													BT	15219209	T	A	PF713	1	0	0	0	0	1	1		BT	13596520	T	A	Z40400	1	0	0	0	0	1	1		BT	2868656	A	T	M8953/PF1405/V216	0	0	0	4	0	4
													BT	2657176	T	C	SRY10831.1	0	1	0	0	0	1	1		BT	13823056	T	A	Z40401	3	0	0	0	0	3	3		BT	2889399	T	C	M8954	0	4	0	0	0	4
													BT	28772048	C	T	Y10888	0	0	0	1	0	1	1		BT	13840089	T	C	Z40402	0	3	0	0	0	3	3		BT	2906950	C	T	M8956	0	0	0	5	0	5
													BT	9381562	G	A	Y8311	1	0	0	0	0	1	1		BT	23201899	A	C	Z40411	0	3	0	0	0	3	3		BT	6634305	A	G	M8957	0	0	1	0	0	1
													BT	13841677	A	G	Y8316	0	0	5	0	0	5	5		BT	23240528	C	G	Z40412	0	0	4	0	0	4	4		BT	6646548	T	C	M8958	0	2	0	0	0	2
													BT	18262817	G	A	Y8320	1	0	0	0	0	1	1		C	9982529	C	T	PF2639	0	0	0	1	0	1	1		BT	6691986	G	A	M8959	4	0	0	0	0	4
													BT	23190598	A	T	Y8325	0	0	0	1	0	1	1		C1a1~	21267106	C	T	Z4057	0	0	0	1	0	1	1		BT	6719048	T	G	M8961	0	0	2	0	0	2
													BT	18016799	T	A	Y9422	1	0	0	0	0	1	1		C1a2	9903503	G	A	Y11369/Z28833	1	0	0	0	0	1	1		BT	6779907	G	A	M8967	1	0	0	0	0	1
													BT	23237493	T	A	Z12129	2	0	0	0	0	2	2		C1a2	17970997	C	T	Y11440/Z28919	0	0	0	1	0	1	1		BT	6835056	A	G	M8968	0	0	7	0	0	7
													BT	7021041	G	T	Z17365	0	0	0	2	0	2	2		C1b1a2b	17833928	C	T	AM00719.1/F2610.1	0	0	0	1	0	1	1		BT	6859691	C	T	M8969/PF1407/V21	0	0	0	4	0	4
													BT	13806787	G	A	Z17371	1	0	0	0	0	1	1		C1b2a1c	16518148	A	G	Y25230	0	0	3	0	0	3	3		BT	6865490	A	G	M8970	0	0	7	0	0	7
													BT	28746408	G	C	Z17390	0	1	0	0	0	1	1		C1b2a1c2b	13691456	C	T	FT106487^^	0	0	0	1	0	1	1		BT	6936412	G	C	M8971	0	4	0	0	0	4
													BT	9930675	C	T	Z40372	0	0	0	1	0	1	1		C2	8773674	C	T	Y6681/Z3979	0	0	0	1	0	1	1		BT	6993202	C	T	M8972	0	0	0	2	0	2
													BT	13665248	G	A	Z40379	2	0	0	0	0	2	2		C2a1a4	17560176	T	C	F12267/Y11997/Z30622	0	1	0	0	0	1	1		BT	7171532	G	T	M8977	0	0	0	2	0	2
													BT	13862470	G	A	Z40382	1	0	0	0	0	1	1		C2a2	7171503	G	A	BY63635/MPB374	1	0	0	0	0	1	1		BT	7269376	C	T	M8980	0	0	0	2	0	2
													BT	15218792	T	C	Z40383	0	1	0	0	0	1	1		C2b1	8195260	G	A	Z3967	1	0	0	0	0	1	1		BT	7302697	G	A	M8983	1	0	0	0	0	1
													BT	28787653	G	C	Z40384	0	5	0	1	0	5	5		CF	15203676	A	G	CTS3818/M3690/PF2668	0	0	4	0	0	4	4		BT	7324963	A	G	M8986	0	0	4	0	0	4
													BT	8180027	A	G	Z40388	0	0	4	0	0	4	4		CF	16863259	C	G	CTS6376/M3711/PF2697	0	0	1	0	0	1	1		BT	7531097	T	C	M8988	0	2	0	0	0	2
													BT	8594070	G	A	Z40389	4	0	0	0	0	4	4		CT	19503081	C	A	CTS10512/M5772	1	0	0	0	0	1	1		BT	7621889	C	T	M8993	0	0	0	4	0	4
													BT	15261255	C	T	Z40392	0	0	0	3	0	3	3		CT	7256433	A	T	CTS1181/M5595	0	0	0	2	0	2	2		BT	7661695	A	C	M8994	0	7	0	0	0	7
													BT	16808769	T	C	Z40393	0	1	0	0	0	1	1		CT	23298645	T	C	CTS11827/M5816	0	1	0	0	0	1	1		BT	7735760	C	G	M8997	1	0	3	0	0	3
													BT	21248962	G	A	Z40394	2	0	0	0	0	2	2		CT	7275087	C	T	CTS1217/M5597	0	0	0	2	0	2	2		BT	7763132	C	T	M8999	0	0	0	7	0	7
													BT	7389079	T	C	Z40397	0	1	0	0	0	1	1		CT	14439817	G	A	CTS2711	2	0	0	0	0	2	2		BT	7815370	T	A	M9000	1	0	0	0	0	1
													BT	13823056	T	A	Z40401	3	0	0	0	0	3	3		CT	14917660	C	G	CTS3431/M5669	1	0	1	0	0	1	1		BT	7890655	C	G	M9003	1	0	1	0	0	1
													BT	13840089	T	C	Z40402	0	2	0	0	0	2	2		CT	14943290	C	T	CTS3460/M5670	0	0	0	2	0	2	2		BT	7904101	G	A	M9005	5	0	0	0	0	5
													BT	13861285	G	A	Z40404	1	0	0	0	0	1	1		CT	15614295	C	T	CTS4364/M5679	0	0	0	1	0	1	1		BT	7907933	G	A	M9006	7	0	0	0	0	7
													BT	18269175	A	G	Z40405	0	0	1	0	0	1	1		CT	15615637	G	C	CTS4368/L1028/M5680	0	2	0	0	0	2	2		BT	7944491	C	A	M9008	4	0	0	0	0	4
													BT	21367668	T	C	Z40407	0	1	0	0	0	1	1		CT	15792531	G	A	CTS4740/M5684	1	0	0	0	0	1	1		BT	8009052	T	C	M9009	0	10	0	0	0	10
													BT	23199069	G	T	Z40409	0	0	0	1	0	1	1		CT	6831340	C	T	CTS543/M5584	0	0	0	4	0	4	4		BT	8021764	G	A	M9010	4	0	0	0	0	4
													C1a2b1b	16958218	G	A	F21252	1	0	0	0	0	1	1		CT	16346371	C	T	CTS5532/M5694	0	0	0	1	0	1	1		BT	8057835	G	A	M9011	1	0	0	0	0	1
													C1a2b1b1	6804540	C	T	BY202474	0	0	0	1	0	1	1		CT	16465771	T	G	CTS5746/M5697	0	0	1	0	0	1	1		BT	8130509	T	C	M9015	0	1	0	0	0	1
													C1b1a1a	23304503	C	T	Y28084	0	0	0	1	0	1	1		CT	16865757	C	G	CTS6383/M5707	0	0	2	0	0	2	2		BT	8165769	G	T	M9016	0	0	0	2	0	2
													C1b1a2a	22178785	G	A	Z32748	1	0	0	0	0	1	1		CT	17114434	C	T	CTS6800/M5713	0	0	0	1	0	1	1		BT	8226191	C	A	M9017	1	0	0	0	0	1
													C1b1a2b	21823552	C	T	AM00794/Z33214	0	0	0	1	0	1	1		CT	17750457	C	T	CTS7933/M5728	0	0	0	2	0	2	2		BT	8330559	T	C	M9019	0	3	0	0	0	3
													C1b1a2b~	21823552	C	T	AM00794/Z33214	0	0	0	1	0	1	1		CT	17751557	A	T	CTS7936/M5729	0	0	0	1	0	1	1		BT	8337827	T	C	M9020	0	4	0	1	1	4
													C1b2a	17762467	G	A	Z23304.2	1	0	0	0	0	1	1		CT	17894575	C	T	CTS8243/M5736	0	0	0	2	0	2	2		BT	8446082	A	T	M9025	0	0	0	5	0	5
													C1b2a	14730345	C	T	Z31953	0	0	0	1	0	1	1		CT	18905190	G	A	CTS9458/M5753	1	0	0	0	0	1	1		BT	8511682	T	C	M9026	0	1	0	0	0	1
													C1b2a~	23251666	C	T	Z32043	0	0	0	1	0	1	1		CT	18961511	G	C	CTS9555/M5757	0	2	0	0	0	2	2		BT	8520679	C	A	M9027	2	0	0	0	0	2
													C1b2a1	8733450	G	A	Y27086	1	0	0	0	0	1	1		CT	19039750	G	C	CTS9722/M5762	0	2	0	0	0	2	2		BT	8540845	A	G	M9028	0	0	3	0	0	3
													C1b2a1c	8733450	G	A	Y27086	1	0	0	0	0	1	1		CT	19059200	C	A	CTS9760/M5763	2	0	0	0	0	2	2		BT	8596285	G	A	M9030	2	0	0	0	0	2
													C1b2a2	13992759	C	T	FT72044	0	0	0	1	0	1	1		CT	6975295	C	G	L1462/M5587	0	0	1	0	0	1	1		BT	8596399	A	G	M9031	0	0	4	0	0	4
													C1b2a2a~	17088266	C	T	FT72316	0	0	0	1	0	1	1		CT	21674378	C	T	L970/PF1065	0	0	0	2	0	2	2		BT	8635293	C	A	M9032	5	0	0	0	0	5
													C2	15285288	G	A	CTS3950	1	0	0	0	0	1	1		CT	23302389	A	G	L977	0	0	1	0	0	1	1		BT	8662142	G	A	M9034	6	0	0	0	0	6
													C2	14036486	G	A	F1678/Z1440	1	0	0	0	0	1	1		CT	14813991	C	T	M168/PF1416	0	0	0	2	0	2	2		BT	8677316	C	G	M9036	0	0	2	0	0	2
													C2	14495251	G	A	P44	1	0	0	0	0	1	1		CT	22744945	C	T	M294	0	0	0	1	0	1	1		BT	8691275	A	G	M9037	0	0	2	0	0	2
													C2a1a1a	9141267	G	A	Z30550	1	0	0	0	0	1	1		CT	2757670	C	T	M5577/PF1413/V189	0	0	0	1	0	1	1		BT	8729512	G	C	M9038	0	6	0	0	0	6
													C2a1a1a	23165402	G	A	Z30593	2	0	0	0	0	2	2		CT	6619341	C	A	M5578	1	0	0	0	0	1	1		BT	8787165	G	A	M9039	4	0	0	0	0	4
													C2a1a3a1c	18236081	G	A	Y136046	1	0	0	0	0	1	1		CT	6991000	C	A	M5588/PF210	3	0	0	0	0	3	3		BT	8869241	G	A	M9041	4	0	0	0	0	4
													C2a1a3a6a	18857781	G	A	Y148127/ZQ394	1	0	0	0	0	1	1		CT	7358315	A	G	M5599/PF234	0	0	2	0	0	2	2		BT	8881498	G	A	M9042	2	0	0	0	0	2
													C2b1	9893879	G	A	F1641	1	0	0	0	0	1	1		CT	7533511	G	A	M5601	3	0	0	0	0	3	3		BT	9106630	A	G	M9046	0	0	1	0	0	1
													C2b1	13812526	G	A	Z12158	1	0	0	0	0	1	1		CT	7646619	G	C	M5605	0	1	0	0	0	1	1		BT	9827891	T	C	M9054	0	1	0	0	0	1
													C2b1a1a1b~	15006089	C	T	CTS3550	0	0	0	1	0	1	1		CT	7707388	T	G	M5606	0	0	2	0	0	2	2		BT	9840307	A	G	M9056	0	0	2	0	0	2
													C2b1a2a2b1c~	9644182	C	T	MF1890	0	0	0	1	0	1	1		CT	7707484	C	A	M5607	3	0	0	0	0	3	3		BT	9842503	T	C	M9057	0	6	0	0	0	6
													C2b1a2a2b1c~	14045718	C	T	MF3730	0	0	0	1	0	1	1		CT	7778691	C	T	M5611/PF263	0	0	0	2	0	2	2		BT	9850716	A	G	M9064	0	0	3	0	0	3
													C2b1b1a	7654384	G	A	K511	1	0	0	0	0	1	1		CT	7796647	C	T	M5613	0	0	0	2	0	2	2		BT	9850725	G	C	M9065	0	1	0	0	0	1
													CF	15203676	A	G	CTS3818/M3690/PF2668	0	0	2	0	0	2	2		CT	8124473	G	T	M5624	0	0	0	1	0	1	1		BT	14013228	T	C	M9075	0	8	0	0	0	8
													CF	16863259	C	G	CTS6376/M3711/PF2697	0	0	2	0	0	2	2		CT	8183439	G	A	M5627	1	0	0	0	0	1	1		BT	14018605	G	A	M9076	2	0	0	0	0	2
													CF	14197867	G	A	P143/PF2587	1	0	0	0	0	1	1		CT	8396636	G	A	M5631/PF292	1	0	0	0	0	1	1		BT	14069414	C	T	M9079	0	0	0	2	0	2
													CT	19261216	C	A	CTS10110/M5767	1	0	0	0	0	1	1		CT	8526565	G	A	M5632	5	0	0	0	0	5	5		BT	14075450	C	T	M9080	0	0	0	3	0	3
													CT	19503081	C	A	CTS10512/M5772	3	0	0	0	0	3	3		CT	8543804	G	A	M5633	3	0	0	0	0	3	3		BT	14096790	C	A	M9081	10	0	0	0	0	10
													CT	7256433	A	T	CTS1181/M5595	0	0	0	2	0	2	2		CT	8635526	C	A	M5636	1	0	0	0	0	1	1		BT	14108214	T	A	M9083	1	0	0	0	0	1
													CT	7275087	C	T	CTS1217/M5597	0	0	0	1	0	1	1		CT	9094343	C	T	M5642	0	0	0	1	0	1	1		BT	14150833	A	G	M9089	0	0	1	0	0	1
													CT	7297487	G	A	CTS1254/M5598	1	0	0	0	0	1	1		CT	14207088	C	A	M5656	3	0	0	0	0	3	3		BT	14344506	C	G	M9094	0	0	8	0	0	8
													CT	14149010	G	A	CTS1996/M5651	1	0	0	0	0	1	1		CT	15940056	C	G	M5686	0	0	1	0	0	1	1		BT	14369403	C	T	M9095	0	0	0	3	0	3
													CT	14172842	T	G	CTS2077/M5653	0	0	2	0	0	2	2		CT	16262390	T	A	M5691/PF779	2	0	0	0	0	2	2		BT	14386666	G	A	M9097	4	0	0	0	0	4
													CT	14943290	C	T	CTS3460/M5670	0	0	0	1	0	1	1		CT	16877090	G	A	M5708	2	0	0	0	0	2	2		BT	14401169	T	C	M9098	0	4	0	0	0	4
													CT	6744622	C	G	CTS423/M5583	0	0	2	0	0	2	2		CT	16887784	G	C	M5709	0	3	0	0	0	3	3		BT	14472914	C	T	M9100	0	0	0	4	0	4
													CT	15614295	C	T	CTS4364/M5679	0	0	0	2	0	2	2		CT	16984364	G	T	M5711/PF821	0	0	0	1	0	1	1		BT	14541174	T	G	M9103	0	0	1	0	0	1
													CT	15615637	G	C	CTS4368/L1028/M5680	0	3	0	0	0	3	3		CT	17104433	A	C	M5712	0	3	0	0	0	3	3		BT	14588372	G	A	M9105	2	0	0	0	0	2
													CT	15792531	G	A	CTS4740/M5684	2	0	0	0	0	2	2		CT	17301733	T	C	M5716/PF840	0	5	0	1	1	5	4		BT	14713690	T	A	M9109	8	0	0	0	0	8
													CT	6831340	C	T	CTS543/M5584	0	0	0	3	0	3	3		CT	17589395	G	A	M5723	1	0	0	0	0	1	1		BT	14720802	G	A	M9110	8	0	0	0	0	8
													CT	16346371	C	T	CTS5532/M5694	0	0	0	2	0	2	2		CT	17909505	G	A	M5738	2	0	0	0	0	2	2		BT	14762104	G	C	M9114	0	4	0	0	0	4
													CT	16465771	T	G	CTS5746/M5697	0	0	2	0	0	2	2		CT	18179043	C	A	M5747	1	0	0	0	0	1	1		BT	14786996	A	T	M9116	0	0	0	3	0	3
													CT	16865757	C	G	CTS6383/M5707	0	0	1	0	0	1	1		CT	18607673	T	A	M5749	1	0	0	0	0	1	1		BT	14839376	T	C	M9117	0	3	0	0	0	3
													CT	17186912	C	T	CTS6907/M5715	0	0	0	1	0	1	1		CT	18940202	A	G	M5754	0	0	1	0	0	1	1		BT	14885368	C	T	M9118/Page81	0	0	0	2	0	2
													CT	17379868	C	T	CTS7257/M5718	0	0	0	1	0	1	1		CT	18974195	C	T	M5760	0	0	0	3	0	3	3		BT	14980170	C	T	M9121	0	0	0	2	0	2
													CT	17894575	C	T	CTS8243/M5736	0	0	0	3	0	3	3		CT	19132472	G	A	M5765	1	0	0	0	0	1	1		BT	15068525	A	T	M9125	0	0	0	5	0	5
													CT	18077583	T	C	CTS8542/M5743	0	2	0	0	0	2	2		CT	19407727	C	G	M5769	0	0	2	0	0	2	2		BT	15095089	C	T	M9126	0	0	0	1	0	1
													CT	18592845	G	A	CTS8980/M5748	1	0	0	0	0	1	1		CT	19481868	C	A	M5771	1	0	0	0	0	1	1		BT	15112480	C	T	M9128	0	0	0	9	0	9
													CT	18905190	G	A	CTS9458/M5753	3	0	0	0	0	3	3		CT	21413635	A	C	M5782/PF1046	0	2	0	1	0	2	2		BT	15256839	A	G	M9133	0	0	3	0	0	3
													CT	19039750	G	C	CTS9722/M5762	0	3	0	0	0	3	3		CT	21429988	A	G	M5783	0	0	1	0	0	1	1		BT	15381787	C	G	M9135	0	0	4	0	0	4
													CT	19059200	C	A	CTS9760/M5763	4	0	0	0	0	4	4		CT	21650381	A	G	M5786/PF1061	0	0	1	0	0	1	1		BT	15382324	C	G	M9136	0	0	6	0	0	6
													CT	19090637	C	G	CTS9828/M5764	0	0	1	0	0	1	1		CT	21683734	C	T	M5788	0	0	0	1	0	1	1		BT	15450357	C	A	M9138	1	0	0	0	0	1
													CT	19167672	G	C	CTS9948	0	1	0	0	0	1	1		CT	22067044	A	T	M5794/PF1092	0	0	0	1	0	1	1		BT	15451147	T	A	M9139	1	0	0	0	0	1
													CT	6975295	C	G	L1462/M5587	0	0	2	0	0	2	2		CT	22136242	C	G	M5796/PF1097	0	0	1	0	0	1	1		BT	15514552	T	C	M9140	0	2	0	0	0	2
													CT	19212465	A	G	L1480/M5766	0	0	1	0	0	1	1		CT	23090404	G	A	M5809/PF1237	1	0	0	0	0	1	1		BT	15542606	A	T	M9141	0	0	0	1	0	1
													CT	22631570	A	G	L1492/Y1569	0	0	3	0	0	3	3		CT	23555082	T	A	M5821	1	0	0	0	0	1	1		BT	15558761	G	T	M9142	0	0	0	3	0	3
													CT	21674378	C	T	L970/PF1065	0	0	0	1	0	1	1		CT	23567930	C	T	M5823	0	0	0	3	0	3	3		BT	15569966	T	C	M9143	0	1	0	0	0	1
													CT	23302389	A	G	L977	0	0	2	0	0	2	2		CT	24443898	C	T	M5825	0	0	0	2	0	2	2		BT	15593938	G	A	M9145	2	0	0	0	0	2
													CT	14813991	C	T	M168/PF1416	0	0	0	1	0	1	1		CT	24470911	C	A	M5826	2	0	0	0	0	2	2		BT	15656524	G	C	M9146	0	2	0	0	0	2
													CT	22744945	C	T	M294	0	0	0	1	0	1	1		CT	22639802	C	T	PF1205	0	0	0	2	0	2	2		BT	15731578	T	C	M9148	0	3	0	0	0	3
													CT	6619341	C	A	M5578	1	0	0	0	0	1	1		CT	28790215	G	C	PF1337	0	4	0	0	0	4	4		BT	15905094	G	T	M9152	0	0	0	6	0	6
													CT	6864267	A	G	M5585/PF1414/V9	0	0	2	0	0	2	2		CT	9158586	G	A	PF328	2	0	0	0	0	2	2		BT	15976805	A	G	M9156	0	0	2	0	0	2
													CT	6991000	C	A	M5588/PF210	2	0	0	0	0	2	2		CT	9758726	G	A	PF342	1	0	0	0	0	1	1		BT	15995289	C	T	M9157	0	0	0	2	0	2
													CT	7210130	G	A	M5593	1	0	0	0	0	1	1		CT	19169483	T	C	PF970	0	4	0	0	0	4	4		BT	16016838	G	A	M9159	1	0	0	0	0	1
													CT	7358315	A	G	M5599/PF234	0	0	2	0	0	2	2		CT	14472971	C	T	Y1526	0	0	0	3	0	3	3		BT	16302343	G	A	M9165	1	0	0	0	0	1
													CT	7416169	T	C	M5600	0	1	0	0	0	1	1		CT	17975155	G	T	Y1537	0	0	0	1	0	1	1		BT	16332337	C	T	M9166	0	0	0	7	0	7
													CT	7533511	G	A	M5601	4	0	0	0	0	4	4		CT	22529475	C	G	Y1567	0	0	1	0	0	1	1		BT	16403627	G	A	M9169	2	0	0	0	0	2
													CT	7597185	G	A	M5603/PF1415/V226	1	0	0	0	0	1	1		CT	23234852	G	A	Y1571	2	0	0	0	0	2	2		BT	16538095	C	T	M9173	0	0	0	6	0	6
													CT	7707388	T	G	M5606	0	0	1	0	0	1	1		CT	9989244	G	T	Z17706	0	0	0	4	0	4	4		BT	16542464	A	C	M9174/S1572	0	4	0	0	0	4
													CT	7707484	C	A	M5607	2	0	0	0	0	2	2		CT	10045515	G	A	Z17707	1	0	0	0	0	1	1		BT	16608008	T	C	M9176	0	1	0	0	0	1
													CT	7782393	C	T	M5612	0	0	0	2	0	2	2		CT	13213798	G	T	Z17710	0	0	0	2	0	2	2		BT	16913677	T	C	M9187	0	2	0	0	0	2
													CT	7796647	C	T	M5613	0	0	0	3	0	3	3		CT	7233061	G	A	Z40571	2	0	0	0	0	2	2		BT	17041558	G	A	M9193	5	0	0	0	0	5
													CT	7887815	A	T	M5615	0	0	0	2	0	2	2		D1a1a1a1a1b	21089620	C	T	F3999	0	0	0	1	0	1	1		BT	17054132	A	G	M9194.3	0	0	1	0	0	1
													CT	8080397	T	A	M5622	2	0	0	0	0	2	2		D1a2a1a2b1a1a1a	9791250	G	A	L137.3	2	0	0	0	0	2	2		BT	17110614	A	G	M9196	0	0	1	0	0	1
													CT	8124473	G	T	M5624	0	0	0	1	0	1	1		D1a2a1a3	8634565	C	T	Z18531	0	0	0	1	0	1	1		BT	17147159	C	T	M9197	0	0	0	1	0	1
													CT	8262951	T	C	M5629	0	1	0	0	0	1	1		D1a2a1b2b1a1a1a	9791250	G	A	L137.3	2	0	0	0	0	2	2		BT	17192307	G	C	M9199	0	4	0	0	0	4
													CT	8396636	G	A	M5631/PF292	4	0	0	0	0	4	4		D1a2a1c1b1	23129469	C	T	Y27949.2	0	0	0	1	0	1	1		BT	17270785	C	A	M9204	1	0	0	0	0	1
													CT	8526565	G	A	M5632	2	0	0	0	0	2	2		D1a2b	18836081	C	T	Y142007	0	0	0	1	0	1	1		BT	17298439	G	A	M9209	6	0	0	0	0	6
													CT	8543804	G	A	M5633	4	0	0	0	0	4	4		E1b1a1~	23554992	C	T	M4938	0	0	0	1	0	1	1		BT	17324151	A	G	M9210	0	0	2	0	0	2
													CT	9094343	C	T	M5642	0	0	0	4	0	4	4		E1b1a1a1a1c2c1a	8366868	C	T	Z16070^	0	0	0	1	0	1	1		BT	17372321	G	A	M9213	2	0	0	0	0	2
													CT	14124435	G	A	M5650	1	0	0	0	0	1	1		E1b1a1a1a2a2a1	18724228	C	T	Z21640	0	0	0	1	0	1	1		BT	17388578	A	G	M9214	0	0	8	0	0	8
													CT	14149520	T	A	M5652	1	0	0	0	0	1	1		E1b1b1a1a1	14595380	G	A	CTS2967	1	0	0	0	0	1	1		BT	17393971	C	T	M9215	0	0	0	1	0	1
													CT	14207088	C	A	M5656	1	0	0	0	0	1	1		E1b1b1a1a2a1b~	8124473	G	T	M5624	0	0	0	1	0	1	1		BT	17504731	G	A	M9218	5	0	0	0	0	5
													CT	16430957	G	A	M5695/PF1417/V41	1	0	0	0	0	1	1		E1b1b1a1b1~	23992777	G	A	PF2252	1	0	0	0	0	1	1		BT	17511829	T	C	M9219	0	6	0	0	0	6
													CT	16542862	A	T	M5698/PF796	0	0	0	1	0	1	1		E1b1b1a1b1a10b2b1~	13841619	G	A	Y16269	1	0	0	0	0	1	1		BT	17620657	C	T	M9221	0	0	0	1	0	1
													CT	16844116	G	A	M5706/PF815	2	0	0	0	0	2	2		E1b1b1a1b2a4b5a~	15019711	G	A	BY6785	1	0	0	0	0	1	1		BT	17623760	G	A	M9223	7	0	0	0	0	7
													CT	16877090	G	A	M5708	1	0	0	0	0	1	1		E1b1b1b2b2a1a1b~	22157629	C	T	M5797.2	0	0	0	1	0	1	1		BT	17670179	C	T	M9226	0	0	0	2	0	2
													CT	16887784	G	C	M5709	0	2	0	0	0	2	2		E2	7648175	C	T	V1331/Z15718	0	0	0	1	0	1	1		BT	17670193	G	A	M9227	2	0	0	0	0	2
													CT	17104433	A	C	M5712	0	3	0	0	0	3	3		E2b	2751973	G	A	CTS132/V1057	1	0	0	0	0	1	1		BT	17674985	G	T	M9228	0	0	0	5	0	5
													CT	17301733	T	C	M5716/PF840	0	3	0	0	0	3	3		E2b	13210722	C	T	Z15819	0	0	0	1	0	1	1		BT	17753892	G	A	M9231	8	0	0	0	0	8
													CT	17515027	G	A	M5721/PF1418/V52	2	0	0	0	0	2	2		E2b1a1d	14192597	G	T	CTS2130	0	0	0	1	0	1	1		BT	17840394	C	T	M9235	0	0	0	3	0	3
													CT	17670046	C	A	M5726	1	0	0	0	0	1	1		F	15095345	A	G	CTS3654/M3689/PF2667	0	0	1	0	0	1	1		BT	17886479	G	A	M9237	2	0	0	0	0	2
													CT	17753650	A	G	M5730	0	0	1	0	0	1	1		F	7671530	G	A	F1046/M3646/PF2610/YSC0001295	1	0	0	0	0	1	1		BT	17909260	G	A	M9239	4	0	0	0	0	4
													CT	17909505	G	A	M5738	2	0	0	0	0	2	2		F	8442341	A	G	F1209/M3654/YSC0001297	0	0	1	0	0	1	1		BT	17940510	C	A	M9240	1	0	0	0	0	1
													CT	18106506	G	A	M5745	2	0	0	0	0	2	2		F	8572150	G	A	F1320/M3657/PF2621	1	0	0	0	0	1	1		BT	17966904	C	A	M9242	4	0	0	0	0	4
													CT	18715075	A	G	M5751/PF937	0	0	3	0	0	3	3		F	14171665	C	T	F1714/M3677/PF2653	0	0	0	1	0	1	1		BT	18053867	T	A	M9244	4	0	0	0	0	4
													CT	18940202	A	G	M5754	0	0	4	0	0	4	4		F	16401339	C	T	F2155/M3704/PF2690	0	0	0	3	0	3	3		BT	18067088	T	A	M9245	6	0	0	0	0	6
													CT	18948988	T	C	M5756/PF951	0	2	0	0	0	2	2		F	18051289	C	G	F2688/M3722/PF2716	0	0	2	0	0	2	2		BT	18069115	G	A	M9246	4	0	0	0	0	4
													CT	18974195	C	T	M5760	0	0	0	2	0	2	2		F	19220444	A	G	F2985/M3736/PF2731	0	0	1	0	0	1	1		BT	18113973	G	A	M9248	2	0	0	0	0	2
													CT	19407727	C	G	M5769	0	0	2	0	0	2	2		F	21147336	T	C	F3136/M3741/PF2737	0	1	0	0	0	1	1		BT	18152393	C	T	M9251	0	0	0	2	0	2
													CT	21250559	C	G	M5775	0	0	2	0	0	2	2		F	22673903	T	G	F3335/M3754/PF2758	0	0	3	0	0	3	3		BT	18162272	G	A	M9252	7	0	0	0	0	7
													CT	21413635	A	C	M5782/PF1046	0	1	0	0	0	1	1		F	8131538	G	T	F3692/M3650	0	0	0	3	0	3	3		BT	18179224	G	A	M9253	1	0	0	0	0	1
													CT	22067044	A	T	M5794/PF1092	0	0	0	1	0	1	1		F	2722506	G	A	F719/IMS-JST00305/M3636/S8235	1	0	0	0	0	1	1		BT	18242832	G	A	M9254	4	0	0	0	0	4
													CT	22136242	C	G	M5796/PF1097	0	0	1	0	0	1	1		F	19205814	A	T	L470/M3735/PF2730	0	0	0	3	0	3	3		BT	18585407	T	G	M9255	0	0	4	0	0	4
													CT	23090404	G	A	M5809/PF1237	1	0	0	0	0	1	1		F	14832620	T	G	M235/Page80/PF2665	0	0	1	0	0	1	1		BT	18589521	G	A	M9257	2	0	0	0	0	2
													CT	23105586	C	A	M5812	1	0	0	0	0	1	1		F	2756471	A	T	M3637/PF2589/V186	0	0	0	2	0	2	2		BT	18628317	G	A	M9260	1	0	0	0	0	1
													CT	23126086	C	T	M5814	0	0	0	1	0	1	1		F	2912385	T	C	M3639/PF2591	0	2	0	0	0	2	2		BT	18633816	C	T	M9261	0	0	0	1	0	1
													CT	23555082	T	A	M5821	1	0	0	0	0	1	1		F	7726849	A	G	M3647/PF2611	0	0	2	0	0	2	2		BT	18643546	T	G	M9262	0	0	2	0	0	2
													CT	23561669	A	T	M5822	0	0	0	1	0	1	1		F	8227605	A	G	M3652/PF2615	0	0	1	0	0	1	1		BT	18814791	G	A	M9263	5	0	0	0	0	5
													CT	23567930	C	T	M5823	0	0	0	1	0	1	1		F	21917313	C	T	M89/PF2746	0	0	0	1	0	1	1		BT	18837871	G	A	M9265	6	0	0	0	0	6
													CT	21095622	C	T	PF1016	0	0	0	1	0	1	1		F	21618856	C	T	P135/PF2741	0	0	0	2	0	2	2		BT	18900525	C	T	M9266	0	0	0	1	0	1
													CT	22639802	C	T	PF1205	0	0	0	1	0	1	1		F	14199284	T	C	P138/PF2655	0	1	0	0	0	1	1		BT	18917853	C	T	M9267	0	0	0	3	0	3
													CT	28790215	G	C	PF1337	0	1	0	0	0	1	1		F	8424089	G	A	P145/PF2617	2	0	0	0	0	2	2		BT	18958429	C	T	M9269	0	0	0	2	0	2
													CT	9158586	G	A	PF328	1	0	0	0	0	1	1		F	8602415	C	T	P146/PF2623	0	0	0	1	0	1	1		BT	19118181	C	G	M9277	0	0	3	0	0	3
													CT	9758726	G	A	PF342	2	0	0	0	0	2	2		F	19349615	C	T	P148/PF2734	0	0	0	1	0	1	1		BT	19140679	C	T	M9278/PF969	0	0	0	4	0	4
													CT	19169483	T	C	PF970	0	1	0	0	0	1	1		F	18578476	G	A	P149/PF2720	1	0	0	0	0	1	1		BT	19149592	C	A	M9280	2	0	0	0	0	2
													CT	14074463	C	T	Y1525	0	0	0	2	0	2	2		F	8680661	T	C	P151/PF2625	0	1	0	0	0	1	1		BT	19207843	C	A	M9282	5	0	0	0	0	5
													CT	14472971	C	T	Y1526	0	0	0	2	0	2	2		F	17493513	C	T	P158/PF2706	0	0	0	4	0	4	4		BT	19218668	C	T	M9283	0	0	0	5	0	5
													CT	16131945	C	G	Y1531	0	0	1	0	0	1	1		F	8474189	A	C	P160/PF2618	0	3	0	0	0	3	3		BT	19233322	T	C	M9284	0	2	0	0	0	2
													CT	17975155	G	T	Y1537	0	0	0	1	0	1	1		F	16242316	A	T	P163/PF2686	0	0	0	2	0	2	2		BT	19235631	C	T	M9285	0	0	0	2	0	2
													CT	23234852	G	A	Y1571	2	0	0	0	0	2	2		F	17256018	C	T	P166/PF2702	0	0	0	1	0	1	1		BT	19249565	C	G	M9286	0	0	2	0	0	2
													CT	23642375	C	T	Y1573	0	0	0	1	0	1	1		F	9108252	G	T	P187/PF2632	0	0	0	2	0	2	2		BT	19306455	A	C	M9288/PF985/V3998	0	5	0	0	0	5
													CT	24358251	T	C	Y1574	0	1	0	0	0	1	1		G2a1a	7627715	C	T	FGC590/Z6533	0	0	0	1	0	1	1		BT	19317082	T	C	M9289	0	1	0	0	0	1
													CT	28789895	A	T	Y1580	0	0	0	1	0	1	1		G2a1a2a2~	6944446	C	T	Z31469	0	0	0	1	0	1	1		BT	19325165	C	T	M9290	0	0	0	1	0	1
													CT	9989244	G	T	Z17706	0	0	0	2	0	2	2		G2a2a1a2a1	13814902	C	T	Z6277	0	0	0	1	0	1	1		BT	19337259	T	C	M9291	0	2	0	0	0	2
													CT	13213798	G	T	Z17710	0	0	0	1	0	1	1		G2a2a1a2a1a1b3~	8009103	G	A	FT115674	1	0	0	0	0	1	1		BT	19391922	T	C	M9292	0	5	0	0	0	5
													CT	7233061	G	A	Z40571	1	0	0	0	0	1	1		G2a2a1a2a2b1~	2865363	C	T	FGC2281/Z12219	0	0	0	1	0	1	1		BT	19445252	A	C	M9295	0	1	0	0	0	1
													D1	14424848	C	T	CTS2682^	0	0	0	1	0	1	1		G2a2a1a2a2b1~	18177589	C	T	FGC2358	0	0	0	1	0	1	1		BT	21069381	G	A	M9300	1	0	0	0	0	1
													D1a1a1	17957933	C	T	Z27324	0	0	0	1	0	1	1		G2a2b1	19087143	C	T	M3372/M461	0	0	0	1	0	1	1		BT	21122071	A	G	M9303	0	0	3	0	0	3
													D1a1a1b~	22147126	C	T	Z41046	0	0	0	1	0	1	1		G2a2b1a1b1a2a~	17216058	G	A	BY113101	1	0	0	0	0	1	1		BT	21247623	G	A	M9310	1	0	0	0	0	1
													D1a2a	8419743	C	T	FGC6289/SK543/V1917/Y11720	0	0	0	1	0	1	1		G2a2b1b1a1a	15424998	C	T	Z30803	0	0	0	1	0	1	1		BT	21259569	C	T	M9311	0	0	0	4	0	4
													D2	21250107	G	A	BY205365	2	0	0	0	0	2	2		G2a2b1b1a1b1c1~	21870593	C	T	BY136063	0	0	0	1	0	1	1		BT	21268114	C	G	M9312	0	0	4	0	0	4
													E1a1	22960452	C	T	Z17499	0	0	0	1	0	1	1		G2a2b2a1a1a1a1~	13798648	C	T	Z2006	0	0	0	1	0	1	1		BT	21289152	T	G	M9315	0	0	7	0	0	7
													E1a1a1b2~	15708383	G	A	Z38883	1	0	0	0	0	1	1		G2a2b2a1a1a1a1a1a1a7~	22929047	G	A	SK1141/Z6932	1	0	0	0	0	1	1		BT	21292327	C	T	M9316	0	0	0	5	0	5
													E1a2b1a1a1	9950036	G	A	Z14919	1	0	0	0	0	1	1		G2a2b2a1a1a1a1a1a2b~	24405121	C	T	FT55156	0	0	0	1	0	1	1		BT	21311141	C	T	M9317	0	0	0	3	0	3
													E1a2b1c~	8567995	G	A	PF3664.2/V2273.2/Z2638.2	3	0	0	0	0	3	3		G2a2b2a1a1b1a1a1a1a4~	17833928	C	T	AM00719.2/F2610.2	0	0	0	1	0	1	1		BT	21321168	G	A	M9318	1	0	0	0	0	1
													E1a2c~	8567995	G	A	Z36222	3	0	0	0	0	3	3		G2a2b2a1a1b1b1b~	8032292	G	A	Z40477	1	0	0	0	0	1	1		BT	21326695	A	G	M9319	0	0	3	0	0	3
													E1b1a1~	14938281	G	A	CTS3450/M4802	1	0	0	0	0	1	1		G2a2b2a1a1c1a1a4	8393828	G	A	FGC63512/FGC63513/Z44106	1	0	0	0	0	1	1		BT	21391240	G	A	M9321	5	0	0	0	0	5
													E1b1a1~	8584830	G	A	M4759/Z1115	1	0	0	0	0	1	1		G2a2b2a4	14859946	G	A	Z30510	1	0	0	0	0	1	1		BT	21470547	T	G	M9322	0	0	4	0	0	4
													E1b1a1a1	22684420	C	T	CTS10659	0	0	0	1	0	1	1		GHIJK	14237670	C	T	CTS2254/M3680/PF2657	0	0	0	1	0	1	1		BT	21486590	T	C	M9325	0	1	0	0	0	1
													E1b1a1a1a1c1a1a3a1d1b1b1a5~	7890722	G	A	Z37663	1	0	0	0	0	1	1		H	17800761	T	C	M2936/Z4273	0	1	0	0	0	1	1		BT	21490191	A	G	M9326	0	0	1	0	0	1
													E1b1a1a1a1c1a1a3c2	16753850	G	A	Z5966	1	0	0	0	0	1	1		H	17887908	A	G	M2942/Z4276	0	0	1	0	0	1	1		BT	21492793	T	A	M9327	4	0	0	0	0	4
													E1b1a1a1a1c1a1a3m1~	8419186	G	A	SK648/Z22633	1	0	0	0	0	1	1		H	17941203	G	A	M2945/Z4278	3	0	0	0	0	3	3		BT	21567686	C	G	M9331	0	0	2	0	0	2
													E1b1a1a1a1c1a1b1a~	7245511	C	T	CTS1161/M4309	0	0	0	1	0	1	1		H	18182848	G	T	M2955/Z4282	0	0	0	1	0	1	1		BT	21627877	C	T	M9334	0	0	0	3	0	3
													E1b1a1a1a1c2a1	21982283	C	T	Z15995	0	0	0	1	0	1	1		H	19535440	A	T	M2992/Z4307	0	0	0	1	0	1	1		BT	21637759	A	G	M9335	0	0	4	0	0	4
													E1b1a1a1a2a1a3b3	21331875	C	T	Z21817^	0	0	0	1	0	1	1		H	22951796	G	A	M3058/Z4338	1	0	0	0	0	1	1		BT	21646196	G	A	M9336/Page26	4	0	0	0	0	4
													E1b1a1b1c	9145613	G	A	Z22199	1	0	0	0	0	1	1		H	23033176	G	A	M3062/Z4340	1	0	0	0	0	1	1		BT	21698424	G	C	M9340	0	1	0	0	0	1
													E1b1a2b1~	23251666	C	T	Z32043	0	0	0	1	0	1	1		H	23153863	T	A	M3070/Z4346	2	0	0	0	0	2	2		BT	21815245	G	A	M9341	1	0	0	0	0	1
													E1b1b1~	17535140	G	A	CTS7554/M5233/PF1728	1	0	0	0	0	1	1		H~	16919982	C	T	M2896/Z4251	0	0	0	1	0	1	1		BT	22025458	C	T	M9346	0	0	0	2	0	2
													E1b1b1~	9910515	G	A	FGC2099/Y2533	1	0	0	0	0	1	1		H1a1a4b2c1a	21194671	G	A	Z14439	1	0	0	0	0	1	1		BT	22062727	C	T	M9347	0	0	0	2	0	2
													E1b1b1a1a1	21268147	C	T	FGC2154/Y6744	0	0	0	1	0	1	1		H1a2a	16003893	G	A	Z14076	2	0	1	0	1	2	1		BT	22079278	A	T	M9348	0	0	0	5	0	5
													E1b1b1a1a1d~	13808155	C	T	BY8256	0	0	0	1	0	1	1		H1a2b1b2~	2737415	G	A	Z34847	1	0	0	0	0	1	1		BT	22143034	C	T	M9349	0	0	0	1	0	1
													E1b1b1a1a2a1b~	8124473	G	T	M5624	0	0	0	1	0	1	1		H2	6932824	G	T	L279	0	0	0	4	0	4	4		BT	22180636	C	A	M9352	5	0	0	0	0	5
													E1b1b1a1b1a6a1d~	17195871	C	T	BY4355/Y23082	0	0	0	1	0	1	1		H2	8353840	T	G	L281	0	0	1	0	0	1	1		BT	22625732	C	T	M9356	0	0	0	1	0	1
													E1b1b1a1b2a4c1~	14716655	G	A	Y17636	1	0	0	0	0	1	1		H2	14869743	C	A	P96	2	0	0	0	0	2	2		BT	22719912	G	A	M9357	1	0	0	0	0	1
													E1b1b1b1~	15512696	G	A	CTS4247/M5029/PF2354/V3001	1	0	0	0	0	1	1		H2	21872301	G	C	SK1178/Z18984	0	3	0	0	0	3	3		BT	22727889	C	T	M9359	0	0	0	4	0	4
													E1b1b1b1a1~	15978952	C	T	CTS5039/M5177/PF2516	0	0	0	1	0	1	1		H2	21724057	G	A	SK1183/Z18981	1	0	0	0	0	1	1		BT	22730555	A	G	M9360	0	0	4	0	0	4
													E1b1b1b1a1e1c~	14151927	C	T	PF6795	0	0	0	1	0	1	1		H2	17800614	A	C	SK1184/Z18930	0	2	0	1	0	2	2		BT	22730777	T	C	M9361	0	1	0	0	0	1
													E1b1b1b1b	8871301	G	A	PF2431	1	0	0	0	0	1	1		H2	14328924	G	A	Z18854	1	0	0	0	0	1	1		BT	22817840	G	C	M9365	0	2	0	0	0	2
													E1b1b1b2a1a1a1a1b1~	22737591	C	T	Y16624	0	0	0	1	0	1	1		H2	15545891	A	C	Z18878	0	1	0	0	0	1	1		BT	22866729	G	A	M9366	5	0	0	0	0	5
													E1b1b1b2b3a~	21933779	G	A	Y17587	1	0	0	0	0	1	1		H2	15906801	G	A	Z18885	1	0	0	0	0	1	1		BT	22879049	T	C	M9367	0	2	0	0	0	2
													E1b1b1b2b3b~	7877190	G	A	Y19225	1	0	0	0	0	1	1		H2	16448046	A	G	Z18895	0	0	1	0	0	1	1		BT	22931502	C	T	M9370	0	0	0	3	0	3
													E2b	8875427	C	T	Z15807	0	0	0	1	0	1	1		H2	17917069	C	T	Z18935	0	0	0	1	0	1	1		BT	23005081	G	T	M9372	0	0	0	5	0	5
													E2b1a1~	18396709	C	T	Z20863	0	0	0	1	0	1	1		H2	18574865	C	G	Z18941	0	0	1	0	0	1	1		BT	23010471	C	T	M9373	0	0	0	7	0	7
													F	15323154	A	G	CTS3996/M3692/PF2671	0	0	3	0	0	3	3		H2	22631194	G	A	Z18999	1	0	0	0	0	1	1		BT	23070865	A	C	M9376	0	3	0	0	0	3
													F	8442341	A	G	F1209/M3654/YSC0001297	0	0	2	0	0	2	2		H2	23186865	A	T	Z19013	0	0	0	3	0	3	3		BT	23113295	T	C	M9378	0	8	0	0	0	8
													F	8572150	G	A	F1320/M3657/PF2621	7	0	0	0	0	7	7		H2	23187073	G	A	Z19014	1	0	0	0	0	1	1		BT	23244049	G	C	M9379	0	6	0	0	0	6
													F	8589031	C	T	F1329/M3658/PF2622/YSC0001299	0	0	0	1	0	1	1		H2	23193728	G	A	Z19015	1	0	0	0	0	1	1		BT	23256074	A	G	M9380	1	0	5	0	1	5
													F	14171665	C	T	F1714/M3677/PF2653	0	0	0	1	0	1	1		H2~	8441583	A	G	SK1189	0	0	2	0	0	2	2		BT	23405276	T	C	M9389	0	6	0	0	0	6
													F	14294504	T	G	F1753/M3681/PF2658	0	0	3	0	0	3	3		H2~	7921036	A	G	Y21594	0	0	1	0	0	1	1		BT	23558260	G	A	M9393	3	0	0	0	0	3
													F	14334396	G	T	F1767/M3683/PF2660	0	0	0	1	0	1	1		H2~	8521719	C	G	Y21662	0	0	2	0	0	2	2		BT	23565114	T	A	M9394	2	0	0	0	0	2
													F	16401339	C	T	F2155/M3704/PF2690	0	0	0	1	0	1	1		H2a1~	14160776	C	T	Z18847	0	0	0	1	0	1	1		BT	23757465	G	C	M9397	0	8	0	0	0	8
													F	18765649	T	C	F2837/M3726/PF2722	0	1	0	0	0	1	1		H2a1~	15397583	T	G	Z18874	0	0	1	0	0	1	1		BT	21938158	C	A	M94	1	0	0	0	0	1
													F	8131538	G	T	F3692/M3650	0	0	0	7	0	7	7		H2a1~	21335297	G	A	Z18971	1	0	0	0	0	1	1		BT	23991003	G	A	M9405	3	0	0	0	0	3
													F	2722506	G	A	F719/IMS-JST00305/M3636/S8235	2	0	0	0	0	2	2		H2a1~	21680010	G	A	Z18979	1	0	0	0	0	1	1		BT	24377975	G	T	M9406	0	0	0	6	0	6
													F	19205814	A	T	L470/M3735/PF2730	0	0	0	3	0	3	3		H2a1~	22051923	T	G	Z18988	0	0	2	0	0	2	2		BT	28531368	C	A	M9410	1	0	0	0	0	1
													F	21811276	C	T	L882/M3749/PF2745	0	0	0	1	0	1	1		H2a1~	23197885	G	A	Z19016	3	0	0	0	0	3	3		BT	22129214	T	C	PF1096	0	3	0	0	0	3
													F	2756471	A	T	M3637/PF2589/V186	0	0	0	3	0	3	3		H3a2b	6766724	C	T	Z12831	0	0	0	1	0	1	1		BT	2756519	T	C	PF1403/V187	0	3	0	0	0	3
													F	7726849	A	G	M3647/PF2611	0	0	2	0	0	2	2		H3b	15804015	C	T	Z13915	0	0	0	1	0	1	1		BT	6908261	A	G	PF1408	2	0	4	0	2	4
													F	17398598	C	T	P14/PF2704	0	0	0	2	0	2	2		HIJK	7202703	C	T	F929/M578/PF3494/S6378	0	0	0	3	0	3	3		BT	17037979	C	T	PF1411/V59	0	0	0	6	0	6
													F	6941218	G	A	P141/PF2602	3	0	0	0	0	3	3		I1a1b1a4a1a1b1a4b3~	16576735	G	A	Y20304	1	0	0	0	0	1	1		BT	15219209	T	A	PF713	4	0	0	0	0	4
													F	8424089	G	A	P145/PF2617	4	0	0	0	0	4	4		I1a1b1a4a1c2a2~	9149674	G	A	Y32157	1	0	0	0	0	1	1		BT	2657176	T	C	SRY10831.1	0	3	0	0	0	3
													F	8602415	C	T	P146/PF2623	0	0	0	1	0	1	1		I1a1b1a4a2d1~	6951858	C	T	Y30375	0	0	0	1	0	1	1		BT	28772048	C	T	Y10888	0	0	0	3	0	3
													F	17493513	C	T	P158/PF2706	0	0	0	7	0	7	7		I1a2a1a1a2b2b~	19067182	G	A	A1361	1	0	0	0	0	1	1		BT	7126782	G	A	Y8310	4	0	0	0	0	4
													F	8474189	A	C	P160/PF2618	0	4	0	0	0	4	4		I1a2a1a1c1b~	14983972	C	T	A6180	0	0	0	1	0	1	1		BT	9381562	G	A	Y8311	2	0	0	0	0	2
													F	17256018	C	T	P166/PF2702	0	0	0	3	0	3	3		I2a1b1a1a1a	9791250	G	A	L137.1/S166.1	2	0	0	0	0	2	2		BT	9787710	T	A	Y8314	2	0	0	0	0	2
													F	9108252	G	T	P187/PF2632	0	0	0	1	0	1	1		I2a1b1a1a1b1a~	14396927	T	G	Y6024	0	0	1	0	0	1	1		BT	13841677	A	G	Y8316	0	0	5	0	0	5
													F	16839641	A	T	P316/PF2696	0	0	0	1	0	1	1		I2a1b1a1b1a1a1a1~	13836602	G	A	Y5313	1	0	0	0	0	1	1		BT	18005126	T	A	Y8319	2	0	0	0	0	2
													F	15234830	A	T	PF2669	0	0	0	2	0	2	2		I2a1b1a2a2a1~	8286109	C	T	Y8547	0	0	0	1	0	1	1		BT	18262817	G	A	Y8320	3	0	0	0	0	3
													G1a1a1a1e2	17139753	C	T	FT107948	0	0	0	1	0	1	1		I2a1b1a2b1a2b3a1~	19358237	C	T	Y30326	0	0	0	1	0	1	1		BT	20817229	G	A	Y8322	1	0	0	0	0	1
													G1a1a2a1c~	7150175	G	A	FT8413	1	0	0	0	0	1	1		I2a2	14197631	G	A	L596/PF6907/S292	1	0	0	0	0	1	1		BT	21046360	G	T	Y8323	0	0	0	2	0	2
													G1a1a2b2a2	22178791	G	A	BY138193	1	0	0	0	0	1	1		I2b	22528416	C	T	BY50115	0	0	0	1	0	1	1		BT	23190598	A	T	Y8325	0	0	0	5	0	5
													G2a1a3a~	23118329	C	T	Z35440	0	0	0	1	0	1	1		J1a	16227302	G	A	CTS5368/Z2215	1	0	0	0	0	1	1		BT	13826087	G	A	Y8488	7	0	0	0	0	7
													G2a2a1a1b1	22707202	C	T	FGC6700/Y14974	0	0	0	1	0	1	1		J1a2a~	7877119	G	A	L826/YSC0000073	1	0	0	0	0	1	1		BT	16682167	G	C	Y8489	0	1	0	0	0	1
													G2a2a1a2a1a1a1b~	19184778	C	T	BY197620	0	0	0	1	0	1	1		J1a2a1a2d2b2b1~	15269464	C	T	YP4763/ZS2524	0	0	0	1	0	1	1		BT	18016799	T	A	Y9422	4	0	0	0	0	4
													G2a2a2a3~	7054557	C	T	BY202517	0	0	0	1	0	1	1		J1a2a1a2d2b2b2c2a~	17205362	G	A	S19350	1	0	0	0	0	1	1		BT	23237493	T	A	Z12129	3	0	0	0	0	3
													G2a2b1	15688381	G	A	M3310/PF3299	1	0	0	0	0	1	1		J1a2a1a2d2b2b2c2c1a1~	14308607	G	A	FGC17483/ZS2385	1	0	0	0	0	1	1		BT	7021041	G	T	Z17365	0	0	0	2	0	2
													G2a2b1a2a1	7074221	G	A	M3240	1	0	0	0	0	1	1		J1a2a1a2d2b2b2c3b~	14503378	C	T	FGC4757/Y10739	0	0	0	1	0	1	1		BT	7032507	C	T	Z17366	0	0	0	3	0	3
													G2a2b1b1a1b1a	17194549	G	A	BY112950	1	0	0	0	0	1	1		J1a2b2b2~	14207127	C	T	ZS10773	0	0	0	1	0	1	1		BT	13806787	G	A	Z17371	6	0	0	0	0	6
													G2a2b1b1a1c1a~	7540096	C	T	BY65046/Z46339	0	0	0	1	0	1	1		J2a1a1a2b2a3b1b3b2a1b2b~	17715542	C	T	Y42163	0	0	0	1	0	1	1		BT	19565341	C	T	Z17373	0	0	0	2	0	2
													G2a2b2a1a1a1a1a1a1a1a1a6~	7340280	C	T	BY202564	0	0	0	1	0	1	1		J2a1a2a1~	19445242	C	T	Y33279	0	0	0	1	0	1	1		BT	22521638	C	T	Z17385	0	0	0	3	0	3
													G2a2b2a1a1b1a1a1a1a2a~	22929288	C	T	BY55405	0	0	0	1	0	1	1		J2a1a2b2a1~	7877119	G	A	L826/YSC0000073	1	0	0	0	0	1	1		BT	24506339	A	G	Z17388	0	0	1	0	0	1
													G2a2b2a1a1b1a1a1a1b1b	18049717	C	T	Y128738	0	0	0	1	0	1	1		J2a1a2b2a2a~	6793916	C	T	Z27792	0	0	0	1	0	1	1		BT	28746408	G	C	Z17390	0	2	0	0	0	2
													G2a2b2a1a1b1a1a1a1c3c	13655424	G	A	FGC63953	1	0	0	0	0	1	1		J2b2a1a1a1a1a1a1f1~	7166706	G	A	Y12413	1	0	0	0	0	1	1		BT	10033862	G	A	Z40374	3	0	0	0	0	3
													G2a2b2a1a1b1a1a2a1a1b1d2	9777414	C	T	FT47697	0	0	0	1	0	1	1		L1a1	13667920	C	T	Z20379	0	0	0	1	0	1	1		BT	10057648	A	G	Z40375	0	0	3	0	0	3
													G2a2b2a1a1b1a1a2a7~	8614265	C	T	Z31323	0	0	0	1	0	1	1		L1a2	16900247	A	G	M5710	0	0	1	0	0	1	1		BT	13477897	C	T	Z40377	0	0	0	2	0	2
													G2a2b2a1a1b1a1a2c	21758015	G	A	BY135232	1	0	0	0	0	1	1		LT [K1]~	18729563	G	A	CTS9177/M2585/PF5561	1	0	0	0	0	1	1		BT	13592206	C	A	Z40378	1	0	0	0	0	1
													G2a2b2a1a1b1a2b~	7017280	C	T	Z6151	0	0	0	1	0	1	1		N	22571221	C	T	M2279/S24429/Z5023	0	0	0	1	0	1	1		BT	13665248	G	A	Z40379	8	0	0	0	0	8
													G2a2b2a1a1c2b1a2c1a	8258293	C	T	A20424.2	0	1	0	2	1	2	1		N1a1a1a1a	14780417	A	G	CTS3266/M2034/Z1956	0	0	1	0	0	1	1		BT	13668726	T	C	Z40380	0	10	0	0	0	10
													G2a2b2b1a1a1c1~	17321714	C	T	PF3468	0	0	0	1	0	1	1		N1a1a1a1a1a1a1a4e1~	17030908	C	T	Y16848	0	0	0	1	0	1	1		BT	13821858	C	G	Z40381	0	0	4	0	0	4
													G2a2b2b1b	21255545	C	T	FGC52648	0	0	0	1	0	1	1		N1a1a1a1a1a6~	14197631	G	A	L596/PF6907	1	0	0	0	0	1	1		BT	13862470	G	A	Z40382	10	0	0	0	0	10
													G2b1	22174429	G	A	BY1821/Y12928	1	0	0	0	0	1	1		N1a1a1a1a2a1a1b~	17553656	C	T	Y21701	0	0	0	1	0	1	1		BT	28787653	G	C	Z40384	0	7	0	0	0	7
													GHIJK	8589031	C	T	F1329/M3658/PF2622/YSC0001299	0	0	0	1	0	1	1		N1a1a3~	16253494	C	T	F7088/FGC4649/YP4507	0	0	0	1	0	1	1		BT	7563503	G	A	Z40386	2	0	0	0	0	2
													H	6855809	G	A	M2713/Z4171	1	0	0	0	0	1	1		N2~	19107273	C	T	FGC28486/Y6561	0	0	0	1	0	1	1		BT	8042040	G	A	Z40387	3	0	0	0	0	3
													H (Notes)	6739738	A	T	P266	0	0	0	1	0	1	1		N2~	8086780	G	A	Y6530	1	0	0	0	0	1	1		BT	8594070	G	A	Z40389	5	0	0	0	0	5
													H1a1a4b1b~	8405105	C	T	Z34641	0	0	0	1	0	1	1		O	18233782	G	A	F478/M1764	1	0	0	0	0	1	1		BT	9150283	G	A	Z40390	5	0	0	0	0	5
													H1a1a4b4a	23064545	C	T	Z4691	0	0	0	1	0	1	1		O1b2a	15409812	G	A	F1942/Page92	1	0	0	0	0	1	1		BT	9850729	G	C	Z40391	0	1	0	0	0	1
													H1a2a	2893225	C	T	Z13968	0	0	0	1	0	1	1		O2a1b1a1a1a1a1a1b1f	18552726	C	T	F2770	0	0	0	1	0	1	1		BT	15261255	C	T	Z40392	0	0	0	2	0	2
													H3a2b	22865289	G	A	Z12959	1	0	0	0	0	1	1		O2a1b1a1a1a1b1a1e	17202099	G	A	MF7768	1	0	0	0	0	1	1		BT	21248962	G	A	Z40394	4	0	0	0	0	4
													HIJK	7202703	C	T	F929/M578/PF3494/S6378	0	0	0	4	0	4	4		O2a1b1a2a1a1a1a	17286457	G	A	MF1150	1	0	0	0	0	1	1		BT	21541028	C	T	Z40396	0	0	0	1	0	1
													I	23401471	C	T	CTS11979/PF3878	0	0	0	1	0	1	1		O2a2a1a2a2	17629415	G	A	Y27934	1	0	0	0	0	1	1		BT	7389079	T	C	Z40397	0	1	0	0	0	1
													I	7321418	C	T	CTS1301/PF3635	0	0	0	1	0	1	1		O2a2b1a1a1a1a1b1a1b1	23160178	C	T	A9511.2	0	0	0	1	0	1	1		BT	13202478	G	A	Z40398	2	0	0	0	0	2
													I	14073053	G	A	CTS1800/PF3699	4	0	0	0	0	4	4		O2a2b1a2a1a1b1b2b1	6963027	G	A	SK1770	1	0	0	0	0	1	1		BT	13596520	T	A	Z40400	3	0	0	0	0	3
													I	14214481	G	T	CTS2193/PF3703	0	0	0	1	0	1	1		O2b1a1a2	15767026	G	A	FGC62833	1	0	0	0	0	1	1		BT	13823056	T	A	Z40401	8	0	0	0	0	8
													I	14337364	T	C	CTS2514/PF3706	0	2	0	0	0	2	2		P1~ or K2b2a~	21889767	G	A	M74/N12/PF5963	1	0	0	0	0	1	1		BT	13840089	T	C	Z40402	0	5	0	0	0	5
													I	14352669	G	A	CTS2536/PF3707	1	0	0	0	0	1	1		Q1b1a1a1e1a1~	14315959	C	T	CTS2462	0	0	0	1	0	1	1		BT	13842981	G	A	Z40403	4	0	0	0	0	4
													I	15536870	C	T	CTS4273/PF3729	0	0	0	1	0	1	1		Q1b1a1a1i1a1	17287969	C	T	Z19329	0	0	0	1	0	1	1		BT	18269175	A	G	Z40405	0	0	6	0	0	6
													I	2688442	T	A	CTS48/PF3569	1	0	0	0	0	1	1		Q2a1a3a1a~	16365996	C	T	BZ3065	0	0	0	1	0	1	1		BT	21367668	T	C	Z40407	0	2	0	0	0	2
													I	15862842	C	T	CTS4848/FI7/PF3736/V3186	0	0	0	1	0	1	1		Q2a1c1b1a	16253494	C	T	F7088/FGC4649/YP4507	0	0	0	1	0	1	1		BT	22521712	C	A	Z40408	1	0	0	0	0	1
													I	16415916	A	G	CTS5650/PF3744	0	0	2	0	0	2	2		R (Notes)	10008791	T	C	L150.2/PF6274.2/S351.2	0	2	0	0	0	2	2		BT	23199069	G	T	Z40409	0	0	0	6	0	6
													I	16567253	A	G	CTS5946/PF3748	0	0	1	0	0	1	1		R1a1	2657176	T	C	SRY10831.2	0	2	0	0	0	2	2		BT	23201899	A	C	Z40411	0	1	0	0	0	1
													I	16751000	C	T	CTS6231/PF3750	0	0	0	2	0	2	2		R1a1a1b1a2b3a3a1a1a~	14712935	G	A	YP4849	1	0	0	0	0	1	1		BT	23240528	C	G	Z40412	0	0	2	0	0	2
													I	6926038	T	A	CTS646/PF3629	2	0	0	0	0	2	2		R1a1a1b1a3a1~	19078579	G	A	CTS9808/S3449	1	0	0	0	0	1	1		C1a2b	22752247	C	T	Z44517	0	0	0	1	0	1
													I	16939794	A	T	CTS6497/PF3756	0	0	0	1	0	1	1		R1a1a1b2a2a3b~	21647269	C	T	FGC31687/YP1460	0	0	0	1	0	1	1		C1b1a1b	15436063	G	A	Z16621	1	0	0	0	0	1
													I	17424807	C	T	CTS7329	0	0	0	1	0	1	1		R1a1a1b2a2b1d1~	7089128	G	A	YP5937	1	0	0	0	0	1	1		C1b1a2a	17191637	C	T	Z32633	0	0	0	1	0	1
													I	17497181	C	A	CTS7469	2	0	0	0	0	2	2		R1a2b~	22565846	C	T	YP4215	0	0	0	1	0	1	1		C1b1a2a	21212660	C	T	Z32713	0	0	0	1	0	1
													I	17511797	A	G	CTS7502/PF3760	0	0	2	0	0	2	2		R1b1	8214827	C	T	PF6249	0	0	0	1	0	1	1		C1b1a2b	16854044	C	T	AM00675/F2298	0	0	0	1	0	1
													I	17692855	T	A	CTS7831/PF3766	4	0	0	0	0	4	4		R1b1a	17400785	G	A	L388/PF6468	1	0	0	0	0	1	1		C1b1a2b1a2a~	8695541	C	T	Z32185	0	0	0	1	0	1
													I	18018313	C	A	CTS8420/PF3773	2	0	0	0	0	2	2		R1b1a1b1a1a1c2b2a1b5	14141095	G	A	S15510	1	0	0	0	0	1	1		C1b2	15436063	G	A	Z16621	1	0	0	0	0	1
													I	18172947	A	G	CTS8742/PF3776	0	0	1	0	0	1	1		R1b1a1b1a1a2b1a1a~	23280319	G	A	CTS11795.2	1	0	0	0	0	1	1		C1b2a1c	16518148	A	G	Y25230	0	0	4	0	0	4
													I	18257568	G	A	CTS8876/PF3778	1	0	0	0	0	1	1		R1b1a1b1a1a2c1a1f~	7528669	G	A	BY144/FGC17829/S27834	1	0	0	0	0	1	1		C2a1a1b1a2b~	7062834	C	T	FT18932	0	0	0	1	0	1
													I	18582617	C	T	CTS8963	0	0	0	2	0	2	2		R1b1a1b1a1a2c1a2a3a	14108207	C	T	Z16855	0	0	0	1	0	1	1		C2a1a1b1a2b~	16723271	C	T	FT59	0	1	0	2	1	2
													I	18786174	G	A	CTS9264/PF3782/V3496	1	0	0	0	0	1	1		R1b1a1b1a1a2c1a5a2a1a1	9376352	G	A	S309	1	0	0	0	0	1	1		C2a1a3	16375727	G	A	F3779	3	0	0	0	0	3
													I	18992894	T	C	CTS9618/PF3786/V3671	0	1	0	0	0	1	1		R1b1a1b1a1a2c1a5b1a1c1	6708558	G	A	S6191	1	0	0	0	0	1	1		C2a1a4	17560176	T	C	F12267/Y11997/Z30622	0	3	0	0	0	3
													I	21689728	A	G	FGC2412/Y1909	0	0	1	0	0	1	1		R2a2a1	17137201	G	A	FGC13217	1	0	0	0	0	1	1		C2b1	23301174	C	T	CTS11833	0	0	0	1	0	1
													I	8262092	C	T	FGC2413/Y1869	0	0	0	1	0	1	1		S1d	14664988	C	T	Z42016	0	1	0	2	1	2	1		C2b1a1a1b~	15006089	C	T	CTS3550	0	0	0	1	0	1
													I	7642823	G	T	FGC2416/S10441/V1318/Y1865	0	0	0	5	0	5	5		S4~	18052819	G	A	Y101104	1	0	0	0	0	1	1		C2b1a2a	8571457	C	T	F1319	0	1	0	2	1	2
													I	8382265	C	G	FI2/YSC0000281	0	0	2	0	0	2	2															C2b1a2a2b1a2a~	7020398	G	A	Z46021	3	0	0	0	0	3
													I	8485677	C	A	FI3/L756/PF3662/YSC0000284	1	0	0	0	0	1	1															C2b1a2a2b1a2a1~	21193464	G	T	Y141202	0	0	0	4	0	4
													I	14974451	C	T	L1197/PF3718/V2731/YSC0000260	0	0	0	1	0	1	1															CF	15203676	A	G	CTS3818/M3690/PF2668	1	0	2	0	1	2
													I	21359407	C	G	L503	0	0	1	0	0	1	1															CF	16863259	C	G	CTS6376/M3711/PF2697	0	0	7	0	0	7
													I	8267857	G	A	L578/PF3653	2	0	0	0	0	2	2															CF	14197867	G	A	P143/PF2587	4	0	0	0	0	4
													I	18394743	A	G	L751/PF3779/YSC0000291	0	0	1	0	0	1	1															CT	19261216	C	A	CTS10110/M5767	1	0	0	0	0	1
													I	8536868	C	G	L758/PF3663/V2199/YSC0000285	1	0	3	0	0	3	3															CT	19421388	G	A	CTS10362/M5770	1	0	0	0	0	1
													I	15615533	C	A	L772/PF3731/YSC0000263	1	0	0	0	0	1	1															CT	19503081	C	A	CTS10512/M5772	8	0	0	0	0	8
													I	23154034	C	T	L847/PF3841/YSC0000298	0	0	0	1	0	1	1															CT	2733618	C	A	CTS109/M8948	2	0	0	0	0	2
													I	7244075	A	G	M11064/PF3634	0	0	1	0	0	1	1															CT	22850240	A	G	CTS10946/M5804	0	0	4	0	0	4
													I	6662712	C	T	PF3627.2/V218.2	0	0	0	7	0	7	7															CT	7256433	A	T	CTS1181/M5595	0	0	0	2	0	2
													I	7681156	T	A	PF3640	3	0	0	0	0	3	3															CT	23407446	T	G	CTS11991/M5818	1	0	4	0	0	4
													I	7688470	T	C	PF3641/V1369	0	1	0	0	0	1	1															CT	7275087	C	T	CTS1217/M5597	0	0	0	2	0	2
													I	7853028	C	A	PF3645/V1476	1	0	0	0	0	1	1															CT	2744386	G	T	CTS125/M5576	0	0	0	4	0	4
													I	8466652	G	A	PF3660/V2048	1	0	0	0	0	1	1															CT	14149010	G	A	CTS1996/M5651	7	0	0	0	0	7
													I	8728974	T	G	PF3666	0	0	1	0	0	1	1															CT	14172842	T	G	CTS2077/M5653	0	0	6	0	0	6
													I	16354708	G	A	PF3742/U179	1	0	0	0	0	1	1															CT	14671991	C	A	CTS3120/M5664	6	0	0	0	0	6
													I	21402723	A	G	PF3800	0	0	1	0	0	1	1															CT	14917660	C	G	CTS3431/M5669	0	0	1	0	0	1
													I	21452125	A	G	PF3803	0	0	3	0	0	3	3															CT	14943290	C	T	CTS3460/M5670	0	0	0	5	0	5
													I	21525069	G	A	PF3806	2	0	0	0	0	2	2															CT	6744622	C	G	CTS423/M5583	0	0	3	0	0	3
													I	21841289	G	T	PF3815	0	0	0	2	0	2	2															CT	15614295	C	T	CTS4364/M5679	0	0	0	5	0	5
													I	21939618	G	A	PF3817	1	0	0	0	0	1	1															CT	15615637	G	C	CTS4368/L1028/M5680	0	6	0	1	0	6
													I	22200336	G	A	PF3822	1	0	0	0	0	1	1															CT	15792531	G	A	CTS4740/M5684	2	0	0	0	0	2
													I	21130059	A	G	PH3797	0	0	2	0	0	2	2															CT	16203547	G	T	CTS5318/M5690	0	0	0	1	0	1
													I	13804066	G	C	Z16985	0	1	0	0	0	1	1															CT	6831340	C	T	CTS543/M5584	0	0	0	4	0	4
													I1a1b1a4a2a~	8250539	C	T	Y15505	0	0	0	1	0	1	1															CT	16346371	C	T	CTS5532/M5694	0	0	0	2	0	2
													I1a2a2a4b~	14790837	A	G	S16414	0	0	1	0	0	1	1															CT	16465771	T	G	CTS5746/M5697	0	0	3	0	0	3
													I1a3g~	7640268	C	T	BY391	0	0	0	1	0	1	1															CT	16770207	G	A	CTS6252/M5700	3	0	0	0	0	3
													I2	19321949	C	T	CTS10194/PF3791/V4013/Z2660	0	0	0	2	0	2	2															CT	16822011	A	G	CTS6327/M5705	0	0	6	0	0	6
													I2	16671358	C	A	CTS6096/PF3749/Z2654	1	0	0	0	0	1	1															CT	16865757	C	G	CTS6383/M5707	0	0	5	0	0	5
													I2	18032844	A	G	CTS8444/Z2658	0	0	2	0	0	2	2															CT	17114434	C	T	CTS6800/M5713	0	0	0	3	0	3
													I2	18700150	C	T	L68/PF3781/S329	0	0	0	2	0	2	2															CT	17174326	G	C	CTS6890/M5714	0	4	0	0	0	4
													I2	6652911	T	C	PF3626/Z2632	0	2	0	0	0	2	2															CT	17186912	C	T	CTS6907/M5715	0	0	0	1	0	1
													I2	8211182	C	G	PF3651	0	0	3	0	0	3	3															CT	17502617	A	G	CTS7482/M5720	0	0	2	0	0	2
													I2	8392226	G	A	PF3657/Z2636	4	0	0	0	0	4	4															CT	17517587	T	A	CTS7517/M5722	2	0	0	0	0	2
													I2	8443332	A	G	PF3658/V1992/Z2637	0	0	1	0	0	1	1															CT	17639829	C	T	CTS7741/M5725	0	0	0	6	0	6
													I2	8567995	G	A	PF3664.1/V2273.1/Z2638.1	3	0	0	0	0	3	3															CT	17742131	C	T	CTS7922/M5727	0	0	0	13	0	13
													I2~	21585551	A	G	PF3810/Z2665	0	0	5	0	0	5	5															CT	17750457	C	T	CTS7933/M5728	0	0	0	1	0	1
													I2~	22517990	A	T	PF3835/Z2670	0	0	0	1	0	1	1															CT	17751557	A	T	CTS7936/M5729	0	0	0	5	0	5
													I2a	14072906	T	A	CTS1799/PF3698/Z2645	1	0	0	0	0	1	1															CT	17894575	C	T	CTS8243/M5736	0	0	0	6	0	6
													I2a	14238700	G	T	CTS2257/PF3704/Z2647	0	0	0	2	0	2	2															CT	18592845	G	A	CTS8980/M5748	4	0	0	0	0	4
													I2a	14993327	C	G	CTS3529/PF3720/Z2649	0	0	1	0	0	1	1															CT	18616467	T	A	CTS9014/M5750	4	0	0	0	0	4
													I2a	15349855	G	A	CTS4039/PF3723/Z2650	2	0	0	0	0	2	2															CT	18905190	G	A	CTS9458/M5753	3	0	0	0	0	3
													I2a	15354989	G	A	CTS4047/PF3724	2	0	0	0	0	2	2															CT	18961511	G	C	CTS9555/M5757	0	3	0	0	0	3
													I2a	21155258	T	C	PF3798/Z2662	0	1	0	0	0	1	1															CT	18961874	C	A	CTS9556/M5758	5	0	0	0	0	5
													I2a	21414141	T	A	PF3801/Z2663	2	0	0	0	0	2	2															CT	19059200	C	A	CTS9760/M5763	2	0	0	0	0	2
													I2a1	7879415	A	C	L460/PF3647/S238	0	1	0	0	0	1	1															CT	19090637	C	G	CTS9828/M5764	0	0	5	0	0	5
													I2a1a2	21517454	C	T	AM01285/S2750/Z2605	0	0	0	1	0	1	1															CT	19167672	G	C	CTS9948	0	5	0	0	0	5
													I2a1a2a	22513718	C	T	L161.1/S185.1	0	0	0	1	0	1	1															CT	6975295	C	G	L1462/M5587	1	0	1	0	0	1
													I2a1b	18210929	T	C	CTS8799	0	1	0	0	0	1	1															CT	19212465	A	G	L1480/M5766	0	0	6	0	0	6
													I2a1b	24409110	C	T	FGC3522/S6528	0	0	0	2	0	2	2															CT	22631570	A	G	L1492/Y1569	0	0	5	0	0	5
													I2a1b	19384600	C	G	FGC3527/Y3253	0	0	2	0	0	2	2															CT	14079528	C	T	L957	0	0	0	4	0	4
													I2a1b	21909687	A	G	FGC3538/Y3254	0	0	1	0	0	1	1															CT	21674378	C	T	L970/PF1065	0	0	0	1	0	1
													I2a1b	19077754	G	T	L181	0	0	0	4	0	4	4															CT	23302389	A	G	L977	0	0	4	0	0	4
													I2a1b	22725379	C	A	L35/PF3862/S150	2	0	0	0	0	2	2															CT	14813991	C	T	M168/PF1416	0	0	0	3	0	3
													I2a1b	6931594	C	T	L368	0	0	0	1	0	1	1															CT	22744945	C	T	M294	0	0	0	4	0	4
													I2a1b	7883549	G	A	L800	2	0	0	0	0	2	2															CT	2757670	C	T	M5577/PF1413/V189	0	0	0	2	0	2
													I2a1b	13992338	C	G	P216/PF3855/S30	0	0	2	0	0	2	2															CT	6619341	C	A	M5578	2	0	0	0	0	2
													I2a1b1~	16179621	C	T	CTS5279	0	0	0	1	0	1	1															CT	6864267	A	G	M5585/PF1414/V9	0	0	1	0	0	1
													I2a1b1a2a2a	14288983	G	A	L703	1	0	0	0	0	1	1															CT	6991000	C	A	M5588/PF210	1	0	0	0	0	1
													I2a1b1a2b3a~	7873689	C	T	Y10672	0	0	0	1	0	1	1															CT	7041647	G	A	M5590	5	0	0	0	0	5
													I2a1b2	8193321	T	C	FGC29562/Y10705	0	1	0	0	0	1	1															CT	7153375	C	T	M5591/PF223	0	0	0	1	0	1
													I2a1b2	21981930	A	G	S2599	0	0	2	0	0	2	2															CT	7358315	A	G	M5599/PF234	0	0	6	0	0	6
													I2a1b2	17962886	A	T	SK1262/Y11315	0	0	0	1	0	1	1															CT	7416169	T	C	M5600	0	4	0	0	0	4
													I2a1b2a1a1	14276325	C	T	Y49275	0	0	0	1	0	1	1															CT	7533511	G	A	M5601	2	0	0	0	0	2
													I2a2a1a~	13832752	G	A	Y7859	1	0	0	0	0	1	1															CT	7597185	G	A	M5603/PF1415/V226	1	0	0	0	0	1
													I2b	13852471	C	T	BY32175	0	0	0	1	0	1	1															CT	7646619	G	C	M5605	0	2	0	0	0	2
													I2b	18657621	C	T	BY32215	0	0	0	1	0	1	1															CT	7707388	T	G	M5606	0	0	2	0	0	2
													IJ	19324937	G	A	CTS10200	1	0	0	0	0	1	1															CT	7707484	C	A	M5607	3	0	0	0	0	3
													IJ	16244914	G	A	CTS5387/Y1887	1	0	0	0	0	1	1															CT	7729324	C	T	M5608/PF258	0	0	0	4	0	4
													IJ	17200869	G	A	CTS6932/FGC1565	3	0	0	0	0	3	3															CT	7738840	T	G	M5609	0	0	2	0	0	2
													IJ	16966024	T	C	F2345/FGC1577	0	1	0	0	0	1	1															CT	7740081	G	A	M5610	2	0	0	0	0	2
													IJ	18633084	C	A	F2794/V3346/YSC0001311	3	0	0	0	0	3	3															CT	7778691	C	T	M5611/PF263	0	0	0	5	0	5
													IJ	22909101	C	T	F3368/PF3566/YSC0001317	0	0	0	2	0	2	2															CT	7782393	C	T	M5612	0	0	0	2	0	2
													IJ	19166861	T	C	F4281/P123/PF3554	0	1	0	0	0	1	1															CT	7796647	C	T	M5613	0	0	0	5	0	5
													IJ	7694266	G	A	FGC1564/YSC0000070	1	0	0	0	0	1	1															CT	7887815	A	T	M5615	0	0	0	4	0	4
													IJ	21225770	C	G	FGC1566/P126	0	0	1	0	0	1	1															CT	7921525	A	G	M5616/PF272	0	0	3	0	0	3
													IJ	21321273	A	T	FGC1571/Y1905	0	0	0	3	0	3	3															CT	7970612	G	A	M5619/PF278	5	0	0	0	0	5
													IJ	8222299	T	C	FGC1573/L403	0	2	0	0	0	2	2															CT	8080397	T	A	M5622	2	0	0	0	0	2
													IJ	13676377	G	T	FGC1574	0	0	0	1	0	1	1															CT	8124473	G	T	M5624	0	0	0	3	0	3
													IJ	24409110	C	T	FGC3522	0	0	0	2	0	2	2															CT	8183439	G	A	M5627	6	0	0	0	0	6
													IJ	17012180	C	A	L748/PF3546/YSC0000289	1	0	0	0	0	1	1															CT	8262951	T	C	M5629	0	5	0	0	0	5
													IJ	14031334	T	A	M429/P125/PF3535	1	0	0	0	0	1	1															CT	8396636	G	A	M5631/PF292	3	0	0	0	0	3
													IJ	21461202	G	A	PF3562	3	0	0	0	0	3	3															CT	8526565	G	A	M5632	5	0	0	0	0	5
													IJ	21389837	A	G	Z40732	0	0	1	0	0	1	1															CT	8543804	G	A	M5633	7	0	0	0	0	7
													IJK	7629583	A	G	F3689/M2682/PF3495/Y2571	0	0	2	0	0	2	2															CT	8635526	C	A	M5636	8	0	0	0	0	8
													IJK	7173143	G	A	L16/M522/PF3493/S138	1	0	0	0	0	1	1															CT	8849835	C	A	M5639	1	0	0	0	0	1
													IJK	7702973	T	A	M2683/PF3496/YSC0001318	7	0	0	0	0	7	7															CT	8867489	T	C	M5640	0	1	0	0	0	1
													IJK	7792789	G	A	M2684/PF3497/YSC0001319	1	0	0	0	0	1	1															CT	9094343	C	T	M5642	0	0	0	2	0	2
													IJK	21571895	G	A	M2696/PF3500	1	0	0	0	0	1	1															CT	14043535	A	C	M5648	0	2	0	0	0	2
													J1a2a1a2d~	7575417	C	T	Z1852	0	0	0	1	0	1	1															CT	14065693	C	A	M5649	9	0	0	0	0	9
													J1a2a1a2d1~	23597053	G	A	ZS1321	1	0	0	0	0	1	1															CT	14149520	T	A	M5652	1	0	0	0	0	1
													J1a2a1a2d2b2b2c2a~	17205362	G	A	S19350	1	0	0	0	0	1	1															CT	14207088	C	A	M5656	11	0	0	0	0	11
													J1a2a1a2d2b2b2c2c1a3~	17404956	G	A	ZS4342	1	0	0	0	0	1	1															CT	15344987	T	C	M5675/PF719	0	5	0	0	0	5
													J1a2a1a2d2b2b2c4c4a1a1b~	14310936	G	A	ZS1350	1	0	0	0	0	1	1															CT	15662994	G	A	M5682	2	0	0	0	0	2
													J1a2b1b2a~	21259193	C	T	ZS7028	0	0	0	1	0	1	1															CT	16262390	T	A	M5691/PF779	1	0	0	0	0	1
													J2a1a~	14204962	G	A	CTS2167	1	0	0	0	0	1	1															CT	16325663	A	C	M5692	0	6	0	0	0	6
													J2a1a2a~	21258549	C	T	PH4744	0	0	0	1	0	1	1															CT	16430957	G	A	M5695/PF1417/V41	1	0	0	0	0	1
													J2a2a1a1a2b1a~	23973521	G	A	L582	1	0	0	0	0	1	1															CT	16542862	A	T	M5698/PF796	0	0	0	2	0	2
													J2b2a1a1a1a1a1a1f1b1a~	7228013	G	A	Y21460	1	0	0	0	0	1	1															CT	16844116	G	A	M5706/PF815	2	0	0	0	0	2
													J2b2a1a1a1a1b~	8567995	G	A	PF3664.2/V2273.2/Z2638.2	3	0	0	0	0	3	3															CT	16877090	G	A	M5708	3	0	0	0	0	3
													J2b2a2~	10048267	G	A	Y966	1	0	0	0	0	1	1															CT	16887784	G	C	M5709	0	9	0	0	0	9
													J2b2a2b1a1a~	9914673	G	A	Y33942	1	0	0	0	0	1	1															CT	16984364	G	T	M5711/PF821	0	0	0	6	0	6
													K2b	16222561	C	T	M1221/P331/PF5911	0	0	0	1	0	1	1															CT	17104433	A	C	M5712	0	3	0	0	0	3
													L	16733577	G	A	PF5779	1	0	0	0	0	1	1															CT	17301733	T	C	M5716/PF840	0	2	0	0	0	2
													L1~	7941534	C	T	M2394	0	0	0	1	0	1	1															CT	17515027	G	A	M5721/PF1418/V52	3	0	0	0	0	3
													L1a1b3a	16461948	C	T	Z5931	0	0	0	1	0	1	1															CT	17589395	G	A	M5723	2	0	0	0	0	2
													L1a2	16900247	A	G	M5710	0	0	1	0	0	1	1															CT	17670046	C	A	M5726	6	0	0	0	0	6
													L1a2	21155258	T	C	Z2662	0	1	0	0	0	1	1															CT	17753650	A	G	M5730	0	0	2	0	0	2
													L1a2b1~	22816563	G	A	FGC32292/Y6291	1	0	0	0	0	1	1															CT	17897543	C	T	M5737/PF892	0	0	0	3	0	3
													LT [K1]	9444545	C	T	PF5535	0	0	0	1	0	1	1															CT	17909505	G	A	M5738	3	0	0	0	0	3
													N	18269675	C	T	CTS8893	0	0	0	1	0	1	1															CT	18052319	C	T	M5741	0	0	0	1	0	1
													N~	24461802	C	T	M2303/Z5049	0	0	0	1	0	1	1															CT	18106506	G	A	M5745	2	0	0	0	0	2
													N1	23755132	G	A	F3526/M2299	1	0	0	0	0	1	1															CT	18179043	C	A	M5747	2	0	0	0	0	2
													N1a1a1a1a2a1a1a1b1b~	14515472	G	A	Z5894	1	0	0	0	0	1	1															CT	18607673	T	A	M5749	6	0	0	0	0	6
													N1a1a1a2b2	17379759	G	A	Z35196	1	0	0	0	0	1	1															CT	18715075	A	G	M5751/PF937	0	0	8	0	0	8
													N1a2~	15500767	G	A	FGC10792/Y3062	1	0	0	0	0	1	1															CT	18940202	A	G	M5754	0	0	3	0	0	3
													N1a2a	15500767	G	A	FGC10792/Y3062	1	0	0	0	0	1	1															CT	18948988	T	C	M5756/PF951	0	4	0	0	0	4
													O(Notes)	21903777	G	C	L681	0	1	0	0	0	1	1															CT	18974195	C	T	M5760	0	0	0	3	0	3
													O1b1a1a1a1b1a1a2b1	6738624	T	C	MF14236	0	1	0	0	0	1	1															CT	19481868	C	A	M5771	2	0	0	0	0	2
													O2a1a1b1a2b2	8548429	C	T	ALK841.2	0	0	0	1	0	1	1															CT	21250559	C	G	M5775	0	0	2	0	0	2
													O2a1b1a1a1a1	16195787	C	T	F325	0	0	0	1	0	1	1															CT	21258894	T	C	M5776/PF1029	0	1	0	0	0	1
													O2a1b1a1a1a1b1a1b3	17076961	G	A	F2375	1	0	0	0	0	1	1															CT	21267676	C	T	M5777	0	0	0	3	0	3
													O2a1b1a1a1b	6795544	G	A	PH203	1	0	0	0	0	1	1															CT	21281606	G	C	M5778/PF1031	0	6	0	0	0	6
													O2a2a1a2a2	23370512	G	A	Y26457	1	0	0	0	0	1	1															CT	21353965	C	T	M5781/PF1040	0	0	0	8	0	8
													O2a2b1a1a1a3a1	15997889	G	A	CTS5063	1	0	0	0	0	1	1															CT	21413635	A	C	M5782/PF1046	0	9	0	0	0	9
													O2a2b2a2b1	16731107	C	T	A17431	0	0	0	1	0	1	1															CT	21429988	A	G	M5783	0	0	12	0	0	12
													Q1a1a	14830200	G	A	F1843	1	0	0	0	0	1	1															CT	21650381	A	G	M5786/PF1061	0	0	9	0	0	9
													Q1b1a1a1g~	28790215	G	C	PF1337.2	0	1	0	0	0	1	1															CT	21683734	C	T	M5788	0	0	0	3	0	3
													Q1b1a1a1h1a	6844661	G	A	Z5907	1	0	0	0	0	1	1															CT	22067044	A	T	M5794/PF1092	0	0	0	4	0	4
													Q1b1a1a1j1	24395100	C	T	Z19423	0	0	0	1	0	1	1															CT	22136242	C	G	M5796/PF1097	2	0	6	0	0	6
													Q1b2b1~	23604248	C	T	FGC7024/Y4794	0	0	0	1	0	1	1															CT	22571947	A	G	M5800/PF1203	0	0	4	0	0	4
													Q1b2b1a1a~	16287139	C	T	Y15685	0	0	0	1	0	1	1															CT	23090404	G	A	M5809/PF1237	1	0	0	0	0	1
													Q1b2b1b2~	17680184	C	T	F2563	0	0	0	1	0	1	1															CT	23105586	C	A	M5812	3	0	0	0	0	3
													Q2a1a1a1a2a2a2a~	16867805	C	T	BZ60	0	0	0	1	0	1	1															CT	23466468	C	T	M5819	0	0	0	1	0	1
													Q2a1a4a2b~	22464831	G	A	BY221412/BZ5094	1	0	0	0	0	1	1															CT	23561669	A	T	M5822	0	0	0	1	0	1
													Q2b	18700150	C	T	L68.2/PF3781.2/S329.2	0	0	0	2	0	2	2															CT	23567930	C	T	M5823	0	0	0	1	0	1
													Q2b	6649916	C	T	Y1171	0	0	0	1	0	1	1															CT	24443898	C	T	M5825	0	0	0	3	0	3
													R1	14424045	C	T	CTS2680	0	0	0	1	0	1	1															CT	21095622	C	T	PF1016	0	0	0	2	0	2
													R1a1	2657176	T	C	SRY10831.2	0	1	0	0	0	1	1															CT	28790215	G	C	PF1337	0	1	0	0	0	1
													R1a1a1b1a2b3a1a1a2a2~	17325948	G	A	YP5310	1	0	0	0	0	1	1															CT	9158586	G	A	PF328	3	0	0	0	0	3
													R1a1a1b1a2b3a1c2b~	15896118	C	T	Y35765	0	0	0	1	0	1	1															CT	9758726	G	A	PF342	3	0	0	0	0	3
													R1a1a1b1a3a1b2a~	21266539	G	A	YP5165	1	0	0	0	0	1	1															CT	13852599	A	G	PF629	0	0	6	0	0	6
													R1b1a1b	19054889	C	T	L757/PF6488/V3721/YSC0000293	0	0	0	1	0	1	1															CT	19169483	T	C	PF970	0	7	0	0	0	7
													R1b1a1b1a1a1c1b	19035709	G	A	S5520	1	0	0	0	0	1	1															CT	14074463	C	T	Y1525	0	0	0	2	0	2
													R1b1a1b1a1a2b1~	15115902	C	T	L409	0	0	0	1	0	1	1															CT	14472971	C	T	Y1526	0	0	0	2	0	2
													R1b1a1b1a1a2b2b~	16346146	G	A	CTS5531/PF6636	1	0	0	0	0	1	1															CT	15932327	A	G	Y1528	0	0	1	0	0	1
													R1b1a1b1a1a2c1a1a1a1a1a1a4b	15335669	C	T	A822	0	0	0	1	0	1	1															CT	16131945	C	G	Y1531	0	0	4	0	0	4
													R1b1b2a	14332361	C	T	FGC21030/Y7773/Z30279	0	0	0	1	0	1	1															CT	17975155	G	T	Y1537	0	0	0	12	0	12
													R1b2a	8285883	G	A	BY17637	1	0	0	0	0	1	1															CT	22529475	C	G	Y1567	0	0	2	0	0	2
													R2b	2722677	G	A	FGC50198	1	0	0	0	0	1	1															CT	23234852	G	A	Y1571	1	0	0	0	0	1
													S1d	14950838	C	T	Z42019	0	0	0	1	0	1	1															CT	23642375	C	T	Y1573	0	0	0	4	0	4
													S1d	23422805	G	A	Z42224	1	0	0	0	0	1	1															CT	24358251	T	C	Y1574	0	3	0	0	0	3
													S4~	8226825	C	T	Y86182	0	0	0	1	0	1	1															CT	28590906	A	T	Y1578	0	0	0	4	0	4
													T1a1a1b2b2b1a	14926202	G	A	P77	1	0	0	0	0	1	1															CT	28789895	A	T	Y1580	0	0	0	4	0	4
																																							CT	9989244	G	T	Z17706	0	0	0	4	0	4
																																							CT	13213798	G	T	Z17710	0	0	0	4	0	4
																																							CT	13652845	A	T	Z17714	0	0	0	7	0	7
																																							D1	9925473	C	T	Z3727	0	0	0	1	0	1
																																							D1a1a1a1a1b	15150938	G	A	Z44035	1	0	0	0	0	1
																																							D1a2a1c1a~	10064950	C	T	Z14831	0	0	0	1	0	1
																																							D1a2a2a2b	22860093	G	A	Z40663	1	0	0	0	0	1
																																							D1a2b2	23153274	G	A	FGC44943/Y20903	1	0	0	0	0	1
																																							D2	7079439	G	A	CTS13040	1	0	0	0	0	1
																																							E1a2a2	16831858	G	A	Z15231	1	0	0	0	0	1
																																							E1a2b1a1a1	8569964	G	A	Z14913	2	0	1	0	1	2
																																							E1a2b1a1a1	18381823	G	A	Z14951	1	0	0	0	0	1
																																							E1b1~	17443989	G	A	CTS7364/M5493/PF1726	1	0	0	0	0	1
																																							E1b1a1a1a1c1a1a3a1b2a1b~	6970370	G	A	Z37789	1	0	0	0	0	1
																																							E1b1a1a1a1c1a1a3l1~	14879386	G	A	CTS3377	1	0	0	0	0	1
																																							E1b1a1a1a1c1a1a4	22630755	G	A	Z22357	1	0	0	0	0	1
																																							E1b1a1a1a2a2a	17373263	C	T	CTS7243	0	0	0	1	0	1
																																							E1b1b1a1a2	16984015	C	T	CTS6568/PF2270/Z1234	0	0	0	1	0	1
																																							E1b1b1a1a2a1a~	6854850	C	T	Z36744	0	1	0	2	1	2
																																							E1b1b1a1a2a1a~	6895774	C	T	Z36745	0	0	0	1	0	1
																																							E1b1b1a1a2a1b~	8124473	G	T	M5624	0	0	0	3	0	3
																																							E1b1b1a1b1a6a1a2~	18708395	T	C	Z21297	0	7	0	0	0	7
																																							E1b1b1a1b1a6a1a2~	18732617	A	G	Z21298	0	0	4	0	0	4
																																							E1b1b1b1a1b3~	16761945	C	T	MZ13	0	0	0	1	0	1
																																							E1b1b1b1b1a~	23768261	G	A	FGC18923/Y10561	2	0	0	0	0	2
																																							E1b1b1b1b1b	23147656	G	A	PF2462	2	0	1	0	1	2
																																							E1b1b1b2a1a~	6661728	C	T	Z841	0	0	0	1	0	1
																																							E1b1b1b2a1a1a1a1a1a~	14641492	G	A	PH1393	1	0	0	0	0	1
																																							E1b1b1b2a1b1~	7634867	G	A	PF2028	1	0	0	0	0	1
																																							E1b1b1b2b2a1a1b~	22157629	C	T	M5797.2	0	0	0	3	0	3
																																							E2	14564985	G	A	Z15744	1	0	0	0	0	1
																																							F	28650343	C	G	CTS12632/M3771/PF2775	0	0	2	0	0	2
																																							F	14996960	A	G	CTS3536/M3688/PF2666	1	0	5	0	1	5
																																							F	15095345	A	G	CTS3654/M3689/PF2667	0	0	2	0	0	2
																																							F	15323154	A	G	CTS3996/M3692/PF2671	1	0	3	0	1	3
																																							F	16690780	T	C	CTS6135/M3708/PF2693	0	4	0	0	0	4
																																							F	7671530	G	A	F1046/M3646/PF2610/YSC0001295	4	0	0	0	0	4
																																							F	8442341	A	G	F1209/M3654/YSC0001297	2	0	5	0	2	5
																																							F	8572150	G	A	F1320/M3657/PF2621	5	0	1	0	1	5
																																							F	14149772	C	T	F1704/M3675/PF2651	0	0	0	3	0	3
																																							F	14171665	C	T	F1714/M3677/PF2653	0	0	0	5	0	5
																																							F	14294504	T	G	F1753/M3681/PF2658	0	0	1	0	0	1
																																							F	14334396	G	T	F1767/M3683/PF2660	0	0	0	1	0	1
																																							F	15955432	A	T	F2048/M3701/PF2683/V3268	0	0	0	2	0	2
																																							F	16178042	A	T	F2075/PF2685	0	0	0	1	0	1
																																							F	16364286	C	A	F2142/PF2688	3	0	0	0	0	3
																																							F	16401339	C	T	F2155/M3704/PF2690	0	0	0	5	0	5
																																							F	17152659	T	C	F2402/M3714/PF2700	0	2	0	1	1	2
																																							F	17762668	T	C	F2587/M3719/PF2709/YSC0001308	0	2	0	0	0	2
																																							F	18051289	C	G	F2688/M3722/PF2716	0	0	4	0	0	4
																																							F	18765649	T	C	F2837/M3726/PF2722	0	8	0	0	0	8
																																							F	19220444	A	G	F2985/M3736/PF2731	0	0	3	0	0	3
																																							F	19237093	G	T	F2993/M3737/PF2732/V3940	0	0	0	3	0	3
																																							F	21080707	A	G	F3111/M3740/PF2736	0	0	6	0	0	6
																																							F	21147336	T	C	F3136/M3741/PF2737	0	3	0	1	1	3
																																							F	8131538	G	T	F3692/M3650	0	0	0	5	0	5
																																							F	2722506	G	A	F719/IMS-JST00305/M3636/S8235	3	0	0	0	0	3
																																							F	17464197	T	C	L132.1	0	12	0	1	1	12
																																							F	16368310	A	G	L468/M3703/PF2689	0	0	7	0	0	7
																																							F	19205814	A	T	L470/M3735/PF2730	0	0	0	6	0	6
																																							F	21811276	C	T	L882/M3749/PF2745	0	0	0	10	0	10
																																							F	15526751	T	C	M213/P137/Page38/PF2673	0	1	0	0	0	1
																																							F	14832620	T	G	M235/Page80/PF2665	0	0	3	0	0	3
																																							F	2863665	A	G	M3638/PF2590/V205	0	0	2	0	0	2
																																							F	2912385	T	C	M3639/PF2591	0	4	0	0	0	4
																																							F	7726849	A	G	M3647/PF2611	1	0	2	0	1	2
																																							F	22108101	G	A	M3751/PF2748	1	0	0	0	0	1
																																							F	22156498	C	A	M3752/PF2749	10	0	0	0	0	10
																																							F	21917313	C	T	M89/PF2746	0	0	0	1	0	1
																																							F	7395806	C	G	P134/PF2606	0	0	3	0	0	3
																																							F	21618856	C	T	P135/PF2741	0	0	0	1	0	1
																																							F	23040647	T	G	P136/PF2762	0	0	1	0	0	1
																																							F	14199284	T	C	P138/PF2655	0	8	0	0	0	8
																																							F	16906683	G	A	P139/PF2698	3	0	0	0	0	3
																																							F	17398598	C	T	P14/PF2704	0	0	0	5	0	5
																																							F	17311975	G	C	P140/PF2703	0	3	0	0	0	3
																																							F	6941218	G	A	P141/PF2602	8	0	0	0	0	8
																																							F	8424089	G	A	P145/PF2617	3	0	0	0	0	3
																																							F	8602415	C	T	P146/PF2623	0	0	0	5	0	5
																																							F	19349615	C	T	P148/PF2734	0	0	0	3	0	3
																																							F	18578476	G	A	P149/PF2720	7	0	0	0	0	7
																																							F	8680661	T	C	P151/PF2625	0	7	0	1	1	7
																																							F	24359931	T	C	P157/PF2771	0	9	0	1	1	9
																																							F	17493513	C	T	P158/PF2706	0	0	0	6	0	6
																																							F	18097251	C	A	P159/PF2717	6	0	0	0	0	6
																																							F	8474189	A	C	P160/PF2618	0	2	0	0	0	2
																																							F	16242316	A	T	P163/PF2686	0	0	0	2	0	2
																																							F	17256018	C	T	P166/PF2702	0	0	0	2	0	2
																																							F	9108252	G	T	P187/PF2632	0	0	0	4	0	4
																																							F	16839641	A	T	P316/PF2696	0	0	0	6	0	6
																																							F	7517055	G	C	PF2608	0	3	0	0	0	3
																																							F	15234830	A	T	PF2669	0	0	0	5	0	5
																																							G2a2a	21822756	C	T	PF3182	0	0	0	1	0	1
																																							G2a2a1a1~	15776365	C	G	FGC58149	0	0	2	0	0	2
																																							G2a2a1a2a1	18830899	G	A	FGC5662^/Z6477^	1	0	0	0	0	1
																																							G2a2a1a2a3~	15929372	G	A	FT157301	2	0	0	0	0	2
																																							G2a2b1b1a1b1d1	17611794	G	A	Y26017.2/Z42076.2	1	0	0	0	0	1
																																							G2a2b1b1a1b5	8622606	C	T	BY169572	0	0	0	1	0	1
																																							G2a2b1b1a1c1a~	7540096	C	T	BY65046/Z46339	0	0	0	1	0	1
																																							G2a2b1b1a1c1a~	8729974	G	A	BY74400/Z46343	2	0	0	0	0	2
																																							G2a2b2a1a1a1b1b1b1	23861838	G	A	BY168833^^	1	0	0	0	0	1
																																							G2a2b2a1a1a1b2a	23342346	C	T	Y18497/Z38325	0	0	0	1	0	1
																																							G2a2b2a1a1b1	8147611	C	T	Z3205	0	0	0	1	0	1
																																							G2a2b2a1a1b1a1a1a1a2	24370305	G	A	BY27884	1	0	0	0	0	1
																																							G2a2b2a1a1b1a1a1a1c3c	13655424	G	A	FGC63953	1	0	0	0	0	1
																																							G2a2b2a1a1b1a1a2a1a1b1d3~	9741858	C	T	FT133712^^	0	0	0	2	0	2
																																							G2a2b2a1a1b1a1a2a1b2a4a2~	7070959	C	T	Y83293	0	0	0	1	0	1
																																							G2a2b2a1a1b1a1a2a1b2b~	23310510	G	A	FT48368	1	0	0	0	0	1
																																							G2a2b2a1a1b1a1a2b1a1a3a	23540967	G	A	BY146083	2	0	1	0	1	2
																																							G2a2b2a1a1b1a1c2~	8097522	C	T	FT137556	0	0	0	1	0	1
																																							G2a2b2a1a1e	7080446	C	T	BY15859	0	1	0	2	1	2
																																							G2a2b2a1a1e	21161570	G	A	BY15887	1	0	0	0	0	1
																																							G2a2b2a4a3~	22205093	G	A	FT54878	1	0	0	0	0	1
																																							G2a2b2a4b	9133911	G	A	MF31946.2^^	1	0	0	0	0	1
																																							G2a2b2b1a1a2a3b2a~	24355035	C	T	FT150175	0	0	0	1	0	1
																																							G2a2b2b1a1a2d~	15847639	C	T	F20214.2^^	0	0	0	1	0	1
																																							G2a2b2b1b	19087384	G	A	FGC41985	1	0	0	0	0	1
																																							GHIJK	14237670	C	T	CTS2254/M3680/PF2657	0	0	0	2	0	2
																																							H1a1a5~	16174297	C	T	F2072	0	0	0	1	0	1
																																							H2	22566420	G	A	Z18995	1	0	0	0	0	1
																																							H2~	18414823	G	A	Y21638	1	0	0	0	0	1
																																							H3a2	8071284	G	A	Z12769	1	0	0	0	0	1
																																							H3b1	23502589	G	A	Z13870	2	0	0	0	0	2
																																							HIJK	7202703	C	T	F929/M578/PF3494/S6378	0	0	0	4	0	4
																																							I	14646409	C	T	CTS3076/PF3712	0	0	0	1	0	1
																																							I	19104986	G	A	CTS9860/PF3790	3	0	2	0	2	3
																																							I	7853028	C	A	PF3645/V1476	1	0	0	0	0	1
																																							I1	16869992	G	A	CTS6395/Z2803	3	0	2	0	2	3
																																							I1	7656352	T	G	FGC2432/V1339/Z2712	0	0	1	0	0	1
																																							I1	6681479	T	G	FGC2438/S108/Y1864	0	0	2	1	1	2
																																							I1	22011964	G	A	Z2855^	1	0	0	0	0	1
																																							I1a1b1a1b3a~	22587260	G	A	FGC21603	1	0	0	0	0	1
																																							I1a1b1a1e2c1a~	14647555	C	T	FGC13277/Y7530	0	0	0	1	0	1
																																							I1a1b1a4a2b2~	14706422	G	A	FGC15305	1	0	0	0	0	1
																																							I1a1b1b1c~	14103128	C	T	Y23146	0	0	0	1	0	1
																																							I1a2a1a1d2a1a~	8833551	A	G	M5638	0	0	3	0	0	3
																																							I1a2a2a3a4~	19008423	G	A	BY1487/Y7929	2	0	1	0	1	2
																																							I1a2a2a5~	22965821	C	T	Y19607	0	0	0	1	0	1
																																							I1c1a1a1a1~	14482042	C	T	Z8084	0	0	0	1	0	1
																																							I2a1a1a1a1a1a1c5~	15813655	G	A	PF7099	6	0	0	0	0	6
																																							I2a1a1a1a1a1a1e5e1~	2906179	G	A	Z26838	1	0	0	0	0	1
																																							I2a1a1a1a2a1a~	18685042	C	T	Z27437	0	1	0	2	1	2
																																							I2a1a1b2a~	6889506	G	A	Y22816	1	0	0	0	0	1
																																							I2a1b1a1a1b1a~	14396927	T	G	Y6024	0	0	2	0	0	2
																																							I2a1b1a2a~	7673306	G	A	S10491	3	0	2	0	2	3
																																							I2a1b1a2a2a1~	8470433	G	T	Y8549	0	0	0	3	0	3
																																							I2a1b1a2b1a2a2a1~	6731825	G	A	Y5718	1	0	0	0	0	1
																																							I2a1b1a2b1a2a3a1~	6740034	C	A	M8963.2	1	0	0	0	0	1
																																							I2a1b1a2b1a3a1a~	15954753	G	A	Y6644	1	0	0	0	0	1
																																							I2a1b1b~	18945240	C	T	CTS9515/M744	0	0	0	1	0	1
																																							I2a2a1a1a2	15944828	G	C	F313/M1219	0	6	0	0	0	6
																																							I2a2b1c2~	14987695	G	A	Y92711	1	0	0	0	0	1
																																							I2a2b1g~	15248802	G	A	Y67925	1	0	0	0	0	1
																																							I2b	9461356	G	A	BY49911	1	0	0	0	0	1
																																							IJK	7629583	A	G	F3689/M2682/PF3495/Y2571	0	0	2	0	0	2
																																							IJK	6753519	A	G	L15/M523/PF3492/S137	0	0	2	0	0	2
																																							IJK	7173143	G	A	L16/M522/PF3493/S138	3	0	0	0	0	3
																																							IJK	7702973	T	A	M2683/PF3496/YSC0001318	4	0	0	0	0	4
																																							IJK	7792789	G	A	M2684/PF3497/YSC0001319	1	0	0	0	0	1
																																							IJK	21571895	G	A	M2696/PF3500	6	0	0	0	0	6
																																							J1	6644192	T	C	FGC1617/Y2313	0	1	0	0	0	1
																																							J1	8120373	G	A	PF4659	1	0	0	0	0	1
																																							J1a2a1a1a~	7402599	G	A	ZS9834	2	0	1	0	1	2
																																							J1a2a1a2d2b2b2c4d2a2a5a1e4a4~	23153274	G	A	FGC44943/Y20903	1	0	0	0	0	1
																																							J1a2a1a2d2b2b2c4d2a2a5a1e4a6k~	8592084	C	T	FGC4474	0	0	0	1	0	1
																																							J1b	18557394	C	T	ZS103	0	0	0	1	0	1
																																							J1b1a~	23068825	C	T	ZS138	0	0	0	1	0	1
																																							J2a1	23033706	C	T	CTS11251/PF5112	0	0	0	1	0	1
																																							J2b2a2a1~	14707829	G	A	Y29540	1	0	0	0	0	1
																																							J2b2a2b2a1a~	14220340	C	T	Z8348	0	0	0	1	0	1
																																							K	21730257	C	G	M9/PF5506	0	0	5	0	0	5
																																							K~	20837553	C	T	P128/PF5504	0	0	0	4	0	4
																																							K~	15472863	C	T	P131/PF5493	0	0	0	5	0	5
																																							K~	8679843	G	T	P132/PF5480	0	0	0	7	0	7
																																							K2	23550924	A	C	M526/PF5979	0	4	0	0	0	4
																																							K2b	16222561	C	T	M1221/P331/PF5911	0	0	0	3	0	3
																																							L1a2	16900247	A	G	M5710	0	0	1	0	0	1
																																							M1a1a3b1a~	2683463	C	T	Z42293	0	0	0	1	0	1
																																							N1a1a1a1a	7855600	T	C	Z4846^	0	4	0	0	0	4
																																							N1a1a1a1a1a1a2a1~	7170954	G	A	CTS1050	1	0	0	0	0	1
																																							N1a1a1a1a1a1a2a1~	6670461	T	G	L58	0	0	2	0	0	2
																																							N1a1a1a1a1a1a6a1~	15347791	C	T	Y17648	0	0	0	1	0	1
																																							N1a1a1a1a2a1a1a1a1b~	19041371	G	A	Z35290	1	0	0	0	0	1
																																							N1a1a1a1a3a2c2	28740121	C	T	Z35339	0	0	0	1	0	1
																																							N1a1a3~	17431587	T	G	YP5796	0	0	3	0	0	3
																																							N1b1	23561006	C	T	Y6610/Z19700	0	0	0	1	0	1
																																							N1b2	22084580	G	A	Z19760	1	0	0	0	0	1
																																							O(Notes)	21903777	G	C	L681	0	1	0	0	0	1
																																							O(Notes)	21900347	C	G	N10	0	0	1	0	0	1
																																							O1b1a1a1a1b1a1a2b1	6738624	T	C	MF14236	0	2	0	0	0	2
																																							O2a1b1a1a1a1a1a1b1f	18552726	C	T	F2770	0	0	0	7	0	7
																																							O2a1b1a2a	16298105	G	A	CTS5467	1	0	0	0	0	1
																																							O2a1b1b1	8796119	C	T	MF1350	0	0	0	1	0	1
																																							P or K2b2	7963031	T	G	P295/PF5866/S8	0	0	4	1	1	4
																																							P1 or K2b2a	19245417	C	A	CTS10081/M1249/PF5947	3	1	0	0	1	3
																																							P1 or K2b2a	19246561	A	G	CTS10085/M1250/PF5948	0	0	1	0	0	1
																																							P1 or K2b2a	19303108	A	C	CTS10168/M1149	0	1	0	0	0	1
																																							P1 or K2b2a	19417241	G	A	CTS10348/M1252/PF5950	4	0	1	0	1	4
																																							P1 or K2b2a	23431541	A	G	CTS12028/M1272/PF5977	0	0	1	0	0	1
																																							P1 or K2b2a	2803717	C	T	CTS196/PF5845	0	0	0	2	0	2
																																							P1 or K2b2a	2817429	C	G	CTS216/M1184/PF5846	0	0	2	0	0	2
																																							P1 or K2b2a	14679362	C	A	CTS3135/M1206/PF5898	4	1	0	0	1	4
																																							P1 or K2b2a	14864191	T	C	CTS3358/M1210/PF5900	0	1	0	0	0	1
																																							P1 or K2b2a	14933671	C	A	CTS3446/M1211/PF5902	1	0	0	0	0	1
																																							P1 or K2b2a	15172515	C	G	CTS3775/M1214/PF5906	0	0	1	0	0	1
																																							P1 or K2b2a	15202608	G	C	CTS3813/M1215/PF5491	0	1	0	0	0	1
																																							P1 or K2b2a	16263188	T	C	CTS5418/M1222/PF5912	0	3	0	0	0	3
																																							P1 or K2b2a	16425449	C	T	CTS5673/M1225/PF5497/YSC0001285	0	2	0	3	2	3
																																							P1 or K2b2a	16489668	G	T	CTS5808/M1226/PF5915	0	0	0	3	0	3
																																							P1 or K2b2a	16535034	A	G	CTS5884/M1228/PF5917	0	0	4	0	0	4
																																							P1 or K2b2a	6931040	C	G	CTS655/M5586/PF5858	0	0	10	0	0	10
																																							P1 or K2b2a	17206350	G	T	CTS6948/M1231/PF5922	0	0	0	1	0	1
																																							P1 or K2b2a	17341676	A	G	CTS7194/M1232/PF5923	0	0	3	0	0	3
																																							P1 or K2b2a	17374007	G	T	CTS7244/M1233/PF5924	0	0	0	3	0	3
																																							P1 or K2b2a	17502468	C	T	CTS7481/M1234/PF5926	0	0	0	1	0	1
																																							P1 or K2b2a	17559652	T	C	CTS7604/M1235/PF5928	0	3	0	0	0	3
																																							P1 or K2b2a	18116596	C	T	CTS8626/M1239/PF5934	0	0	0	1	0	1
																																							P1 or K2b2a	18720028	C	T	CTS9162/L1185/M1241/PF5937	0	0	0	5	0	5
																																							P1 or K2b2a	13220892	C	T	F1660/PF5889	0	0	0	3	0	3
																																							P1 or K2b2a	9098922	C	T	F180/M1196/PF5881	0	1	0	3	1	3
																																							P1 or K2b2a	9841700	G	C	F212/M1198/PF5885	0	2	0	0	0	2
																																							P1 or K2b2a	6630931	A	G	F29/L821/M5579/PF5857	0	0	2	0	0	2
																																							P1 or K2b2a	15944828	G	C	F313/M1219	0	6	0	0	0	6
																																							P1 or K2b2a	16331558	G	A	F332/M1224/PF5914	6	0	2	0	2	6
																																							P1 or K2b2a	2686727	G	A	F4/M1183/PF5991	2	0	0	0	0	2
																																							P1 or K2b2a	18831084	A	G	F506/M1243/PF5940	0	0	3	0	0	3
																																							P1 or K2b2a	19144375	C	T	F524/M1248/PF5945	0	0	0	4	0	4
																																							P1 or K2b2a	19315988	A	T	F536/M1251/PF5949	1	0	0	5	1	5
																																							P1 or K2b2a	23257819	G	T	F640/M1271/PF5975	0	0	0	2	0	2
																																							P1 or K2b2a	23489203	C	T	F647/M1273/PF5978	0	0	0	2	0	2
																																							P1 or K2b2a	7549445	T	A	F83/M1185/PF5861	1	0	0	0	0	1
																																							P1 or K2b2a	7628900	G	A	F91/PF5862/V231	2	0	1	0	1	2
																																							P1 or K2b2a	10035664	G	C	FGC285	0	1	0	0	0	1
																																							P1 or K2b2a	22514081	G	T	L82/PF5972	0	0	0	5	0	5
																																							P1 or K2b2a	21603164	T	G	M1160/PF5958	0	0	1	0	0	1
																																							P1 or K2b2a	7848043	C	G	M1186/PF5764	0	0	1	0	0	1
																																							P1 or K2b2a	7917959	A	G	M1187/PF5865	0	0	1	0	0	1
																																							P1 or K2b2a	8096754	T	C	M1188/PF5869	0	1	0	0	0	1
																																							P1 or K2b2a	8257661	A	G	M1190/PF5871	1	0	4	0	1	4
																																							P1 or K2b2a	8705980	C	T	M1193/PF5876	0	0	0	1	0	1
																																							P1 or K2b2a	9885733	A	G	M1199/PF5886	1	0	4	0	1	4
																																							P1 or K2b2a	18647146	A	C	M1240/PF5936	0	5	0	0	0	5
																																							P1 or K2b2a	19067469	C	T	M1246/PF5943	0	0	0	2	0	2
																																							P1 or K2b2a	21121986	A	T	M1254/PF6062	0	0	0	2	0	2
																																							P1 or K2b2a	21456883	G	A	M1257/PF5955	1	0	0	0	0	1
																																							P1 or K2b2a	21560146	C	T	M1259/PF5956	0	0	0	5	0	5
																																							P1 or K2b2a	21570974	G	A	M1260/PF5957	5	0	1	0	1	5
																																							P1 or K2b2a	21848764	A	C	M1262/PF5961	0	3	0	0	0	3
																																							P1 or K2b2a	21990257	C	T	M1263/PF5964	0	0	0	3	0	3
																																							P1 or K2b2a	22003770	G	A	M1264/YSC0000227	3	0	1	0	1	3
																																							P1 or K2b2a	22040221	G	C	M1265/PF5965	0	4	0	0	0	4
																																							P1 or K2b2a	22164441	G	A	M1267/Y507	1	0	0	0	0	1
																																							P1 or K2b2a	10060320	T	C	PF5483	0	3	0	0	0	3
																																							P1 or K2b2a	9171956	T	A	PF5882	2	0	0	1	1	2
																																							P1 or K2b2a	23993156	A	C	PF5982	0	2	0	0	0	2
																																							P1~ or K2b2a~	14898094	A	G	F1857/P337/Page83/PF5901	0	0	2	0	0	2
																																							P1~ or K2b2a~	28731917	A	C	L405/PF5990	1	2	0	0	1	2
																																							P1~ or K2b2a~	7340314	T	C	L536/PF5860	0	1	0	0	0	1
																																							P1~ or K2b2a~	8516929	G	A	L721/PF6020	1	0	0	0	0	1
																																							P1~ or K2b2a~	21811108	G	T	L741/PF5960/YSC0000297	0	0	0	7	0	7
																																							P1~ or K2b2a~	23342709	C	A	L768/PF5976/YSC0000274	1	0	0	0	0	1
																																							P1~ or K2b2a~	8696594	G	A	L781/PF5875/YSC0000255	3	0	0	0	0	3
																																							P1~ or K2b2a~	21867787	G	A	M45/PF5962	5	0	1	0	1	5
																																							P1~ or K2b2a~	21889767	G	A	M74/N12/PF5963	1	0	0	0	0	1
																																							P1~ or K2b2a~	8845380	C	T	P226/PF5879	0	0	0	3	0	3
																																							P1~ or K2b2a~	17508337	C	T	P228/PF5927	0	0	0	2	0	2
																																							P1~ or K2b2a~	19198212	A	G	P235/PF5946	0	0	3	0	0	3
																																							P1~ or K2b2a~	8334875	A	G	P237/PF5873	1	0	5	0	1	5
																																							P1~ or K2b2a~	17881230	G	C	P239/PF5930	0	2	1	0	1	2
																																							P1~ or K2b2a~	8685083	A	G	P243/PF5874	0	0	4	0	0	4
																																							P1~ or K2b2a~	18964263	A	G	P281/PF5941	0	0	6	0	0	6
																																							P1~ or K2b2a~	18028661	A	G	P282/PF5932	0	0	7	0	0	7
																																							P1~ or K2b2a~	22094491	C	T	P283/PF5966	0	0	0	4	0	4
																																							P1~ or K2b2a~	22072340	C	G	P284	0	0	5	0	0	5
																																							Q1a1a1a1a1~	7603400	G	A	Z43855	1	0	0	0	0	1
																																							Q1b1a1a1g~	28790215	G	C	PF1337.2	0	1	0	0	0	1
																																							Q1b1a1a1h1a	14595006	C	T	Z19527	0	0	0	1	0	1
																																							Q1b1a1a1i1a1	10014101	C	T	Z19328	0	0	0	1	0	1
																																							Q1b1a1a2b1~	18114560	C	T	Y18752	0	0	0	1	0	1
																																							Q2a1a3	18609402	C	T	BZ310	0	0	0	1	0	1
																																							Q2a1a3b~	15361047	C	T	BZ4431	0	1	0	2	1	2
																																							Q2a1c1a	7929100	C	A	Y2986	3	0	0	0	0	3
																																							R	22934109	A	G	CTS11075/M795/PF6078	0	0	4	0	0	4
																																							R	2810583	A	G	CTS207/M600/PF5992	0	0	1	0	0	1
																																							R	14750668	A	C	CTS3229/M672/PF6036/YSC0001265	1	3	0	0	1	3
																																							R	15078469	C	G	CTS3622/PF6037	0	1	2	0	1	2
																																							R	16491135	C	T	CTS5815/M696	0	0	0	2	0	2
																																							R	16882568	T	C	CTS6417/Y480	0	1	0	0	0	1
																																							R	17722802	G	A	CTS7876/PF6052	2	0	0	0	0	2
																																							R	17930099	C	A	CTS8311/M732	8	0	0	0	0	8
																																							R	18611644	A	T	CTS9005/M741	0	0	0	1	0	1
																																							R	8558505	T	C	F154/M636	0	5	0	0	0	5
																																							R	15594523	A	G	F295/M685	0	0	8	0	0	8
																																							R	6701239	G	A	F33/M603/PF6013	7	0	0	0	0	7
																																							R	16856357	T	C	F370/M708/Y479	0	4	0	0	0	4
																																							R	18017528	G	T	F459/Y482	0	0	0	1	0	1
																																							R	6868118	G	A	F47/M607/Y472	1	0	0	0	0	1
																																							R	7177189	G	A	F63/M614/PF6016	11	0	0	0	0	11
																																							R	23631629	C	A	F652/M805	3	0	0	0	0	3
																																							R	24360964	G	A	F675	3	0	0	0	0	3
																																							R	7548900	G	A	F82/M620	1	0	0	0	0	1
																																							R	15667208	G	C	FGC1168	0	2	0	0	0	2
																																							R	22733758	C	G	L1225/M789/YSC0000232	0	1	2	0	1	2
																																							R	22818334	C	T	L1347/M792/PF6077/YSC0000233	0	0	0	4	0	4
																																							R	8722476	A	T	L760/M642/PF5877/YSC0000286	0	0	0	3	0	3
																																							R	15581983	A	G	M207/Page37/UTY2	1	0	2	0	1	2
																																							R	9889199	G	A	M651/Y296	2	0	0	0	0	2
																																							R	17334694	G	T	M718	0	0	0	1	0	1
																																							R	18066156	C	T	M734/PF6057/S4/YSC0000201	0	0	0	3	0	3
																																							R	21219443	A	G	M760/Y506	0	0	5	0	0	5
																																							R	21263029	G	A	M764/PF5953	5	0	0	0	0	5
																																							R	17285993	C	T	P224/PF6050	0	0	0	4	0	4
																																							R	21409706	G	C	P227	0	1	0	0	0	1
																																							R	8050994	G	C	P229/PF6019	0	2	0	0	0	2
																																							R	23035132	G	A	P232	5	0	0	0	0	5
																																							R	21843090	C	G	P280	0	0	5	0	0	5
																																							R	19267344	C	A	P285	7	0	0	0	0	7
																																							R (Notes)	10008791	T	C	L150.2/PF6274.2/S351.2	0	3	0	0	0	3
																																							R1	14366723	C	T	CTS2565/M663	0	0	0	3	0	3
																																							R1	14556851	C	T	CTS2908/M666/PF6123	0	0	0	2	0	2
																																							R1	14674176	A	C	CTS3123/M670	0	5	0	0	0	5
																																							R1	14829196	C	T	CTS3321/M673	0	0	0	2	0	2
																																							R1	15874245	C	T	CTS4862/M691/PF6042/YSC0001281	0	0	0	2	0	2
																																							R1	7854412	A	G	F102/M625/PF6116	0	0	1	0	0	1
																																							R1	8416058	C	A	F132/M632	2	0	0	0	0	2
																																							R1	9788914	T	G	F211/Y290	0	0	2	0	0	2
																																							R1	7671535	C	T	F93/M621/PF6114	0	1	0	4	1	4
																																							R1	13807475	C	A	FGC189/Y305	12	1	0	0	1	12
																																							R1	22601068	T	C	L1352/M785/YSC0000230	0	4	0	2	2	4
																																							R1	16742224	A	G	L875/M706/PF6131/YSC0000288	0	0	3	0	0	3
																																							R1	15026424	A	C	M173/P241/Page29	0	4	0	0	0	4
																																							R1	22750583	C	A	M306/PF6147/S1	7	0	0	0	0	7
																																							R1	8676330	G	A	M640/PF6118	3	0	0	0	0	3
																																							R1	8738853	G	T	M643	0	0	0	7	0	7
																																							R1	15818409	A	G	M689	0	0	2	0	0	2
																																							R1	21917832	T	C	M781	0	5	0	0	0	5
																																							R1	15590342	G	T	P225	0	0	0	5	0	5
																																							R1	9989615	A	G	P231	0	0	1	0	0	1
																																							R1	21166358	T	G	P233	0	0	1	0	0	1
																																							R1	21117888	T	C	P234	0	2	0	0	0	2
																																							R1	7771131	G	A	P238/PF6115	2	0	0	0	0	2
																																							R1	7647357	G	A	P242/PF6113	3	0	1	0	1	3
																																							R1	8633545	T	C	P245/PF6117	0	4	0	0	0	4
																																							R1	17716251	C	T	P286/PF6136	0	0	0	1	0	1
																																							R1	7570822	G	C	P294/PF6112	0	5	1	0	1	5
																																							R1a~	18945240	C	T	CTS9515/M744	0	0	0	1	0	1
																																							R1a1	2657176	T	C	SRY10831.2	0	3	0	0	0	3
																																							R1a1a1a1c2b~	14406275	C	T	FGC19043/YP361	0	0	0	1	0	1
																																							R1a1a1a1d2b~	9788914	T	G	Y290	0	0	2	0	0	2
																																							R1a1a1b1a2a1a1a1~	14894861	C	T	YP575	0	0	0	1	0	1
																																							R1a1a1b1a2b3a1c1~	22707520	G	A	YP5201	1	0	0	0	0	1
																																							R1a1a1b1a2b4~	16333812	C	T	YP1153/Z27219	0	0	0	1	0	1
																																							R1a1a1b1a3a1a8~	6855209	G	A	YP5291	1	0	0	0	0	1
																																							R1a1a1b1a3a2	17293093	C	T	S223/Z287	0	0	0	2	0	2
																																							R1a1a1b1a3a3a~	4371392	C	T	YP595	0	0	0	1	0	1
																																							R1a1a1b2h1~	16984015	C	T	CTS6568.2/PF2270.2/Z1234.2	0	0	0	1	0	1
																																							R1b	14193384	G	A	CTS2134	3	0	0	0	0	3
																																							R1b	14226692	T	A	CTS2229/PF6254	1	0	0	0	0	1
																																							R1b	18914441	C	T	L278	0	0	0	3	0	3
																																							R1b	21995972	T	A	L506/PF6267	2	0	0	0	0	2
																																							R1b	21183643	A	G	L780/PF6105/YSC0000254	0	0	5	0	0	5
																																							R1b	2887824	C	A	M343/PF6242	3	0	0	0	0	3
																																							R1b	9170545	C	A	M415/PF6251	3	0	0	0	0	3
																																							R1b	7948701	G	T	PF6246	0	0	0	3	0	3
																																							R1b	8110520	T	A	PF6248	1	0	0	0	0	1
																																							R1b	8439542	G	A	PF6250	7	0	0	0	0	7
																																							R1b	14273103	T	G	PF6255	0	0	1	0	0	1
																																							R1b	23845409	T	C	PF6270	1	2	0	1	1	2
																																							R1b	23992762	C	A	PF6272	2	1	0	0	1	2
																																							R1b1	10038192	G	A	A702	3	0	0	0	0	3
																																							R1b1	14637352	T	C	CTS3063/V2515	0	1	0	0	0	1
																																							R1b1	15510064	T	G	CTS4244/PF6257/YSC0001279	0	0	6	0	0	6
																																							R1b1	18026855	G	A	CTS8436/PF6259	3	0	0	0	0	3
																																							R1b1	18109555	C	A	CTS8612/PF6260	4	0	0	0	0	4
																																							R1b1	19179606	A	C	CTS9972/PF6261	0	4	0	0	0	4
																																							R1b1	18407611	C	T	FGC35	0	0	0	2	0	2
																																							R1b1	13822833	G	T	FGC36/Y409	0	0	0	4	0	4
																																							R1b1	7900883	C	A	FGC41/M12190/Y108	2	0	0	0	0	2
																																							R1b1	21528257	T	C	L1068/PF6264/YSC0000223	0	4	0	1	1	4
																																							R1b1	21558298	G	T	L1345/PF6266/YSC0000224	0	0	1	2	1	2
																																							R1b1	22889018	G	A	L754/PF6269/YSC0000022	1	0	0	0	0	1
																																							R1b1	16773870	A	G	L761/PF6258/YSC0000266	1	0	6	0	1	6
																																							R1b1	19504659	T	A	L820/PF6262/YSC0000211	6	0	0	1	1	6
																																							R1b1	8214827	C	T	PF6249	0	0	0	3	0	3
																																							R1b1	23984056	G	A	PF6271	7	0	0	0	0	7
																																							R1b1a1b1a1	17589518	C	T	CTS7650/FGC44/PF6544	0	0	0	1	0	1
																																							R1b1a1b1a1a1c1a2a1~	17464197	T	C	L132.2	0	12	0	1	1	12
																																							R1b1a1b1a1a1c2b2b1a1a1b2	14272938	G	A	S381/Z81	1	0	0	0	0	1
																																							R1b1a1b1a1a2a1a1a3	15115334	G	A	CTS3702/S1220	1	0	0	0	0	1
																																							R1b1a1b1a1a2c1a1d1a	17748433	C	T	S777	0	0	0	1	0	1
																																							R1b1a1b1a1a2c1a2b1	22564462	G	A	Z16415	1	0	0	0	0	1
																																							R1b1a1b1a1a2c1a4e~	23502899	G	A	BY4058	1	0	0	0	0	1
																																							R1b1a1b1a1a2c1a5a2a1a	14912344	G	A	S3057	1	0	0	0	0	1
																																							R1b1b	18835861	C	T	FGC20963/V3544	0	2	0	6	2	6
																																							R1b1b	23467787	C	T	FGC20972/Y8457	0	0	0	9	0	9
																																							R1b1b	18033314	T	A	FGC20975/Y7782	6	0	0	1	1	6
																																							R1b1b	22858214	T	C	FGC20978/Y8455	0	2	0	0	0	2
																																							R1b1b	7823803	A	C	FGC20996/Y7772	0	2	0	0	0	2
																																							R1b1b	17517613	G	A	FGC20999/SK2064/Y7778	2	0	0	0	0	2
																																							R1b1b	22934825	C	A	FGC21020/Y8456	1	0	0	0	0	1
																																							R1b1b	14453475	T	G	FGC21051/Y8448	1	0	2	0	0	2
																																							R1b1b	4862861	C	T	PF6279^^/V88^^	0	0	0	3	0	3
																																							R1b1b	7404645	C	A	PF6289	2	1	0	0	1	2
																																							R1b1b	7797400	G	T	PF6290	0	0	0	2	0	2
																																							R1b1b	8219558	A	G	PF6291	0	0	3	0	0	3
																																							R1b1b	13843170	G	A	PF6299	7	0	0	0	0	7
																																							R1b1b	15540980	G	A	PF6307	7	0	0	0	0	7
																																							R1b1b	16535724	C	T	PF6309	0	0	0	9	0	9
																																							R1b1b	16853869	A	C	PF6310	0	3	0	0	0	3
																																							R1b1b	17212542	A	T	PF6311	0	0	0	4	0	4
																																							R1b1b	17298430	A	C	PF6312	0	5	0	0	0	5
																																							R1b1b	17514544	C	T	PF6313	0	0	0	2	0	2
																																							R1b1b	22115758	A	C	PF6332	0	1	0	0	0	1
																																							R1b1b	22203533	G	T	PF6333	0	0	0	4	0	4
																																							R1b1b	22859930	C	G	PF6338	0	0	1	0	0	1
																																							R1b1b	22932391	G	C	PF6339	0	2	0	0	0	2
																																							R1b1b	23969252	C	A	PF6343	1	0	0	0	0	1
																																							R1b1b	24442766	C	T	PF6344	0	0	0	3	0	3
																																							R1b1b	7391202	T	C	S5025/Z2174	0	1	0	0	0	1
																																							R1b1b2	16831003	C	G	FGC21014/SK2065/Y7777	1	0	1	0	0	1
																																							R1b1b2	18920547	C	A	FGC21015/V3608	3	0	0	0	0	3
																																							R1b1b2a	14187605	T	G	FGC20991/Y8446	0	0	1	0	0	1
																																							R1b1b2a	8229762	T	A	FGC20992/V1732	3	0	0	0	0	3
																																							R1b1b2a	14604107	T	G	FGC21010/Y8449	0	0	1	0	0	1
																																							R1b1b2a	21494515	C	T	FGC21011/Y7783	0	0	0	3	0	3
																																							R1b1b2a	17685245	G	A	FGC21027/Y8462	1	0	0	0	0	1
																																							R1b1b2a	8535601	G	A	FGC21034/SK2063/V2197	7	0	0	0	0	7
																																							R1b1b2a	22119518	C	T	FGC21063/Y7784	0	0	0	4	0	4
																																							S1a1a	17772153	G	A	Z41585	1	0	0	0	0	1
																																							S1a1b1d1a~	6847490	G	A	Z41348	2	0	0	0	0	2
																																							S1a2a	14472977	C	T	FT192969.2/MF136585.2	0	0	0	1	0	1
																																							S1d	17748433	C	T	S777.2	0	0	0	1	0	1
																																							S1d	17611794	G	A	Z42076	1	0	0	0	0	1
																																							S4~	15491777	G	A	Y93922	1	0	0	0	0	1
[truncated: 25 more columns]

## Sheet: 9
Supplementary Data 9. Kinship estimates from READv2.
Individual 1	Individual 2	Rel	Zup	Zdown	P0_mean	Nonnormalized_P0	Nonnormalized_P0_serr	1st_Type	Perc_Win_1stdeg_P0	OverlapNSNPs	NSNPsXNorm	KinshipCoefficient
GMO022	GMO007	First Degree	0.562854	NA	0.620294	0.151916	0.00204756	N/A	0.52439	141078	34551.3	0.379706
GMO019	GMO011	First Degree	0.26098	1.63275	0.78666	0.192661	0.0242487	N/A	0.953846	327	80.0854	0.21334
GMO019	GMO018	First Degree	7.8496	0.683569	0.64002	0.156747	0.00538141	N/A	0.666667	6099	1493.7	0.35998
GMO019	GMO008	IdenticalTwins/SameIndividual	0.348055	NA	0.568539	0.139241	0.0397291	N/A	1	79	19.3479	0.431461
GMO022	GMO004	Third Degree	1.2003	2.79132	0.949956	0.232653	0.00383474	N/A	0.699387	23477	5749.74	0.0500441
GMO004	GMO009_pmd	Third Degree	0.613494	4.45329	0.961182	0.235403	0.00302102	N/A	0.742331	39545	9684.95	0.0388176
GMO004	GMO001	Unrelated	NA	9.54016	1.01211	0.247875	0.00271755	N/A	0.852761	86124	21092.6	-0.0121092
GMO005	GMO001	Unrelated	NA	15.1699	1.0214	0.250152	0.00185911	N/A	0.920732	733279	179587	-0.0214047
GMO006	GMO001	Unrelated	NA	14.0402	1.01847	0.249432	0.00195742	N/A	0.920732	665681	163032	-0.0184651
GMO007	GMO001	Unrelated	NA	14.1595	1.02386	0.250752	0.00203417	N/A	0.939024	599429	146806	-0.0238556
GMO008	GMO001	Unrelated	NA	2.66814	0.979253	0.239828	0.00670096	N/A	0.810127	6292	1540.97	0.020747
GMO010	GMO001	Unrelated	NA	14.6211	1.03774	0.254153	0.00220259	N/A	0.957317	1107579	271257	-0.0377443
GMO011	GMO001	Unrelated	NA	10.6262	1.03858	0.254358	0.00304989	N/A	0.858025	31035	7600.77	-0.0385795
GMO012	GMO001	Unrelated	NA	17.6532	1.03342	0.253095	0.00176432	N/A	0.926829	1141843	279648	-0.0334234
GMO013	GMO001	Unrelated	NA	3.69316	1.00364	0.245801	0.00645824	N/A	0.75	6489	1589.22	-0.00363842
GMO015	GMO001	Unrelated	NA	12.9116	1.02857	0.251906	0.00232017	N/A	0.926829	408636	100079	-0.0285691
GMO018	GMO001	Unrelated	NA	14.7368	1.02096	0.250044	0.0019064	N/A	0.939024	746302	182776	-0.020963
GMO019	GMO001	Unrelated	NA	2.75107	0.976065	0.239047	0.00621512	N/A	0.685535	7601	1861.56	0.0239354
GMO022	GMO001	Unrelated	NA	12.9656	1.01431	0.248415	0.00204122	N/A	0.932927	198245	48552.1	-0.0143128
GMO007	GMO004	Unrelated	NA	6.86769	0.98451	0.241116	0.00279084	N/A	0.815951	59432	14555.5	0.0154898
GMO019	GMO004	Unrelated	NA	0.0250601	0.907843	0.222339	0.0155653	N/A	0.870968	949	232.419	0.0921573
GMO004	GMO005	Unrelated	NA	7.43701	1.00085	0.245118	0.00311537	N/A	0.814815	67906	16630.8	-0.000852353
GMO007	GMO005	Unrelated	NA	10.9806	1.01563	0.248737	0.00243957	N/A	0.932927	451187	110500	-0.0156291
GMO008	GMO005	Unrelated	NA	2.33805	0.977777	0.239467	0.00749246	N/A	0.691824	5103	1249.77	0.0222226
GMO011	GMO005	Unrelated	NA	7.39612	1.01922	0.249617	0.00374091	N/A	0.740741	24181	5922.16	-0.0192233
GMO013	GMO005	Unrelated	NA	2.59475	0.978261	0.239585	0.00679681	N/A	0.725	5305	1299.24	0.0217395
GMO015	GMO005	Unrelated	NA	11.0543	1.01177	0.247791	0.00233773	N/A	0.865854	309099	75701.3	-0.0117662
GMO019	GMO005	Unrelated	NA	1.9999	0.961412	0.235459	0.00675518	N/A	0.672956	6069	1486.36	0.0385882
GMO022	GMO005	Unrelated	NA	8.21565	0.999329	0.244745	0.00277468	N/A	0.853659	159374	39032.2	0.00067142
GMO004	GMO006	Unrelated	NA	6.80171	0.97932	0.239845	0.00263104	N/A	0.840491	64942	15904.9	0.02068
GMO005	GMO006	Unrelated	NA	5.61115	0.968921	0.237298	0.0027354	N/A	0.77439	495314	121307	0.031079
GMO007	GMO006	Unrelated	NA	10.6381	0.994965	0.243676	0.0020424	N/A	0.914634	425314	104163	0.00503478
GMO008	GMO006	Unrelated	NA	2.14821	0.974669	0.238706	0.00780015	N/A	0.72956	4759	1165.52	0.0253314
GMO011	GMO006	Unrelated	NA	6.26434	0.998586	0.244563	0.00360997	N/A	0.754601	22624	5540.83	0.00141361
GMO013	GMO006	Unrelated	NA	1.78172	0.953966	0.233635	0.00655896	N/A	0.6625	4965	1215.98	0.0460336
GMO015	GMO006	Unrelated	NA	9.89093	0.998431	0.244525	0.00228249	N/A	0.890244	290878	71238.8	0.00156918
GMO019	GMO006	Unrelated	NA	1.54591	0.947213	0.231982	0.00648961	N/A	0.675	5647	1383	0.0527865
GMO022	GMO006	Unrelated	NA	8.17838	0.987176	0.241769	0.00242341	N/A	0.890244	151922	37207.1	0.0128239
GMO004	GMO008	Unrelated	NA	0.628642	0.951156	0.232947	0.0174949	N/A	0.848684	777	190.295	0.0488436
GMO007	GMO008	Unrelated	NA	0.978005	0.93537	0.229081	0.00729208	N/A	0.72956	4374	1071.23	0.0646303
GMO013	GMO008	Unrelated	NA	0.439057	1.00508	0.246154	0.0551286	N/A	1	65	15.9191	-0.00508083
GMO022	GMO008	Unrelated	NA	0.886716	0.949889	0.232637	0.0120531	N/A	0.847134	1771	433.735	0.0501106
GMO001	GMO009_pmd	Unrelated	NA	13.9985	1.01619	0.248876	0.00192352	N/A	0.914634	423613	103747	-0.0161947
GMO005	GMO009_pmd	Unrelated	NA	9.37076	0.994944	0.243671	0.00231806	N/A	0.871951	288089	70555.7	0.00505605
GMO006	GMO009_pmd	Unrelated	NA	9.59856	0.989124	0.242246	0.00211455	N/A	0.884146	268244	65695.5	0.010876
GMO007	GMO009_pmd	Unrelated	NA	7.94561	0.992492	0.243071	0.00265827	N/A	0.890244	241477	59140	0.00750781
GMO008	GMO009_pmd	Unrelated	NA	1.75098	0.975891	0.239005	0.00974072	N/A	0.789809	2774	679.379	0.0241087
GMO010	GMO009_pmd	Unrelated	NA	13.7692	1.01867	0.249481	0.00199954	N/A	0.920732	413045	101159	-0.0186673
GMO011	GMO009_pmd	Unrelated	NA	4.24965	0.988569	0.24211	0.00474408	N/A	0.740741	13593	3329.05	0.0114311
GMO012	GMO009_pmd	Unrelated	NA	13.851	1.01673	0.249006	0.00195344	N/A	0.884146	422937	103581	-0.016728
GMO013	GMO009_pmd	Unrelated	NA	1.01327	0.943442	0.231058	0.00898953	N/A	0.759494	2930	717.585	0.0565576
GMO015	GMO009_pmd	Unrelated	NA	10.2433	0.997423	0.244278	0.00217987	N/A	0.896341	166339	40738	0.00257749
GMO018	GMO009_pmd	Unrelated	NA	11.8325	1.00685	0.246586	0.00208212	N/A	0.920732	294149	72039.9	-0.00684503
GMO019	GMO009_pmd	Unrelated	NA	3.17205	1.01631	0.248904	0.00849773	N/A	0.759494	3423	838.325	-0.016312
GMO022	GMO009_pmd	Unrelated	NA	6.5407	0.981518	0.240383	0.00281834	N/A	0.817073	83941	20557.9	0.0184818
GMO004	GMO010	Unrelated	NA	11.2288	1.01874	0.249499	0.00245353	N/A	0.846626	83916	20551.8	-0.0187416
GMO005	GMO010	Unrelated	NA	13.9372	1.03035	0.252342	0.00218072	N/A	0.945122	711165	174171	-0.0303491
GMO006	GMO010	Unrelated	NA	16.1952	1.03107	0.252519	0.00188756	N/A	0.926829	645461	158080	-0.0310696
GMO007	GMO010	Unrelated	NA	12.3573	1.03009	0.25228	0.00245445	N/A	0.914634	581363	142381	-0.030093
GMO008	GMO010	Unrelated	NA	3.59203	1.00477	0.246078	0.00671743	N/A	0.786164	6120	1498.85	-0.0047729
GMO011	GMO010	Unrelated	NA	9.98099	1.03328	0.253061	0.0031171	N/A	0.839506	30301	7421	-0.0332835
GMO013	GMO010	Unrelated	NA	4.22551	1.0224	0.250395	0.0067319	N/A	0.73125	6330	1550.28	-0.0223978
GMO015	GMO010	Unrelated	NA	12.6116	1.02905	0.252025	0.00238478	N/A	0.95122	396639	97140.7	-0.0290542
GMO018	GMO010	Unrelated	NA	13.2841	1.02977	0.252201	0.00227733	N/A	0.95122	723739	177251	-0.0297739
GMO019	GMO010	Unrelated	NA	3.43878	0.989135	0.242249	0.00590307	N/A	0.735849	7418	1816.74	0.0108649
GMO022	GMO010	Unrelated	NA	9.40464	1.02479	0.250981	0.003087	N/A	0.932927	192592	47167.6	-0.0247922
GMO004	GMO011	Unrelated	NA	2.22286	0.984459	0.241103	0.00861692	N/A	0.720497	3625	887.797	0.0155407
GMO007	GMO011	Unrelated	NA	6.52664	1.00588	0.246349	0.00373856	N/A	0.771605	20682	5065.22	-0.00587964
GMO008	GMO011	Unrelated	NA	1.44062	1.07006	0.262069	0.0278489	N/A	0.96	290	71.0238	-0.0700645
GMO013	GMO011	Unrelated	NA	1.28842	1.04305	0.255452	0.0260028	N/A	0.945736	321	78.616	-0.0430453
GMO022	GMO011	Unrelated	NA	3.33053	0.987694	0.241896	0.00598894	N/A	0.753086	8082	1979.36	0.0123063
GMO004	GMO012	Unrelated	NA	8.27774	1.00448	0.246008	0.00290638	N/A	0.834356	86099	21086.5	-0.00448329
GMO005	GMO012	Unrelated	NA	13.0393	1.02523	0.25109	0.00223483	N/A	0.95122	733411	179619	-0.0252349
GMO006	GMO012	Unrelated	NA	14.9356	1.02658	0.25142	0.00197316	N/A	0.926829	665887	163082	-0.0265814
GMO007	GMO012	Unrelated	NA	11.6091	1.02106	0.250066	0.00242197	N/A	0.926829	599953	146934	-0.0210557
GMO008	GMO012	Unrelated	NA	2.91656	0.987439	0.241833	0.0068176	N/A	0.748428	6306	1544.4	0.0125611
GMO010	GMO012	Unrelated	NA	18.292	1.04084	0.254913	0.00180207	N/A	0.95122	1104606	270529	-0.0408441
GMO011	GMO012	Unrelated	NA	9.88568	1.03179	0.252696	0.00311023	N/A	0.814815	31065	7608.11	-0.0317932
GMO013	GMO012	Unrelated	NA	3.22137	0.986214	0.241533	0.00607941	N/A	0.701863	6496	1590.93	0.0137857
GMO015	GMO012	Unrelated	NA	11.1403	1.0294	0.25211	0.00270732	N/A	0.939024	408961	100158	-0.0293991
GMO018	GMO012	Unrelated	NA	12.4051	1.02335	0.250628	0.00231184	N/A	0.945122	746166	182743	-0.0233489
GMO019	GMO012	Unrelated	NA	2.35506	0.963739	0.236029	0.00597849	N/A	0.716981	7605	1862.54	0.0362606
GMO022	GMO012	Unrelated	NA	8.52817	1.01447	0.248454	0.00310788	N/A	0.908537	198552	48627.3	-0.0144719
GMO004	GMO013	Unrelated	NA	1.29003	0.993465	0.243309	0.0165576	N/A	0.826923	822	201.316	0.00653507
GMO007	GMO013	Unrelated	NA	3.00488	1.00358	0.245787	0.00793295	N/A	0.75	4569	1118.99	-0.00358223
GMO019	GMO013	Unrelated	NA	0.369782	0.979954	0.24	0.0488146	N/A	1	75	18.3682	0.0200462
GMO022	GMO013	Unrelated	NA	2.45663	1.02462	0.250938	0.0118003	N/A	0.829114	1865	456.756	-0.0246166
GMO004	GMO015	Unrelated	NA	5.60124	0.980147	0.240047	0.00323109	N/A	0.766871	41396	10138.3	0.0198529
GMO007	GMO015	Unrelated	NA	10.4504	1.00298	0.24564	0.00226698	N/A	0.945122	267143	65425.9	-0.00298263
GMO008	GMO015	Unrelated	NA	2.07368	0.980062	0.240026	0.00871741	N/A	0.786164	3033	742.811	0.0199385
GMO011	GMO015	Unrelated	NA	5.55978	1.0068	0.246574	0.00442916	N/A	0.753086	14377	3521.06	-0.00679797
GMO013	GMO015	Unrelated	NA	2.47355	0.998999	0.244664	0.00918323	N/A	0.779874	3233	791.792	0.00100079
GMO019	GMO015	Unrelated	NA	2.56233	0.995637	0.243841	0.00854369	N/A	0.772152	3572	874.817	0.00436291
GMO022	GMO015	Unrelated	NA	7.36263	0.982302	0.240575	0.00252977	N/A	0.835366	97878	23971.3	0.0176984
GMO004	GMO018	Unrelated	NA	7.97361	0.997313	0.244251	0.00279699	N/A	0.797546	68712	16828.2	0.00268725
GMO005	GMO018	Unrelated	NA	13.1728	1.01522	0.248636	0.00202589	N/A	0.920732	543204	133036	-0.0152153
GMO006	GMO018	Unrelated	NA	11.4261	1.0117	0.247776	0.00226034	N/A	0.926829	498341	122048	-0.0117048
GMO007	GMO018	Unrelated	NA	9.70815	1.01731	0.24915	0.00280184	N/A	0.920732	453779	111135	-0.0173142
GMO008	GMO018	Unrelated	NA	2.72517	0.984673	0.241156	0.00704779	N/A	0.710692	5088	1246.1	0.0153275
GMO011	GMO018	Unrelated	NA	7.72114	1.02395	0.250774	0.00373327	N/A	0.783951	24536	6009.1	-0.0239471
GMO013	GMO018	Unrelated	NA	3.18607	1	0.24491	0.00720646	N/A	0.75625	5304	1299	0
GMO015	GMO018	Unrelated	NA	12.4954	1.01484	0.248545	0.00212847	N/A	0.926829	310519	76049.1	-0.014845
GMO022	GMO018	Unrelated	NA	8.7015	0.999257	0.244728	0.00261774	N/A	0.871951	159745	39123.1	0.000743
GMO007	GMO019	Unrelated	NA	3.04454	0.988977	0.24221	0.00665475	N/A	0.75	5231	1281.12	0.0110228
GMO022	GMO019	Unrelated	NA	0.000404422	0.906268	0.221954	0.0107361	N/A	0.802548	2068	506.473	0.0937323

## Sheet: 10
Supplementary Data 10. Kinship estimates from KIN
Individual 1	Individual 2	Relatedness	Second Guess	Log Likelihood Ratio	Within Degree Second Guess	Within Degree Log Likelihood Ratio	k0	k1	k2	IBD Length	IBD Number
GMO007	GMO022	Parent-Child	Second Degree	33.252	Siblings	38.2664	0	1	0	288	1
GMO018	GMO019	Parent-Child	Second Degree	26.304	Siblings	18.0633	0	1	0	285	1
GMO007	GMO009_pmd	Unrelated	Third Degree	20.504			1	0	0	0	1
GMO007	GMO012	Unrelated	Third Degree	20.295			1	0	0	0	1
GMO006	GMO018	Unrelated	Third Degree	20.277			1	0	0	0	1
GMO006	GMO007	Unrelated	Third Degree	20.276			1	0	0	0	1
GMO007	GMO010	Unrelated	Third Degree	20.01			1	0	0	0	1
GMO009_pmd	GMO022	Unrelated	Third Degree	19.858			1	0	0	0	1
GMO010	GMO015	Unrelated	Third Degree	19.775			1	0	0	0	1
GMO010	GMO018	Unrelated	Third Degree	19.638			1	0	0	0	1
GMO010	GMO022	Unrelated	Third Degree	19.542			1	0	0	0	1
GMO007	GMO015	Unrelated	Third Degree	19.519			1	0	0	0	1
GMO005	GMO012	Unrelated	Third Degree	19.499			1	0	0	0	1
GMO006	GMO022	Unrelated	Third Degree	19.472			1	0	0	0	1
GMO018	GMO022	Unrelated	Third Degree	19.406			1	0	0	0	1
GMO006	GMO015	Unrelated	Third Degree	19.301			1	0	0	0	1
GMO006	GMO010	Unrelated	Third Degree	19.264			1	0	0	0	1
GMO005	GMO007	Unrelated	Third Degree	19.189			1	0	0	0	1
GMO001	GMO018	Unrelated	Third Degree	19.18			1	0	0	0	1
GMO004	GMO012	Unrelated	Third Degree	19.01			1	0	0	0	1
GMO001	GMO012	Unrelated	Third Degree	18.881			1	0	0	0	1
GMO015	GMO022	Unrelated	Third Degree	18.848			1	0	0	0	1
GMO012	GMO022	Unrelated	Third Degree	18.817			1	0	0	0	1
GMO004	GMO010	Unrelated	Third Degree	18.814			1	0	0	0	1
GMO001	GMO004	Unrelated	Third Degree	18.525			1	0	0	0	1
GMO001	GMO022	Unrelated	Third Degree	18.522			1	0	0	0	1
GMO004	GMO018	Unrelated	Third Degree	18.478			1	0	0	0	1
GMO005	GMO022	Unrelated	Third Degree	18.472			1	0	0	0	1
GMO004	GMO007	Unrelated	Third Degree	18.456			1	0	0	0	1
GMO001	GMO015	Unrelated	Third Degree	18.394			1	0	0	0	1
GMO004	GMO005	Unrelated	Third Degree	18.393			1	0	0	0	1
GMO001	GMO010	Unrelated	Third Degree	18.3			1	0	0	0	1
GMO012	GMO015	Unrelated	Third Degree	18.218			1	0	0	0	1
GMO005	GMO018	Unrelated	Third Degree	18.143			1	0	0	0	1
GMO010	GMO011	Unrelated	Third Degree	17.793			1	0	0	0	1
GMO011	GMO012	Unrelated	Third Degree	17.721			1	0	0	0	1
GMO009_pmd	GMO011	Unrelated	Third Degree	17.698			1	0	0	0	1
GMO004	GMO006	Unrelated	Third Degree	17.609			1	0	0	0	1
GMO004	GMO009_pmd	Unrelated	Third Degree	17.514			1	0	0	0	1
GMO015	GMO018	Unrelated	Third Degree	17.34			1	0	0	0	1
GMO006	GMO011	Unrelated	Third Degree	17.246			1	0	0	0	1
GMO010	GMO012	Unrelated	Third Degree	17.224			1	0	0	0	1
GMO005	GMO011	Unrelated	Third Degree	16.956			1	0	0	0	1
GMO011	GMO018	Unrelated	Third Degree	16.92			1	0	0	0	1
GMO006	GMO012	Unrelated	Third Degree	16.841			1	0	0	0	1
GMO005	GMO015	Unrelated	Third Degree	16.808			1	0	0	0	1
GMO007	GMO011	Unrelated	Third Degree	16.732			1	0	0	0	1
GMO004	GMO015	Unrelated	Third Degree	16.511			1	0	0	0	1
GMO001	GMO011	Unrelated	Third Degree	16.255			1	0	0	0	1
GMO005	GMO010	Unrelated	Third Degree	16.128			1	0	0	0	1
GMO009_pmd	GMO018	Unrelated	Third Degree	15.676			1	0	0	0	1
GMO001	GMO007	Unrelated	Third Degree	15.663			1	0	0	0	1
GMO001	GMO009_pmd	Unrelated	Third Degree	15.303			1	0	0	0	1
GMO004	GMO022	Unrelated	Third Degree	13.464			1	0	0	0	1
GMO007	GMO018	Unrelated	Third Degree	13.357			0.992	0.008	0	1	1
GMO009_pmd	GMO010	Unrelated	Third Degree	13.272			0.989	0.011	0	1	1
GMO009_pmd	GMO012	Unrelated	Third Degree	13.226			0.983	0.017	0	5	4
GMO006	GMO009_pmd	Unrelated	Third Degree	13.169			0.985	0.015	0	4	2
GMO012	GMO018	Unrelated	Third Degree	12.802			0.992	0.008	0	2	2
GMO009_pmd	GMO015	Unrelated	Third Degree	12.679			0.985	0.015	0	3	3
GMO005	GMO009_pmd	Unrelated	Third Degree	12.078			0.966	0.034	0	10	6
GMO001	GMO006	Unrelated	Third Degree	12.039			0.979	0.021	0	6	4
GMO013	GMO018	Unrelated	Third Degree	12.018			1	0	0	0	1
GMO003	GMO007	Unrelated	Third Degree	11.341			1	0	0	0	1
GMO011	GMO015	Unrelated	Third Degree	11.332			1	0	0	0	1
GMO010	GMO013	Unrelated	Third Degree	10.866			1	0	0	0	1
GMO001	GMO005	Unrelated	Third Degree	10.452			0.971	0.029	0	6	3
GMO007	GMO013	Unrelated	Third Degree	10.016			1	0	0	0	1
GMO009_pmd	GMO019	Unrelated	Third Degree	9.581			1	0	0	0	1
GMO001	GMO019	Unrelated	Third Degree	9.58			1	0	0	0	1
GMO001	GMO013	Unrelated	Third Degree	9.536			1	0	0	0	1
GMO011	GMO022	Unrelated	Third Degree	9.349			1	0	0	0	1
GMO005	GMO017	Unrelated	Third Degree	9.342			1	0	0	0	1
GMO003	GMO012	Unrelated	Third Degree	8.923			1	0	0	0	1
GMO001	GMO008	Unrelated	Third Degree	8.758			1	0	0	0	1
GMO007	GMO017	Unrelated	Third Degree	8.682			1	0	0	0	1
GMO003	GMO010	Unrelated	Third Degree	8.654			1	0	0	0	1
GMO009_pmd	GMO013	Unrelated	Third Degree	8.299			1	0	0	0	1
GMO006	GMO013	Unrelated	Third Degree	8.107			1	0	0	0	1
GMO007	GMO019	Unrelated	Third Degree	7.836			1	0	0	0	1
GMO010	GMO019	Unrelated	Third Degree	7.823			1	0	0	0	1
GMO005	GMO013	Unrelated	Third Degree	7.591			1	0	0	0	1
GMO012	GMO019	Unrelated	Third Degree	7.565			1	0	0	0	1
GMO008	GMO018	Unrelated	Third Degree	7.558			1	0	0	0	1
GMO012	GMO013	Unrelated	Third Degree	7.55			1	0	0	0	1
GMO012	GMO017	Unrelated	Third Degree	6.954			1	0	0	0	1
GMO003	GMO009_pmd	Unrelated	Third Degree	6.846			1	0	0	0	1
GMO001	GMO003	Unrelated	Third Degree	6.83			1	0	0	0	1
GMO006	GMO019	Unrelated	Third Degree	6.802			1	0	0	0	1
GMO008	GMO012	Unrelated	Third Degree	6.708			1	0	0	0	1
GMO003	GMO006	Unrelated	Third Degree	6.36			1	0	0	0	1
GMO005	GMO008	Unrelated	Third Degree	6.314			1	0	0	0	1
GMO006	GMO008	Unrelated	Third Degree	6.184			1	0	0	0	1
GMO007	GMO008	Unrelated	Third Degree	6.156			1	0	0	0	1
GMO003	GMO018	Unrelated	Third Degree	5.897			1	0	0	0	1
GMO008	GMO009_pmd	Unrelated	Third Degree	5.825			1	0	0	0	1
GMO001	GMO017	Unrelated	Third Degree	5.817			1	0	0	0	1
GMO009_pmd	GMO017	Unrelated	Third Degree	5.617			1	0	0	0	1
GMO012	GMO020	Unrelated	Third Degree	5.408			1	0	0	0	1
GMO013	GMO015	Unrelated	Third Degree	5.264			1	0	0	0	1
GMO005	GMO019	Unrelated	Third Degree	5.224			1	0	0	0	1
GMO006	GMO017	Unrelated	Third Degree	4.982			1	0	0	0	1
GMO008	GMO010	Unrelated	Third Degree	4.579			0.938	0.062	0	0	1
GMO003	GMO005	Unrelated	Third Degree	4.513			1	0	0	0	1
GMO005	GMO006	Unrelated	Third Degree	4.487			0.902	0.098	0	27	9
GMO017	GMO022	Unrelated	Third Degree	4.364			1	0	0	0	1
GMO003	GMO022	Unrelated	Third Degree	4.356			1	0	0	0	1
GMO010	GMO017	Unrelated	Third Degree	4.223			1	0	0	0	1
GMO017	GMO018	Unrelated	Third Degree	4.194			1	0	0	0	1
GMO007	GMO016	Unrelated	Third Degree	3.312			1	0	0	0	1
GMO018	GMO020	Unrelated	Third Degree	3.28			1	0	0	0	1
GMO002	GMO009_pmd	Unrelated	Third Degree	3.25			1	0	0	0	1
GMO009_pmd	GMO020	Unrelated	Third Degree	3.103			1	0	0	0	1
GMO015	GMO019	Unrelated	Third Degree	3.018			0.937	0.063	0	0	1
GMO010	GMO020	Unrelated	Third Degree	2.905			1	0	0	0	1
GMO008	GMO015	Unrelated	Third Degree	2.838			0.939	0.061	0	0	1
GMO001	GMO020	Unrelated	Third Degree	2.811			1	0	0	0	1
GMO013	GMO022	Unrelated	Third Degree	2.713			1	0	0	0	1
GMO005	GMO016	Unrelated	Third Degree	2.71			1	0	0	0	1
GMO008	GMO022	Unrelated	Third Degree	2.676			1	0	0	0	1
GMO007	GMO020	Unrelated	Third Degree	2.625			1	0	0	0	1
GMO004	GMO011	Unrelated	Third Degree	2.583			0.936	0.064	0	0	1
GMO001	GMO016	Unrelated	Third Degree	2.506			1	0	0	0	1
GMO002	GMO012	Unrelated	Third Degree	2.341			1	0	0	0	1
GMO001	GMO002	Unrelated	Third Degree	2.193			1	0	0	0	1
GMO004	GMO017	Unrelated	Third Degree	2.173			1	0	0	0	1
GMO002	GMO010	Unrelated	Third Degree	2.16			1	0	0	0	1
GMO001	GMO014	Unrelated	Third Degree	2.076			1	0	0	0	1
GMO016	GMO022	Unrelated	Third Degree	2.015			1	0	0	0	1
GMO006	GMO020	Unrelated	Third Degree	1.859			1	0	0	0	1
GMO009_pmd	GMO016	Unrelated	Third Degree	1.847			1	0	0	0	1
GMO006	GMO016	Unrelated	Third Degree	1.782			1	0	0	0	1
GMO002	GMO018	Unrelated	Third Degree	1.704			1	0	0	0	1
GMO014	GMO018	Unrelated	Third Degree	1.698			1	0	0	0	1
GMO003	GMO004	Unrelated	Third Degree	1.655			1	0	0	0	1
GMO007	GMO014	Unrelated	Third Degree	1.524			1	0	0	0	1
GMO012	GMO016	Unrelated	Third Degree	1.521			1	0	0	0	1
GMO003	GMO015	Unrelated	Third Degree	1.502			0.938	0.062	0	0	1
GMO016	GMO018	Unrelated	Third Degree	1.482			1	0	0	0	1
GMO010	GMO014	Unrelated	Third Degree	1.466			1	0	0	0	1
GMO009_pmd	GMO014	Unrelated	Third Degree	1.406			1	0	0	0	1
GMO012	GMO014	Unrelated	Third Degree	1.381			1	0	0	0	1
GMO019	GMO022	Unrelated	Third Degree	1.268			0.931	0.069	0	0	1
GMO004	GMO008	Unrelated	Third Degree	1.238			1	0	0	0	1
GMO016	GMO017	Identical	Siblings	1.077			0	0	1	0	1
GMO005	GMO014	Unrelated	Third Degree	0.966			1	0	0	0	1
GMO003	GMO011	Unrelated	Third Degree	0.848			1	0	0	0	1
GMO004	GMO013	Unrelated	Third Degree	0.828			0.936	0.064	0	0	1
GMO015	GMO017	Unrelated	Third Degree	0.794			0.874	0.126	0	0	1
GMO002	GMO007	Unrelated	Third Degree	0.715			0.936	0.064	0	0	1
GMO002	GMO005	Unrelated	Third Degree	0.713			1	0	0	0	1
GMO008	GMO013	Unrelated	Third Degree	0.678			1	0	0	0	1
GMO014	GMO015	Unrelated	Third Degree	0.633			1	0	0	0	1
GMO010	GMO016	Unrelated	Third Degree	0.592			1	0	0	0	1
GMO003	GMO019	Siblings	Second Degree	0.55	Parent-Child	0.220644	0.246	0.499	0.255	88	1
GMO008	GMO017	Identical	Parent-Child	0.534			0	0	1	0	1
GMO006	GMO014	Unrelated	Third Degree	0.533			1	0	0	0	1
GMO013	GMO016	Identical	Siblings	0.515			0	0	1	0	1
GMO002	GMO006	Parent-Child	Second Degree	0.478	Siblings	2.4927	0	1	0	273	1
GMO014	GMO019	Identical	Parent-Child	0.468			0	0	1	0	1
GMO016	GMO019	Identical	Siblings	0.456			0	0	1	0	1
GMO005	GMO020	Third Degree	Unrelated	0.436			0.736	0.264	0	0	1
GMO003	GMO017	Parent-Child	Second Degree	0.418	Siblings	0.0305682	0	1	0	50	1
GMO003	GMO008	Unrelated	Third Degree	0.405			1	0	0	0	1
GMO016	GMO020	Identical	Parent-Child	0.389			0	0	1	0	1
GMO017	GMO019	Parent-Child	Second Degree	0.382	Siblings	0.0293176	0	1	0	86	1
GMO002	GMO019	Unrelated	Third Degree	0.377			1	0	0	0	1
GMO011	GMO017	Second Degree	Third Degree	0.355			0.498	0.502	0	153	1
GMO011	GMO019	Unrelated	Third Degree	0.35			0.936	0.064	0	0	1
GMO011	GMO013	Unrelated	Third Degree	0.345			0.937	0.063	0	0	1
GMO015	GMO016	Second Degree	Third Degree	0.344			0.484	0.516	0	142	1
GMO008	GMO019	Siblings	Second Degree	0.319	Parent-Child	0.221327	0.26	0.496	0.245	133	1
GMO002	GMO008	Unrelated	Third Degree	0.271			1	0	0	0	1
GMO008	GMO011	Unrelated	Third Degree	0.263			0.937	0.063	0	0	1
GMO004	GMO019	Unrelated	Third Degree	0.198			0.875	0.125	0	0	1
GMO002	GMO020	Unrelated	Third Degree	0.195			1	0	0	0	1
GMO002	GMO004	Second Degree	Third Degree	0.189			0.498	0.502	0	94	1
GMO004	GMO016	Second Degree	Third Degree	0.182			0.495	0.505	0	93	1
GMO002	GMO017	Unrelated	Third Degree	0.166			1	0	0	0	1
GMO011	GMO014	Unrelated	Third Degree	0.157			1	0	0	0	1
GMO002	GMO022	Third Degree	Unrelated	0.155			0.743	0.257	0	0	1
GMO002	GMO015	Unrelated	Third Degree	0.147			0.873	0.127	0	0	1
GMO008	GMO016	Unrelated	Third Degree	0.146			1	0	0	0	1
GMO020	GMO022	Third Degree	Unrelated	0.144			0.751	0.249	0	0	1
GMO014	GMO022	Unrelated	Third Degree	0.141			1	0	0	0	1
GMO004	GMO020	Third Degree	Unrelated	0.13			0.743	0.257	0	0	1
GMO017	GMO020	Siblings	Identical	0.127	Parent-Child	0.0514023	0.243	0.499	0.258	22	1
GMO013	GMO019	Siblings	Second Degree	0.104	Parent-Child	0.132552	0.259	0.499	0.242	143	1
GMO015	GMO020	Unrelated	Third Degree	0.072			0.868	0.132	0	0	1
GMO008	GMO020	Second Degree	Siblings	0.055			0.499	0.501	0	36	1
GMO013	GMO017	Second Degree	Parent-Child	0.053			0.503	0.497	0	63	1
GMO011	GMO016	Siblings	Second Degree	0.053	Parent-Child	0.0978964	0.263	0.496	0.24	39	1
GMO002	GMO013	Unrelated	Third Degree	0.052			1	0	0	0	1
GMO004	GMO014	Second Degree	Third Degree	0.041			0.503	0.497	0	0	1
GMO013	GMO020	Unrelated	Third Degree	0.035			1	0	0	0	1
GMO002	GMO003	Unrelated	Third Degree	0.033			1	0	0	0	1
GMO003	GMO013	Third Degree	Unrelated	0.026			0.744	0.256	0	0	1
GMO003	GMO020	Siblings	Identical	0.024	Parent-Child	0.0652693	0.241	0.497	0.262	23	1
GMO002	GMO011	Second Degree	Third Degree	0.015			0.497	0.503	0	18	1
GMO011	GMO020	Second Degree	Third Degree	0.009			0.503	0.497	0	0	1
GMO019	GMO020	Unrelated	Third Degree	0.007			0.875	0.125	0	0	1
GMO002	GMO014	Unrelated	Second Degree				0.003	0.003	0.003	0	1
GMO002	GMO016	Unrelated	Second Degree				0.003	0.003	0.003	0	1
GMO003	GMO014	Unrelated	Second Degree				0.003	0.003	0.003	0	1
GMO003	GMO016	Unrelated	Second Degree				0.003	0.003	0.003	0	1
GMO008	GMO014	Unrelated	Second Degree				0.003	0.003	0.003	0	1
GMO013	GMO014	Unrelated	Second Degree				0.003	0.003	0.003	0	1
GMO014	GMO016	Unrelated	Second Degree				0.003	0.003	0.003	0	1
GMO014	GMO017	Unrelated	Second Degree				0.003	0.003	0.003	0	1
GMO014	GMO020	Unrelated	Second Degree				0.003	0.003	0.003	0	1

[truncated: 13 more sheets: 11, 12, 13, 14, 15, 16, 17, 18, 19, 20, 21, 22, 23]
